# Supplementary material for: Public acceptance of COVID-19 vaccines: cross-national evidence on levels and individual-level predictors using observational data
Source: PubMed Central journal article supplement — BMJ Open. 2021 Jun 15;11(6):e048172. doi: 10.1136/bmjopen-2020-048172 (PMC8210695; doi:10.1136/bmjopen-2020-048172), 2021-06-15
Supplement: bmjopen-2020-048172.draft_revisions.pdf [file bmjopen-2020-048172.draft_revisions.pdf]

# BMJ Open

BMJ Open is committed to open peer review. As part of this commitment we make the peer review history of every article we publish publicly available.

When an article is published we post the peer reviewers' comments and the authors' responses online. We also post the versions of the paper that were used during peer review. These are the versions that the peer review comments apply to.

The versions of the paper that follow are the versions that were submitted during the peer review process. They are not the versions of record or the final published versions. They should not be cited or distributed as the published version of this manuscript.

BMJ Open is an open access journal and the full, final, typeset and author-corrected version of record of the manuscript is available on our site with no access controls, subscription charges or pay-per-view fees (<http://bmjopen.bmj.com>).

If you have any questions on BMJ Open's open peer review process please email [info.bmjopen@bmj.com](mailto:info.bmjopen@bmj.com)

# BMJ Open

## Willingness to Use an Approved COVID-19 Vaccine: Cross-National Evidence on Levels and Individual-Level Predictors

|                               |                                                                                                                                                                                                                                                                                      |
|-------------------------------|--------------------------------------------------------------------------------------------------------------------------------------------------------------------------------------------------------------------------------------------------------------------------------------|
| Journal:                      | <i>BMJ Open</i>                                                                                                                                                                                                                                                                      |
| Manuscript ID                 | bmjopen-2020-048172                                                                                                                                                                                                                                                                  |
| Article Type:                 | Original research                                                                                                                                                                                                                                                                    |
| Date Submitted by the Author: | 19-Dec-2020                                                                                                                                                                                                                                                                          |
| Complete List of Authors:     | Lindholt, Marie Fly; Aarhus Universitet, Political Science<br>Jørgensen, Frederik; Aarhus University, Department of Political Science<br>Bor, Alexander; Aarhus University, Department of Political Science<br>Petersen, Michael; Aarhus University, Department of Political Science |
| Keywords:                     | COVID-19, PUBLIC HEALTH, EPIDEMIOLOGY                                                                                                                                                                                                                                                |
|                               |                                                                                                                                                                                                                                                                                      |

SCHOLARONE™  
Manuscripts

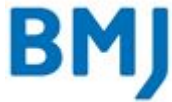

I, the Submitting Author has the right to grant and does grant on behalf of all authors of the Work (as defined in the below author licence), an exclusive licence and/or a non-exclusive licence for contributions from authors who are: i) UK Crown employees; ii) where BMJ has agreed a CC-BY licence shall apply, and/or iii) in accordance with the terms applicable for US Federal Government officers or employees acting as part of their official duties; on a worldwide, perpetual, irrevocable, royalty-free basis to BMJ Publishing Group Ltd ("BMJ") its licensees and where the relevant Journal is co-owned by BMJ to the co-owners of the Journal, to publish the Work in this journal and any other BMJ products and to exploit all rights, as set out in our [licence](#).

The Submitting Author accepts and understands that any supply made under these terms is made by BMJ to the Submitting Author unless you are acting as an employee on behalf of your employer or a postgraduate student of an affiliated institution which is paying any applicable article publishing charge ("APC") for Open Access articles. Where the Submitting Author wishes to make the Work available on an Open Access basis (and intends to pay the relevant APC), the terms of reuse of such Open Access shall be governed by a Creative Commons licence – details of these licences and which [Creative Commons](#) licence will apply to this Work are set out in our licence referred to above.

Other than as permitted in any relevant BMJ Author's Self Archiving Policies, I confirm this Work has not been accepted for publication elsewhere, is not being considered for publication elsewhere and does not duplicate material already published. I confirm all authors consent to publication of this Work and authorise the granting of this licence.

December 19, 2020

1  
2  
3  
4  
5  
6  
7  
8  
9  
10  
11  
12  
13  
14  
15  
16  
17  
18  
19  
20  
21  
22  
23  
24  
25  
26  
27  
28  
29  
30  
31  
32  
33  
34  
35  
36  
37  
38  
39  
40  
41  
42  
43  
44  
45  
46  
47  
48  
49  
50  
51  
52  
53  
54  
55  
56  
57  
58  
59  
60

## **Willingness to Use an Approved COVID-19 Vaccine: Cross-National Evidence on Levels and Individual-Level Predictors**

Marie Fly Lindholt<sup>1</sup>

Frederik Jørgensen<sup>1</sup>

Alexander Bor<sup>1</sup>

& Michael Bang Petersen<sup>1\*</sup>

<sup>1</sup>Department of Political Science, Aarhus University

\*Corresponding author: michael@ps.au.dk

## Abstract

### **Objectives**

*The management of the COVID-19 pandemic critically hinges on the approval of safe and effective vaccines but, equally importantly, on high willingness among lay people to use vaccines when approved. To facilitate vaccination willingness via effective health communication, it is key to understand both levels of skepticism towards an approved COVID-19 vaccine and the demographic, psychological and political sources of this skepticism. To this end, we examine the levels and predictors of willingness to use an approved COVID-19 vaccine.*

### **Design, setting and participants**

*We examine the levels and predictors of willingness to use an approved COVID-19 vaccine in large, representative surveys from eight Western democracies that differ both politically and in terms of the severity of the pandemic: Denmark, France, Germany, Hungary, Sweden, Italy, United Kingdom, and United States (total N = 9,889). We fielded quota-sampled surveys in these countries using online panels. Survey respondents were quota sampled to match the population margins on age, gender, and geographic location for each of the eight countries in our study.*

### **Main outcome measures**

*The main outcome of the study is vaccination willingness for an approved COVID-19 vaccine.*

### **Results**

*The data reveal large variation in vaccination willingness, both across and within countries ranging from 79 % in Denmark to 38 % in Hungary. Thus, most national levels fall below current best estimates for the required threshold for reaching herd immunity. Across national and demographic groups, the analyses demonstrate that a lack of vaccination willingness is associated with low levels of trust in authorities, conspiracy-related beliefs and a lack of*

1  
2  
3 *concern about COVID-19. These factors also account for cross-national levels in vaccination*  
4 *willingness.*  
5  
6  
7  
8

### 9 **Conclusion**

10  
11 *Our results reveals concerning levels of vaccination willingness and suggest that best*  
12 *communication target is the consequences of infections for the self and close others.*  
13  
14  
15

### 16 **Strengths and limitations of this study**

- 17  
18  
19  
20
  - 21 • Large samples that are reflective of the populations of interest.
  - 22 • Cross-national data that allows to examine the generalizability of findings and the
  - 23 factors underlying cross-national differences.
  - 24 • An broad-based assessment of potential correlates of vaccination willingness,
  - 25 including both demographics, political and COVID-specific factors.
  - 26 • Observational data which limits causal traction.

27  
28  
29  
30  
31  
32  
33  
34

35 Acknowledgements: We are grateful for research assistance from Magnus Storm Rasmussen.  
36  
37

38 Funding statement: This work was supported by The Carlsberg Foundation grant number  
39 CF20-0044 to Michael Bang Petersen. The funders had no role in the conduct of this research.  
40  
41  
42

43 Competing interests: None.  
44  
45

46 Contributors: MFL, FJ, AB and MBP designed the study and collected data. MFL and FJ  
47 analyzed data. MFL, FJ, AB and MBP wrote the paper.  
48  
49  
50

51 Data sharing statement: Upon publication data will be publicly available at a repository at  
52 Open Science Framework.  
53  
54

55  
56 Word count: 4,271.  
57  
58  
59  
60

## Background

A vaccine against COVID-19 is a “vital tool” in the management of the current pandemic and will help societies world-wide to return to normal.[1] Accordingly, researchers, authorities and industry have invested extraordinary amounts of resources into vaccine development with unprecedented speed and, currently, about 40 vaccine candidates are in the process of or have already recruited human participants for medical trials.[2]

Yet, even when an approved vaccine is widely available, societies across the world will face another challenge: Vaccine skepticism. Researchers currently estimate that up to 82 percent of the population of any given country may need to be vaccinated in order to reach herd immunity. [3-4] However, experts acknowledge that there is an increasing trend toward vaccine hesitancy.[5] This has been the case for many non-COVID-19 vaccine programs, and is also likely to pose a challenge for COVID-19 vaccines.[6-7] Consistent with this, initial cross-national survey evidence suggests that substantially fewer people worldwide are willing to get vaccinated than would be necessary; and that some countries – e.g. Russia, Poland and France – face strikingly high levels of skepticism.[8] Thus, a key challenge for the management of pandemic is for health authorities (and, potentially, other actors) across the world to encourage people to accept an approved COVID-19 vaccine through careful approval procedures and effective health communication. This latter challenge emphasizes the importance of understanding why people are hesitant about taking a future vaccine. Such knowledge will be crucial for optimizing communication about an approved vaccine in a way that will increase vaccination willingness.

In this manuscript, we present a descriptive analysis of the willingness to receive a future approved COVID-19 vaccine across eight Western democracies. Furthermore, we investigate individual-level predictors of vaccination willingness. The results demonstrate that for most of the countries in our sample, people are only moderately willing to receive a vaccine. Furthermore, vaccine skepticism is pronounced with more than 10 percent in six out of eight countries saying that they will refuse a future COVID-19 vaccine. The analyses of the individual-level predictors demonstrate that this vaccine skepticism is fueled by three factors: (1) *lack of trust* in the national health authorities, (2) *conspiracy-related concerns* about the authorities’ handling of the pandemic, and (3) a *lack of concern about the personal consequences* of the corona pandemic. The role of these factors are remarkably constant across countries and demographic groups and additional analyses suggest that they also inform

1  
2  
3 national-level variation in vaccination willingness. While these results highlight features to  
4 emphasize in health communication, they also point to the challenges faced by health agencies  
5 across the world: Trust is difficult to establish via short term communication and the existing  
6 evidence suggest that the toll of the pandemic so far has eroded rather than increased the  
7 public's trust in authorities.[9]  
8  
9

## 14 **Potential predictors: Who are expected to be willing to get a future approved** 15 **COVID-19 vaccine?** 16

17  
18 To understand the individual-level sources of vaccination willingness – and, hence, the  
19 potential target of health communication to increase such willingness – we utilize a broad-  
20 based approach and assess a multitude of potential sources. On the basis of prior research on  
21 attitudes about vaccines in general and COVID-19 vaccines in particular, it is relevant to  
22 consider at least five categories of predictors: (1) Background demographics, (2) trust in  
23 relevant authorities and groups, (3) disease-specific risk-perceptions, (4) disease-specific  
24 attitudes including conspiracy-related attitudes and (5) propensities to engage in other forms of  
25 disease-specific protective behavior.  
26  
27  
28  
29  
30  
31

32  
33 Regarding background demographics, prior studies of vaccine acceptance of a future COVID-  
34 19 vaccine have found that males are more likely to accept a potential COVID-19 vaccine [10-  
35 12], potentially due to sex-based differences in COVID-19 mortality.[10] Another relevant  
36 predictor is age and it seems reasonable that older people would be more willing to receive a  
37 vaccine due to a higher risk of a severe infection. This is confirmed by Lazarus et al. (2020)[8]  
38 and Hacquin et al. (2020)[12], but neither Dror et al. (2020) nor Wong et al. (2020)[10-11]  
39 found any age differences in vaccine acceptance. Prior studies on vaccine hesitancy have also  
40 focused on education. Lower education among parents is significantly associated with vaccine  
41 refusal for child vaccine programs,[13] and lower education is also associated with general  
42 vaccine hesitancy,[14] and COVID-19 vaccine hesitancy.[12] Thus, we include sex, age and  
43 education as demographic predictors in our model. As a final background predictor, we also  
44 include individual differences in political ideology. In context of the COVID-19 pandemic,  
45 prior research found that compliance with health advice may be influenced by political  
46 ideology, especially in regions where the pandemic has been the target of political  
47 polarization.[15]  
48  
49  
50  
51  
52  
53  
54  
55  
56  
57  
58  
59  
60



1  
2  
3 Trust is a crucial predictor of vaccine acceptance. Guay et al. (2019), for example, found that  
4 distrust in public health authorities is associated with general vaccine hesitancy.[14] This  
5 relationship has been well-documented in case of specific vaccine programs too. For example,  
6 people who trust the health authorities, doctors and the government were more likely to accept  
7 the HPV vaccine.[16] Initial work on COVID-19 vaccines also demonstrates that those who  
8 have higher trust in scientists are more willing to get vaccinated.[17] Finally, beyond trust in  
9 different authorities, interpersonal trust may also be important. Thus, interpersonal trust may  
10 be a key predictor of the willingness to contribute to collective action during the COVID-19  
11 pandemic.[18] Vaccinations is a form of collective action, where herd immunity is produced  
12 via the collective participation in vaccination programs,[19] and people may be more likely to  
13 participate if they trust others to do the same. To test these trust-related predictors of  
14 vaccination willingness, we therefore measure trust in the national health authorities, trust in  
15 scientists, trust in the government, and interpersonal trust in our surveys.

26 Turning to COVID-19 specific factors, we examine three factors: risk-perceptions, attitudes  
27 and compliance. Following a standard distinction within research on public attitudes,[20] we  
28 investigate the role of two categories of corona-related risk-perceptions: egotropic and  
29 sociotropic concern. While egotropic risk-perceptions relate to the consequences for the self or  
30 close and your family, sociotropic concern includes the consequences at the societal level, such  
31 as the country's economy and the capacity of the health care sector. Several studies have found  
32 that self-perceived risk of COVID-19 positively predicts acceptance of a potential COVID-19  
33 vaccine.[10, 12, 21] Likewise, Wong et al. (2020) argued that perceived susceptibility to  
34 infection predicted the intention to take a future COVID-19 vaccine.[11] Thus, we expect that  
35 egotropic concern predict vaccination willingness. Furthermore, it is plausible that sociotropic  
36 concern predict vaccination willingness, since having a vaccine also can be seen as a form of  
37 other-directed behavior that protects individuals beyond the self. For example, empathy  
38 towards the vulnerable predicts vaccination willingness during the COVID-19 pandemic.[22]  
39 Accordingly, it is plausible that individuals who worry about the broader consequences of the  
40 coronavirus have higher vaccination willingness. Receiving the vaccine is a way to stop the  
41 transmission of COVID-19 and thereby reducing the cause of concern. On this basis, we  
42 include COVID-19-specific measures for both egotropic and a range of sociotropic concerns  
43 about the impact of the disease.

57 The next set of predictors we consider are attitudinal in nature. Prior literature on both vaccine  
58 hesitancy in general and in the context of the COVID-10 pandemic found that hesitancy is  
59  
60

1  
2  
3 integrated into a broader set of political attitudes and perceptions. Most prominently, people  
4 prone to conspiracy thinking are also more likely to be hesitant about vaccines.[23-24] This is  
5 also the case in the current context, where higher levels of coronavirus conspiracy thinking are  
6 associated with lower willingness to accept a future vaccine against COVID-19.[25, 21,  
7 although see 26]  
8  
9

10  
11  
12 The COVID-19 pandemic may spur anti-systemic sentiments on three different levels,  
13 reflecting the level of severity associated with it: (1) a general concern about the state's  
14 infringement on democratic rights, (2) support of public protests against the government's  
15 policies during the COVID-19 pandemic, and (3) belief in specific conspiracy theories related  
16 to COVID-19. We examine all these levels of anti-systemic sentiments and how they relate to  
17 vaccination willingness.  
18  
19

20  
21  
22 Furthermore, we examine the role of awareness of misinformation. From the literature we know  
23 that susceptibility to misinformation negatively affects people's willingness to accept a vaccine  
24 against COVID-19.[17] However, studies have also shown that pre-bunking can help cultivate  
25 "mental antibodies" against misinformation.[27-29] Thus, it is likely that awareness of  
26 misinformation is positively associated with vaccination willingness.  
27  
28

29  
30  
31 Next, we examine the feeling of "pandemic fatigue" as a potential correlate of vaccination  
32 willingness. The WHO has been warning about widespread fatigue among populations in the  
33 Fall of 2020.[30] It is plausible that people who feel fatigued are willing to do what it takes to  
34 end the pandemic including being vaccinated. However, perhaps paradoxically, fatigue could  
35 also generate an unwillingness to comply with further requirements from authorities including  
36 vaccinations. Thus, we include attitudes about concern for democratic rights, support for  
37 protests, conspiracy belief, awareness of misinformation, and fatigue in our model.  
38  
39

40  
41  
42 Finally, we examine the association between compliance during the COVID-19 pandemic and  
43 vaccine acceptance. The willingness to get vaccinated can be seen as yet another form of  
44 compliance with the health advice of authorities during the pandemic. Specifically, we  
45 investigate the potential correlates of behavior change, knowledge and support for restrictions.  
46 Individual-level behavior change to avoid the spread of infections and support for government  
47 restrictions are two direct measures of willingness to comply with other official initiatives  
48 during the pandemic. Accordingly, it is likely that larger behavior change and higher support  
49 is related to increased vaccination willingness. Finally, we include a psychological precursor  
50 to compliance. Knowledge about proper behavior was one of the best predictors of compliance  
51  
52  
53  
54  
55  
56  
57  
58  
59  
60

1  
2  
3 with physical distancing policies during the first wave of the pandemic.[31] Furthermore,  
4 perceived insufficient knowledge is significantly associated with general vaccine  
5 hesitancy.[14] Thus, it is plausible that knowledge about proper behavior during the pandemic  
6 is also associated with compliant behavior in the sense of taking a future COVID-19 vaccine.  
7  
8 To sum up, we therefore examine behavior change, support for restrictions, and knowledge in  
9  
10  
11  
12 our model.  
13  
14  
15

## 16 **Methods**

17  
18  
19 **Patient and public involvement.** Patients and/or the public were not involved in the design,  
20 or conduct, or reporting, or dissemination plans of this research.  
21  
22

23 **Data.** We fielded quota-sampled surveys in eight countries from September 13 until November  
24 7: Denmark, Sweden, the United Kingdom, the United States of America, Italy, France,  
25 Germany and Hungary (please see Table A1 in the appendix for an overview of the data  
26 collection). This period consists of four data rounds in Denmark, and three data rounds in the  
27 remaining countries with approximately 500 respondents per data round. In each of the eight  
28 countries in our sample, the survey company Epinion sampled adult respondents using online  
29 panels. Among the panelists invited to take our survey, the response rate (calculated as the  
30 fraction of complete responses over invited, eligible participants) across the countries in our  
31 sample was between 18 % (Hungary) and 64 % (the United States). The survey was conducted  
32 in line with the Danish ethical guidelines for conducting survey-based research involving  
33 human subjects. Survey respondents were quota sampled to match the population margins on  
34 age, gender, and geographic location for each of the eight countries in our study. We address  
35 imbalances by post-stratifying our sample data to match the demographic margins from the  
36 population. All statistical analyses presented in the manuscript employ these post-stratification  
37 weights.  
38  
39  
40  
41  
42  
43  
44  
45  
46  
47  
48  
49  
50

## 51 **Measures**

52 All measures are self-reported from participant questionnaires. The key measures are  
53 vaccination willingness, trust in relevant authorities and groups, disease-specific risk-  
54 perceptions, disease-specific attitudes including conspiracy-related attitudes and propensities  
55  
56  
57  
58  
59  
60

to engage in other forms of disease-specific protective behavior. Table 1 provides an overview of question wordings and scales for these measures.

**Table 1:** Main measures in the study

|                                | Questions                                                                                                                                                                                                                                                                                                           | Values                                                                                                                      |
|--------------------------------|---------------------------------------------------------------------------------------------------------------------------------------------------------------------------------------------------------------------------------------------------------------------------------------------------------------------|-----------------------------------------------------------------------------------------------------------------------------|
| <b>Vaccination willingness</b> | If the health authorities advise people like me to get an approved vaccine against the coronavirus, I will follow their advice.                                                                                                                                                                                     | 1. Completely disagree<br>2. Somewhat disagree<br>3. Neither agree nor disagree<br>4. Somewhat agree<br>5. Completely agree |
| <b>Trust</b>                   | How much trust do you have in the following institutions regarding the coronavirus crisis?<br>1) The national health authorities<br>2) scientists                                                                                                                                                                   | 1. Not at all<br>2. To a lesser degree<br>3. To a certain degree<br>4. To a high degree                                     |
|                                | Give your assessment on a scale from 0 to 10, where 0 indicates that you have no confidence in the government at all, and 10 indicates that you have full confidence in the government.                                                                                                                             | 0. No confidence at all<br>1.<br>2.<br>3.<br>4.<br>5.<br>6.<br>7.<br>8.<br>9.<br>10. Full confidence                        |
|                                | Do you think that most people by and large are to be trusted, or that you cannot be too careful when it comes to other people?                                                                                                                                                                                      | 0. You cannot be too careful<br>1.<br>2.<br>3.<br>4.<br>5.<br>6.<br>7.<br>8.<br>9.<br>10. Most people are to be trusted     |
| <b>Concern</b>                 | To what degree are you concerned about the consequences of the corona-virus...<br><br>(1) ... for you and your family?<br>(2) ... for hospitals' ability to help the sick?<br>(3) ... for society's ability to help the disadvantaged?<br>(4) ... on social unrest and crime?<br>(5) ... on the country's economy?" | 1. Not at all<br>2. To a lesser degree<br>3. To a certain degree<br>4. To a high degree                                     |
| <b>Attitudes</b>               | To what extent do you agree with the following statements?                                                                                                                                                                                                                                                          | 1. Completely disagree<br>2. Somewhat disagree<br>3. Neither agree nor disagree                                             |

|                   |                                                                                                                                                                                                                                                                                                                                                                                                                                                                                                                                                                                                                                                                                                                                                                          |                                                                                         |
|-------------------|--------------------------------------------------------------------------------------------------------------------------------------------------------------------------------------------------------------------------------------------------------------------------------------------------------------------------------------------------------------------------------------------------------------------------------------------------------------------------------------------------------------------------------------------------------------------------------------------------------------------------------------------------------------------------------------------------------------------------------------------------------------------------|-----------------------------------------------------------------------------------------|
|                   | (1) I'm concerned about my democratic rights in the current circumstances<br>(2) I support the public protests against the government's policies during the COVID-19 pandemic<br>(3) I believe the government is hiding important information from the public about the coronavirus and its cures<br>(4) I have heard or read information about the coronavirus and its cures, which I believe was probably false<br>(5) I do not think I can keep up with the restrictions against the coronavirus for much longer.                                                                                                                                                                                                                                                     | 4. Somewhat agree<br>5. Completely agree                                                |
| <b>Compliance</b> | To what degree do you feel that the current situation with the coronavirus has made you change your behavior to avoid spreading infection?                                                                                                                                                                                                                                                                                                                                                                                                                                                                                                                                                                                                                               | 1. Not at all<br>2. To a lesser degree<br>3. To a certain degree<br>4. To a high degree |
|                   | To what degree do you feel that you know enough about what you as a citizen should do in relation to the coronavirus?                                                                                                                                                                                                                                                                                                                                                                                                                                                                                                                                                                                                                                                    | 1. Not at all<br>2. To a lesser degree<br>3. To a certain degree<br>4. To a high degree |
|                   | As you may know, many countries have implemented various measures to stop the spread of the COVID-19 epidemic. We are interested in whether you support or oppose the following measures in your country:<br><br>(1) Closing of schools and universities<br>(2) Closing (or work from home) for all-but-essential workplaces (e.g. grocery shops, doctors)<br>(3) Cancelling public events<br>(4) Cancelling private gatherings with over 100 people<br>(5) Closing public transportation<br>(6) Ordering people to shelter-in-place (not leaving house with minimal exceptions)<br>(7) Restricting internal movement between cities/regions<br>(8) Ordering people to wear face masks in public places<br>(9) Banning arrivals for foreign travelers from some regions. | 1. Oppose<br>2. Support                                                                 |

Note: Mean and standard deviation of all measures is available in table A2.

Our outcome, vaccination willingness, is rescaled to range from 0-1, with higher values indicating higher levels of willingness to get a future COVID-19 vaccine. Furthermore, all measures of trust, concern and disease-specific attitudes are rescaled from 0-1, with higher values indicating higher levels of trust, concern and agreement with the disease-specific statements. For our compliance measures, we rescale behavior change and knowledge to range from 0-1, with higher values indicating higher levels of behavior change and knowledge. Furthermore, we create an index of support for restrictions by adding the nine measures of support for restrictions. The index is scaled to range from 0-1, with higher values indicating

1  
2  
3 higher levels of support for restrictions. “Do not know” answers are classified as missing and  
4 are not included in the analysis.  
5  
6

7 Finally, we include sex, age, education and political ideology as background variables. Sex is  
8 an indicator variable (0 for males; 1 for females). Age is a continuous variable asking  
9 respondents how old they are. Age is rescaled from 0-1, with 0 being the minimum age in the  
10 sample (18 years) and 1 being the maximum age (100 years). Education is an indicator variable  
11 based on the internationally comparable ISCED-scale (0 for non-tertiary education; 1 for  
12 tertiary education). Finally, political ideology is measured using the question: “*In political*  
13 *matters, people talk of ‘the left’ and ‘the right’.* How would you place your views on this scale,  
14 *generally speaking?*”. Respondents answered on a scale from “1 – The left” to “11 – The right”.  
15 This measure is rescaled to range from 0 to 1, with 0 indicating the ideological standpoint to  
16 the utmost left and 1 indicating the ideological standpoint to the utmost right.  
17  
18  
19  
20  
21  
22  
23  
24  
25  
26  
27

### 28 *Statistical analyses.*

29  
30 All predictors are scaled from 0-1 in the analysis below. Table A2 in the appendix reports the  
31 descriptive statistics for all the above correlates in our overall sample. Moreover, Figure A1 in  
32 the appendix shows an overview of all bivariate correlations.  
33  
34

35  
36 In the analysis we present six models: (I) a model with all the bivariate correlations of  
37 vaccination willingness, (II) a trust model, (III) a concern model, (IV) an attitudes model, (V)  
38 a compliance model, and (VI) a full model that includes all predictors described above. Models  
39 II-VI include country dummies to control for country specific effects. Thus, our aim is to  
40 identify individual-level predictors of willingness to get a future COVID-19 vaccine. In the  
41 analysis, we use clustered robust standard errors at the country level. Furthermore, we present  
42 robustness tests in the Online Appendix where we replicate the analysis treating the 4-point  
43 scale measures of trust, concern, behavior change and knowledge as categorical variables  
44 instead of continuous (see Figure A2-A5). The results are essentially similar to those presented  
45 in the main text.  
46  
47  
48  
49  
50  
51  
52  
53  
54  
55  
56  
57  
58  
59  
60

## Results

First, we assess the overall distribution of vaccination willingness across the eight countries in our sample. Second, we present the results for the individual-level predictors of vaccination willingness.

Figure 1 shows the distribution of vaccination willingness, by country. The histograms display the country-specific distributions of vaccination willingness. The horizontal boxes show the 25th-75th percentile of the distributions. The white crosses and bars display mean and median values, respectively, while the whiskers show the minimum and maximum values.

[Figure 1 about here]

Across the eight countries, we observe large differences in the level of vaccination willingness. In Denmark and in the United Kingdom, the distribution is highly skewed towards willingness to get a future COVID-19 vaccine. Specifically, we observe the highest level of vaccination willingness in Denmark (79 %). Furthermore, we observe a high level of vaccination willingness in the United Kingdom (65 %). However, we observe only moderate levels of vaccination willingness in Italy (54 %), Germany (54 %), Sweden (50 %) and the United States (48 %). The lowest levels of vaccination willingness is observed in France (41 %) and Hungary (38 %). Furthermore, it is worth noticing that in six of the eight countries in our sample, more than 10 percent indicate complete disagreement with the idea to get the vaccine. In Hungary, one in three respondents chose this option.

Therefore, the results indicate that in most of the countries in our sample, vaccine skepticism is present and that a significant proportion of the population plans to refuse a future approved COVID-19 vaccine. These results underscore two important points: First, that vaccine skepticism is present in each of the countries in our sample demonstrates the importance of understanding the individual-level variation of vaccination willingness in order to understand the potential targets of health communication. Second, the large variation across countries emphasizes the need of a more thorough understanding of the importance of national context. We therefore also explore the macro-level correlations of vaccination willingness in the Discussion section.

1  
2  
3 On this basis, we turn towards understanding the individual-level predictors of willingness to  
4 get a future COVID-19 vaccine. Figure 2 and Table 2 present the results of the analysis.  
5 Specifically, Figure 2 reports the estimated correlations between vaccination willingness and  
6 individual-level predictors of vaccination willingness controlled for country dummies. The size  
7 of the estimated coefficients reported below reflects the difference in vaccination willingness  
8 when we compare individuals at the minimum and maximum values, respectively, for each of  
9 the correlates.  
10  
11  
12  
13  
14  
15  
16  
17

18 [Figure 2 about here]  
19  
20  
21  
22  
23  
24  
25  
26  
27  
28  
29  
30  
31  
32  
33  
34  
35  
36  
37  
38  
39  
40  
41  
42  
43  
44  
45  
46  
47  
48  
49  
50  
51  
52  
53  
54  
55  
56  
57  
58  
59  
60

For peer review only



**Table 2:** Individual-level predictors of vaccination willingness

|                          | Model I              | Model II             | Model III            | Model IV             | Model V              | Model VI             |
|--------------------------|----------------------|----------------------|----------------------|----------------------|----------------------|----------------------|
|                          | Bivariate            | Trust                | Concern              | Attitudes            | Compliance           | Full model           |
| <b>Demographics</b>      |                      |                      |                      |                      |                      |                      |
| Sex (female)             | -0.058***<br>(0.008) | -0.053***<br>(0.009) | -0.062***<br>(0.010) | -0.052***<br>(0.009) | -0.070***<br>(0.009) | -0.059***<br>(0.007) |
| Age                      | 0.210***<br>(0.020)  | 0.162**<br>(0.038)   | 0.216**<br>(0.048)   | 0.139**<br>(0.038)   | 0.180**<br>(0.042)   | 0.145**<br>(0.034)   |
| Education (tertiary)     | 0.039***<br>(0.008)  | 0.027**<br>(0.008)   | 0.042**<br>(0.008)   | 0.026**<br>(0.007)   | 0.035**<br>(0.008)   | 0.021*<br>(0.007)    |
| Political ideology       | -0.062***<br>(0.017) | -0.035<br>(0.024)    | -0.039<br>(0.045)    | -0.016<br>(0.030)    | -0.022<br>(0.044)    | -0.001<br>(0.020)    |
| <b>Trust</b>             |                      |                      |                      |                      |                      |                      |
| Health authorities       | 0.475***<br>(0.013)  | 0.221***<br>(0.020)  |                      |                      |                      | 0.176***<br>(0.013)  |
| Scientists               | 0.464***<br>(0.014)  | 0.237***<br>(0.029)  |                      |                      |                      | 0.165***<br>(0.022)  |
| The government           | 0.333***<br>(0.014)  | 0.120**<br>(0.032)   |                      |                      |                      | 0.066**<br>(0.017)   |
| Interpersonal trust      | 0.191***<br>(0.016)  | 0.002<br>(0.020)     |                      |                      |                      | 0.058*<br>(0.017)    |
| <b>Concern</b>           |                      |                      |                      |                      |                      |                      |
| You and your family      | 0.223***<br>(0.015)  |                      | 0.252***<br>(0.037)  |                      |                      | 0.120***<br>(0.022)  |
| Hospitals                | 0.102***<br>(0.015)  |                      | 0.063*<br>(0.024)    |                      |                      | 0.036*<br>(0.015)    |
| Society                  | 0.078***<br>(0.015)  |                      | 0.020<br>(0.021)     |                      |                      | 0.004<br>(0.013)     |
| Social unrest and crime  | -0.034*<br>(0.014)   |                      | -0.100***<br>(0.016) |                      |                      | -0.044*<br>(0.013)   |
| The country's economy    | 0.043**<br>(0.016)   |                      | -0.008<br>(0.038)    |                      |                      | 0.017<br>(0.024)     |
| <b>Attitudes</b>         |                      |                      |                      |                      |                      |                      |
| Democratic rights        | -0.244***<br>(0.013) |                      |                      | -0.092**<br>(0.022)  |                      | -0.035<br>(0.021)    |
| Conspiracy beliefs       | -0.264***<br>(0.012) |                      |                      | -0.133***<br>(0.023) |                      | -0.066**<br>(0.017)  |
| Support protests         | -0.200***<br>(0.012) |                      |                      | -0.044<br>(0.029)    |                      | -0.012<br>(0.021)    |
| Misinformation           | 0.051***<br>(0.015)  |                      |                      | 0.100**<br>(0.019)   |                      | 0.069**<br>(0.015)   |
| Fatigue                  | -0.202***<br>(0.013) |                      |                      | -0.073*<br>(0.023)   |                      | -0.035*<br>(0.012)   |
| <b>Compliance</b>        |                      |                      |                      |                      |                      |                      |
| Behavior change          | 0.273***<br>(0.015)  |                      |                      |                      | 0.171***<br>(0.015)  | 0.087**<br>(0.022)   |
| Knowledge                | 0.167***<br>(0.019)  |                      |                      |                      | 0.085*<br>(0.029)    | -0.027<br>(0.022)    |
| Support for restrictions | 0.299***<br>(0.015)  |                      |                      |                      | 0.240***<br>(0.029)  | 0.105***<br>(0.009)  |
| Constant                 |                      | 0.102**<br>(0.020)   | 0.259***<br>(0.046)  | 0.532***<br>(0.034)  | 0.126**<br>(0.029)   | 0.017<br>(0.033)     |
| Observations             | 9,889                | 9,889                | 9,889                | 9,889                | 9,889                | 9,889                |
| R <sup>2</sup>           | NA                   | 0.246                | 0.157                | 0.168                | 0.178                | 0.246                |

Notes. Entries are unstandardized OLS regression coefficients from models with all variables standardized on a scale from 0-1. Clustered robust standard errors on country level in parentheses. Model 1 displays effects from bivariate models and, hence, a combined R<sup>2</sup> cannot be computed. Models II-VI include control for country dummies. \*  $p < 0.05$ , \*\*  $p < 0.01$ , \*\*\*  $p < 0.001$ .

1  
2  
3 Examining the demographic predictors, we observe that being male, older, and having tertiary  
4 education is associated with higher vaccination willingness in case of an approved COVID-19  
5 vaccine. Specifically, females are 5.9 percentage points less willing to receive a vaccine  
6 compared to males. Furthermore, age is a positive predictor of vaccination willingness. When  
7 we compare respondents at the minimum and maximum level of age in the sample, the  
8 difference is 14.5 percentage points. Finally, respondents with tertiary education are 2.1  
9 percentage points more willing to receive an approved COVID-19 vaccine compared to  
10 respondents with non-tertiary education.  
11

12  
13 Focusing on trust, we observe that trust in the national health authorities is the strongest  
14 predictor of vaccination willingness. Specifically, the respondents who have the highest level  
15 of trust in the national health authorities are 17.6 percentage points more willing to receive an  
16 approved COVID-19 vaccine compared to those with the least trust in the national health  
17 authorities. The same pattern is observed for trust in scientists. Specifically, the respondents  
18 with the highest level of trust in scientists are 16.5 percentage points more willing to receive  
19 an approved COVID-19 vaccine compared to those with the lowest level of trust in scientists.  
20 Furthermore, trust in the government and interpersonal trust are also significant positive  
21 predictors of vaccination willingness. Respondents with the highest level of trust in the  
22 government are 6.6 percentage points more willing to receive an approved COVID-19 vaccine  
23 compared to those with the lowest level of trust in the government. Finally, respondents with  
24 the highest level of interpersonal trust are 5.8 percentage points more willing to receive an  
25 approved COVID-19 vaccine compared to respondents with the lowest level of interpersonal  
26 trust.  
27

28  
29 Looking into corona-specific concern, we find that egotropic concerns dominate sociotropic  
30 concerns in vaccination willingness. The respondents who are the most concerned about the  
31 consequences of the corona crisis for themselves and their families are 12 percentage points  
32 more willing to receive an approved COVID-19 vaccine compared to the least concerned  
33 respondents. For sociotropic concern, concern for the capacity of hospitals and concern for  
34 social unrest and crime are the only significant predictors. Specifically, the respondents who  
35 are the most concerned about the consequences of the corona crisis for the hospitals' ability to  
36 help the sick are 3.6 percentage points more willing to receive an approved COVID-19 vaccine  
37 compared to the least concerned respondents. Furthermore, the respondents who are the most  
38 concerned about the consequences of the corona crisis for social unrest and crime are 4.4  
39  
40  
41  
42  
43  
44  
45  
46  
47  
48  
49  
50  
51  
52  
53  
54  
55  
56  
57  
58  
59  
60

1  
2  
3 percentage points less willing to receive an approved COVID-19 vaccine compared to the least  
4 concerned respondents.  
5

6  
7 Focusing on corona-specific attitudes, we observe that awareness of misinformation is  
8 positively associated with vaccination willingness, while conspiracy belief and fatigue are  
9 negatively associated with vaccination willingness. Specifically, respondents who think that  
10 they have been exposed to misinformation are 6.9 percentage points more willing to receive an  
11 approved COVID-19 vaccine. Furthermore, respondents who have the highest level of  
12 conspiracy belief, and thus thinking that the government is hiding important information about  
13 the coronavirus and its cures, are 6.6 percentage points less willing to receive an approved  
14 COVID-19 vaccine. Finally, respondents with the highest level of fatigue are 3.5 percentage  
15 points less willing to receive an approved vaccine.  
16  
17

18  
19 Finally, looking at compliance, we see that both behavior change and support for restrictions  
20 positively predicts vaccination willingness. Specifically, respondents who have changed their  
21 behavior the most to avoid spreading infection are 8.7 percentage points more willing to receive  
22 an approved COVID-19 vaccine compared to respondents who have changed their behavior  
23 the least. Finally, respondents who are most supportive of restrictions are 10.5 percentage  
24 points more willing to receive a vaccine compared to respondents who are the least supportive  
25 of restrictions.  
26  
27

28  
29 While the overall patterns are relatively uniform across countries, we observe some notable  
30 differences (see Figure A6 in the Online Appendix). In the United Kingdom, trust in the  
31 national health authorities is not a significant predictor of vaccination willingness.  
32 Furthermore, egotropic concern is not a significant predictor of vaccination willingness in  
33 Denmark and Italy. Moreover, there is no uniform patterns in the relationship between political  
34 ideology and vaccination willingness across countries. Finally, subgroup analyses assessing  
35 potential heterogeneity across demographic groups show that the results are essentially  
36 homogenous across sex, age and educational level (see Figures A8-A10 in the Online  
37 Appendix).  
38  
39  
40  
41  
42  
43  
44  
45  
46  
47  
48  
49  
50  
51  
52  
53  
54  
55  
56  
57  
58  
59  
60

## Discussion

In this paper, we have investigated (1) the level of willingness to receive an approved COVID-19 vaccine, and (2) the individual-level predictors of vaccination willingness. The data show large variation in vaccination willingness both across countries and within many of the countries in our sample, with a significant proportion saying that they would refuse a future approved COVID-19 vaccine. This highlights the need for understanding the individual-level variation underlying vaccine skepticism and identifying potential targets for health communication to increase willingness.

When each predictive factor is assessed individually, these present results demonstrate that the key individual drivers of willingness to receive an approved COVID-19 vaccine are (1) trust in the national health authorities, and (2) personal health concerns. First, we found that respondents who trust the national health authorities were most willing to receive a COVID-19 vaccine compared to respondents who lack trust in the national health authorities. Second, we found that the people who are the most concerned for the consequences of the corona crisis for themselves and their families had high vaccination willingness. While these factors are the most prominent when everything is assessed individually, the present data also shows that vaccine skepticism is interwoven into a larger web of attitudes and behaviors related to anti-systemic sentiments. Hence, in addition to trust in health authorities, a lack of willingness was also related to concerns about democratic rights, endorsement of conspiracy beliefs and a lack of compliance with advice about changing behavior to avoid spreading infections.

As a final explorative analysis, we assess whether these factors also help explain the cross-national variation in vaccination willingness. To this end, we examine the correlations between vaccination willingness at the national level and each of the different independent measures aggregated for each country. All of these correlations are available in Figure A11 in the Online Appendix. In Figure 3, we present the correlations for key variables highlighted above: Trust in health authorities, egotropic concern, conspiracy beliefs and behavior change. While the analysis is highly limited by the fact that it only includes eight national cases, it is nonetheless strikingly informative. While differences in egotropic concern are not strongly related to cross-national differences, country averages in the anti-systemic measures, especially (lack of) trust in health authorities, are exceptionally closely related to country averages in vaccination willingness. Trust in health authorities does not just explain differences in vaccination willingness between individuals but also between countries.

[Figure 3 about here]

In sum, these analyses point to the significant challenges involved in convincing vaccine skeptics. The web of anti-systemic attitudes and distrust that vaccine skepticism is interwoven in makes it difficult to craft efficient health communication, as the effectiveness of communication is fundamentally contingent on the preceding existence of trust in its source. This challenge might be further deepened during the COVID-19 pandemic as research suggests that the stress of the pandemic and the restrictions itself fuels anti-systemic beliefs.[9] In this regard, it is also notable that feelings of “pandemic fatigue”, which according to the WHO is on the rise,[30] is *negatively* related to vaccination willingness, suggesting paradoxically that vaccination willingness may in fact become less pronounced as the pandemic continues. It is important to note that these results are observational rather than causal in nature. Nonetheless, they suggest that the best communication target is the consequences of infections for the self and close others. In addition, these results underscore the key importance of health and political authorities to strive to uphold trust to the maximum extent during the pandemic. This is not just crucial for managing the pandemic until a vaccine arrives but also for ending the pandemic when the vaccine arrives.

## Figure captions and legends

### Figure 1: Vaccination willingness for an approved COVID-19 vaccine

Note: Histograms: display the distributions of vaccination willingness, by country. Boxplots: boxes hold the 25th-75th percentile, white bars are median values, white crosses are mean values, while whiskers are minimum and maximum values.

### Figure 2: Individual-level correlations of vaccination willingness

Note: N = 9,889. Black circles are the estimated correlations based on model I-VI in Table 1. Models II-VI include control for country dummies. Horizontal bars are the associated 95 % confidence interval.

### Figure 3: Macro-level correlations of vaccination willingness

Note: The figure plots country averages for vaccination willingness and country averages for four measures: Trust in health authorities, egotropic concern related to COVID-19, endorsement of COVID-19 conspiracy beliefs and the degree of changed behavior to avoid spreading infections during the COVID-19 pandemic. Reported correlations are pearson's r.

## References

- [1] WHO. 2020. WHO Director-General's opening remarks at the media briefing on COVID-19 - 21 August 2020. <https://www.who.int/dg/speeches/detail/who-director-general-s-opening-remarks-at-the-media-briefing-on-covid-19---21-august-2020>
- [2] Danish Medicine Agency (2020). *Overview of planned and ongoing clinical studies of vaccines for COVID-19*. Report available at <https://laegemiddelstyrelsen.dk/da/nyheder/temaer/ny-coronavirus-covid-19/vacciner-og-medicin-til-behandling-mod-covid-19/~media/3A4B7F16D0924DD8BD157BBE17BFED49.ashx>, accessed Nov 23, 2020.
- [3] Britton, T., Ball, F., & Trapman, P. (2020). A mathematical model reveals the influence of population heterogeneity on herd immunity to SARS-CoV-2. *Science*, 369, 846–849
- [4] Sanche, S., Lin, Y. T., Xu, C., Romero-Severson, E., Hengartner, N., & Ke, R. (2020). High contagiousness and rapid spread of severe acute respiratory syndrome coronavirus 2. *Emerging Infectious Diseases*, 26
- [5] Dubé, E., Laberge, C., Guay, M., Bramadat, P., Roy, R., & Bettinger, J. A. (2013). Vaccine hesitancy: an overview. *Human vaccines & immunotherapeutics*, 9(8), 1763-1773.
- [6] The DELVE Initiative (2020), *SARS-CoV-2 Vaccine Development & Implementation: Scenarios, Options, Key Decisions*. DELVE Report No. 6. Published 01 October 2020. Available from <http://rs-delve.github.io/reports/2020/10/01/covid19-vaccination-report.html>.
- [7] Schuster, M., & Duclos, P. (2015). WHO recommendations regarding vaccine hesitancy. *Vaccine*, 33(34), 4155-218.
- [8] Lazarus, J. V., Ratzan, S. C., Palayew, A., Gostin, L. O., Larson, H. J., Rabin, K., ... & El-Mohandes, A. (2020). A global survey of potential acceptance of a COVID-19 vaccine. *Nature medicine*, 1-4.
- [9] Bartusevičius, H., Bor, A., Jørgensen, F. J., & Petersen, M. B. (2020). The psychological burden of the COVID-19 pandemic drives anti-systemic attitudes and political violence.
- [10] Dror, A. A., Eisenbach, N., Taiber, S., Morozov, N. G., Mizrahi, M., Zigran, A., & Sela, E. (2020). Vaccine hesitancy: the next challenge in the fight against COVID-19. *European journal of epidemiology*, 35(8), 775-779.
- [11] Wong, L. P., Alias, H., Wong, P. F., Lee, H. Y., & AbuBakar, S. (2020). The use of the health belief model to assess predictors of intent to receive the COVID-19 vaccine and willingness to pay. *Human vaccines & immunotherapeutics*, 1-11.
- [12] Hacquin, A. S., Altay, S., de Araujo, E., Chevallier, C., & Mercier, H. (2020). Sharp rise in vaccine hesitancy in a large and representative sample of the French population: reasons for vaccine hesitancy.

- 1  
2  
3 [13] Bertoncello, C., Ferro, A., Fonzo, M., Zanovello, S., Napoletano, G., Russo, F., ... &  
4 Cocchio, S. (2020). Socioeconomic Determinants in Vaccine Hesitancy and Vaccine Refusal  
5 in Italy. *Vaccines*, 8(2), 276.  
6  
7  
8 [14] Guay, M., Gosselin, V., Petit, G., Baron, G., & Gagneur, A. (2019). Determinants of  
9 vaccine hesitancy in Quebec: a large population-based survey. *Human Vaccines &*  
10 *Immunotherapeutics*, 15(11), 2527-2533.  
11  
12 [15] Gollwitzer, A., Martel, C., Brady, W. J., Pärnamets, P., Freedman, I. G., Knowles, E. D.,  
13 & Van Bavel, J. J. (2020). Partisan differences in physical distancing are linked to health  
14 outcomes during the COVID-19 pandemic. *Nature Human Behaviour*, 1-12.  
15  
16  
17 [16] Nan, X., Zhao, X., & Briones, R. (2014). Parental cancer beliefs and trust in health  
18 information from medical authorities as predictors of HPV vaccine acceptability. *Journal of*  
19 *Health Communication*, 19(1), 100-114.  
20  
21  
22 [17] Roozenbeek, J., Schneider, C. R., Dryhurst, S., Kerr, J., Freeman, A. L., Recchia, G., &  
23 van der Linden, S. (2020a). Susceptibility to misinformation about COVID-19 around the  
24 world. *Royal Society Open Science*, 7(10), 201199.  
25  
26  
27 [18] Johnson, T., Dawes, C., Fowler, J., & Smirnov, O. (2020). Slowing COVID-19  
28 transmission as a social dilemma: Lessons for government officials from interdisciplinary  
29 research on cooperation. *Journal of Behavioral Public Administration*, 3(1).  
30  
31  
32 [19] Siegal, G., Siegal, N., & Bonnie, R. J. (2009). An account of collective actions in public  
33 health. *American Journal of Public Health*, 99(9), 1583-1587.  
34  
35  
36 [20] Lewis-Beck, M. S., & Paldam, M. (2000). Economic voting: an introduction. *Electoral*  
37 *studies*, 19(2-3), 113-121.  
38  
39 [21] Salali, G. D., & Uysal, M. S. (2020). COVID-19 vaccine hesitancy is associated with  
40 beliefs on the origin of the novel coronavirus in the UK and Turkey. *Psychological medicine*,  
41 1-3.  
42  
43 [22] Pfattheicher, S., Petersen, M. B., & Böhm, R. (2020, September 30). Information about  
44 herd immunity and empathy promote COVID-19 vaccination intentions.  
45 <https://doi.org/10.31234/osf.io/wzu6k>  
46  
47  
48 [23] Jolley, D., & Douglas, K. M. (2014). The effects of anti-vaccine conspiracy theories on  
49 vaccination intentions. *PloS one*, 9(2), e89177.  
50  
51 [24] Tomljenovic, H., Bubic, A., & Erceg, N. (2020). It just doesn't feel right—the relevance of  
52 emotions and intuition for parental vaccine conspiracy beliefs and vaccination  
53 uptake. *Psychology & Health*, 35(5), 538-554.  
54  
55  
56 [25] Freeman, D., Waite, F., Rosebrock, L., Petit, A., Causier, C., East, A., ... & Bold, E.  
57 (2020). Coronavirus conspiracy beliefs, mistrust, and compliance with government guidelines  
58 in England. *Psychological Medicine*, 1-30.  
59  
60



1  
2  
3 [26] McManus, S., D'Ardenne, J., & Wessely, S. (2020). Covid conspiracies: misleading  
4 evidence can be more damaging than no evidence at all. *Psychological Medicine*, 21, 1-2.  
5

6 [27] Roozenbeek, J., van der Linden, S., & Nygren, T. (2020b). Prebunking interventions based  
7 on “inoculation” theory can reduce susceptibility to misinformation across cultures. *Harvard*  
8 *Kennedy School Misinformation Review*, 1(2).  
9

10 [28] Roozenbeek, J., & Van Der Linden, S. (2019). The fake news game: actively inoculating  
11 against the risk of misinformation. *Journal of Risk Research*, 22(5), 570-580.  
12

13 [29] Van Der Linden, S., Maibach, E., Cook, J., Leiserowitz, A., & Lewandowsky, S. (2017).  
14 Inoculating against misinformation. *Science*, 358(6367), 1141-1142.  
15

16 [30] Michie, S., West, R., & Harvey, N. (2020). The concept of “fatigue” in tackling covid-  
17 19. *bmj*, 371.  
18

19 [31] Jørgensen, F. J., Bor, A., & Petersen, M. B. (2020). Compliance Without Fear: Predictors  
20 of Protective Behavior During the First Wave of the COVID-19 Pandemic. *PsyArXiv*. May, 19.  
21

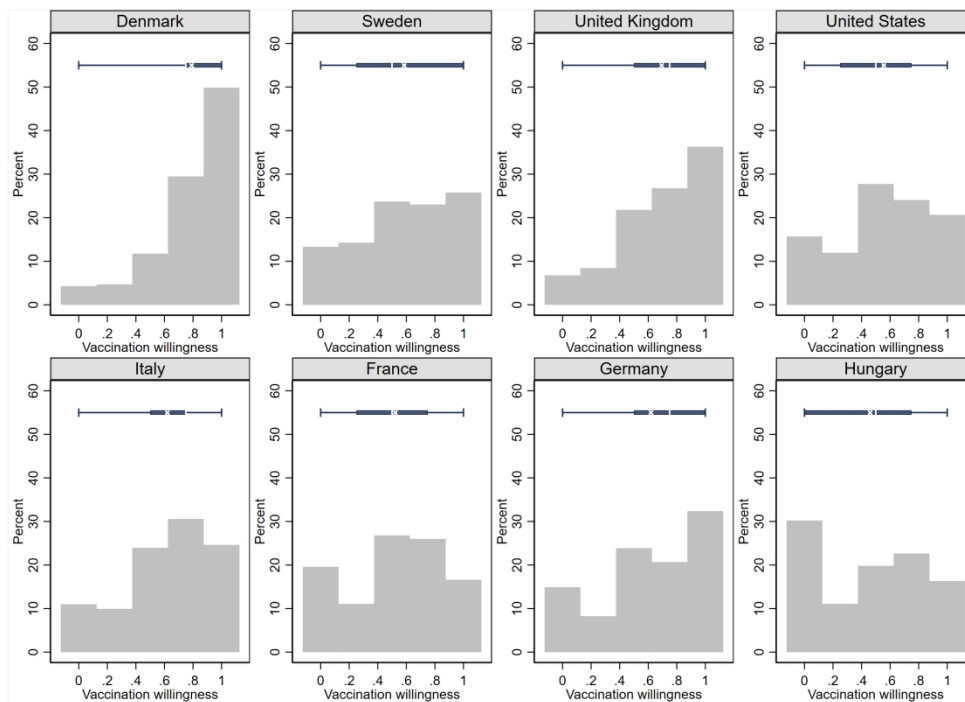

Figure 1: Vaccination willingness for an approved COVID-19 vaccine

Note: Histograms: display the distributions of vaccination willingness, by country. Boxplots: boxes hold the 25th-75th percentile, white bars are median values, white crosses are mean values, while whiskers are minimum and maximum values.

846x615mm (72 x 72 DPI)

1  
2  
3  
4  
5  
6  
7  
8  
9  
10  
11  
12  
13  
14  
15  
16  
17  
18  
19  
20  
21  
22  
23  
24  
25  
26  
27  
28  
29  
30  
31  
32  
33  
34  
35  
36  
37  
38  
39  
40  
41  
42  
43  
44  
45  
46  
47  
48  
49  
50  
51  
52  
53  
54  
55  
56  
57  
58  
59  
60

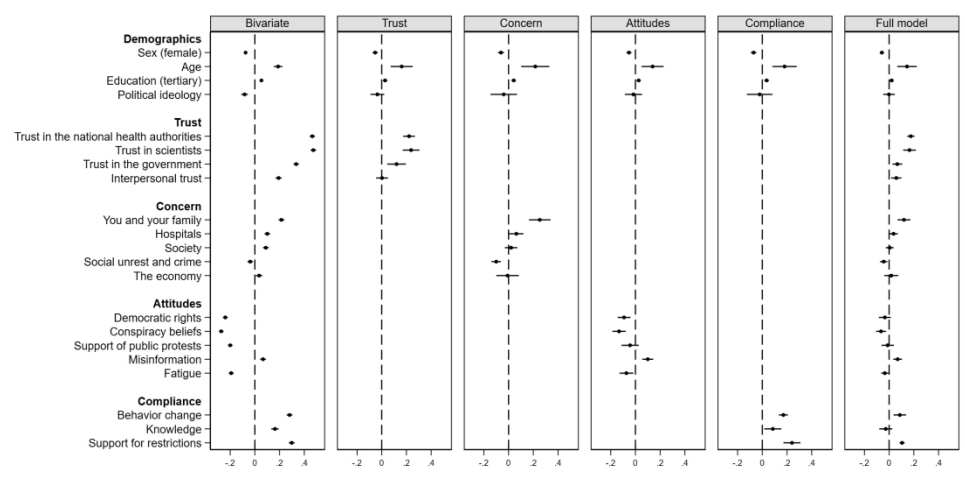

Figure 2: Individual-level correlations of vaccination willingness

Note: N = 9,889. Black circles are the estimated correlations based on model I-VI in Table 1. Models II-VI include control for country dummies. Horizontal bars are the associated 95 % confidence interval.

846x423mm (72 x 72 DPI)

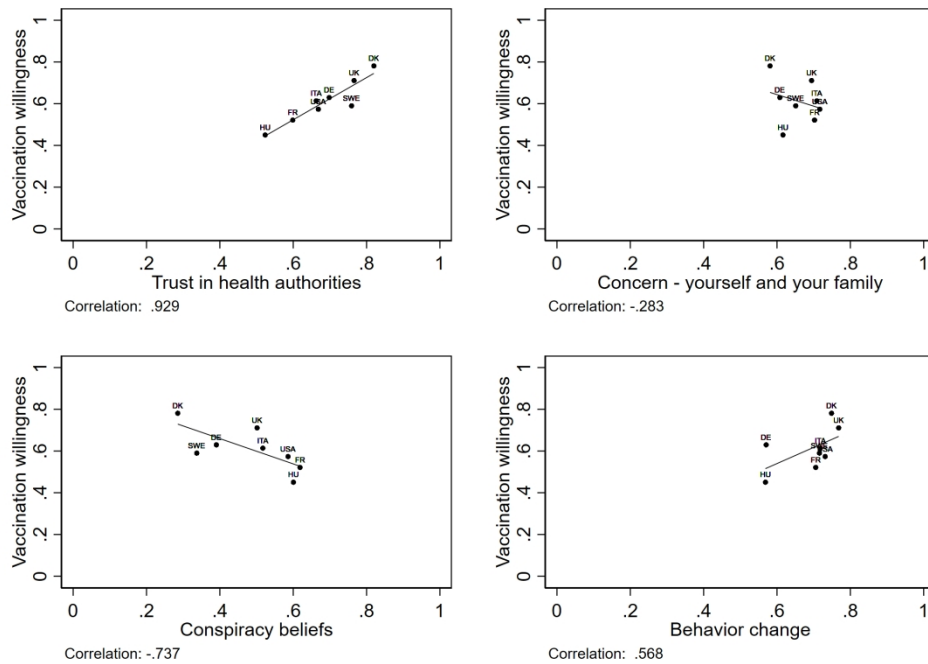

Figure 3: Macro-level correlations of vaccination willingness

Note: The figure plots country averages for vaccination willingness and country averages for four measures: Trust in health authorities, egotropic concern related to COVID-19, endorsement of COVID-19 conspiracy beliefs and the degree of changed behavior to avoid spreading infections during the COVID-19 pandemic. Reported correlations are pearson's r.

846x615mm (72 x 72 DPI)

**Online appendix****Table A1:** Overview of data collection

| <b>Country</b> | <b>Dates</b>              | <b>Obs.</b> |
|----------------|---------------------------|-------------|
| Denmark        | September 13 – November 7 | 1,364       |
| Sweden         | September 13 – November 7 | 1,052       |
| United Kingdom | September 13 – November 7 | 1,185       |
| United States  | September 13 – November 7 | 1,269       |
| Italy          | September 13 – November 7 | 1,329       |
| France         | September 13 – November 7 | 1,247       |
| Germany        | September 13 – November 7 | 1,215       |
| Hungary        | September 13 – November 7 | 1,228       |

**Table A2:** Descriptive statistics

|                                      | Mean | SD   | Min | Max | N     |
|--------------------------------------|------|------|-----|-----|-------|
| <b>Vaccination willingness</b>       | 0.61 | 0.34 | 0   | 1   | 9,889 |
| <b>Demographics</b>                  |      |      |     |     |       |
| Sex (female)                         | 0.48 | 0.50 | 0   | 1   | 9,889 |
| Age                                  | 0.35 | 0.19 | 0   | 1   | 9,889 |
| Education (tertiary)                 | 0.48 | 0.50 | 0   | 1   | 9,889 |
| Political ideology                   | 0.50 | 0.25 | 0   | 1   | 9,889 |
| <b>Trust</b>                         |      |      |     |     |       |
| Trust in national health authorities | 0.68 | 0.29 | 0   | 1   | 9,889 |
| Trust in scientists                  | 0.74 | 0.27 | 0   | 1   | 9,889 |
| Trust in the government              | 0.52 | 0.30 | 0   | 1   | 9,889 |
| Interpersonal trust                  | 0.48 | 0.27 | 0   | 1   | 9,889 |
| <b>Concern</b>                       |      |      |     |     |       |
| You and your family                  | 0.66 | 0.28 | 0   | 1   | 9,889 |
| Hospitals                            | 0.68 | 0.29 | 0   | 1   | 9,889 |
| Society                              | 0.68 | 0.29 | 0   | 1   | 9,889 |
| Social unrest and crime              | 0.63 | 0.31 | 0   | 1   | 9,889 |
| The country's economy                | 0.78 | 0.26 | 0   | 1   | 9,889 |
| <b>Attitudes</b>                     |      |      |     |     |       |
| Democratic rights                    | 0.48 | 0.34 | 0   | 1   | 9,889 |
| Conspiracy beliefs                   | 0.48 | 0.35 | 0   | 1   | 9,889 |
| Support protests                     | 0.38 | 0.35 | 0   | 1   | 9,889 |
| Misinformation                       | 0.62 | 0.29 | 0   | 1   | 9,889 |
| Fatigue                              | 0.37 | 0.33 | 0   | 1   | 9,889 |
| <b>Compliance</b>                    |      |      |     |     |       |
| Behavior change                      | 0.70 | 0.28 | 0   | 1   | 9,889 |
| Knowledge                            | 0.78 | 0.22 | 0   | 1   | 9,889 |
| Support for restrictions             | 0.65 | 0.27 | 0   | 1   | 9,889 |

Figure A1: Bivariate correlations

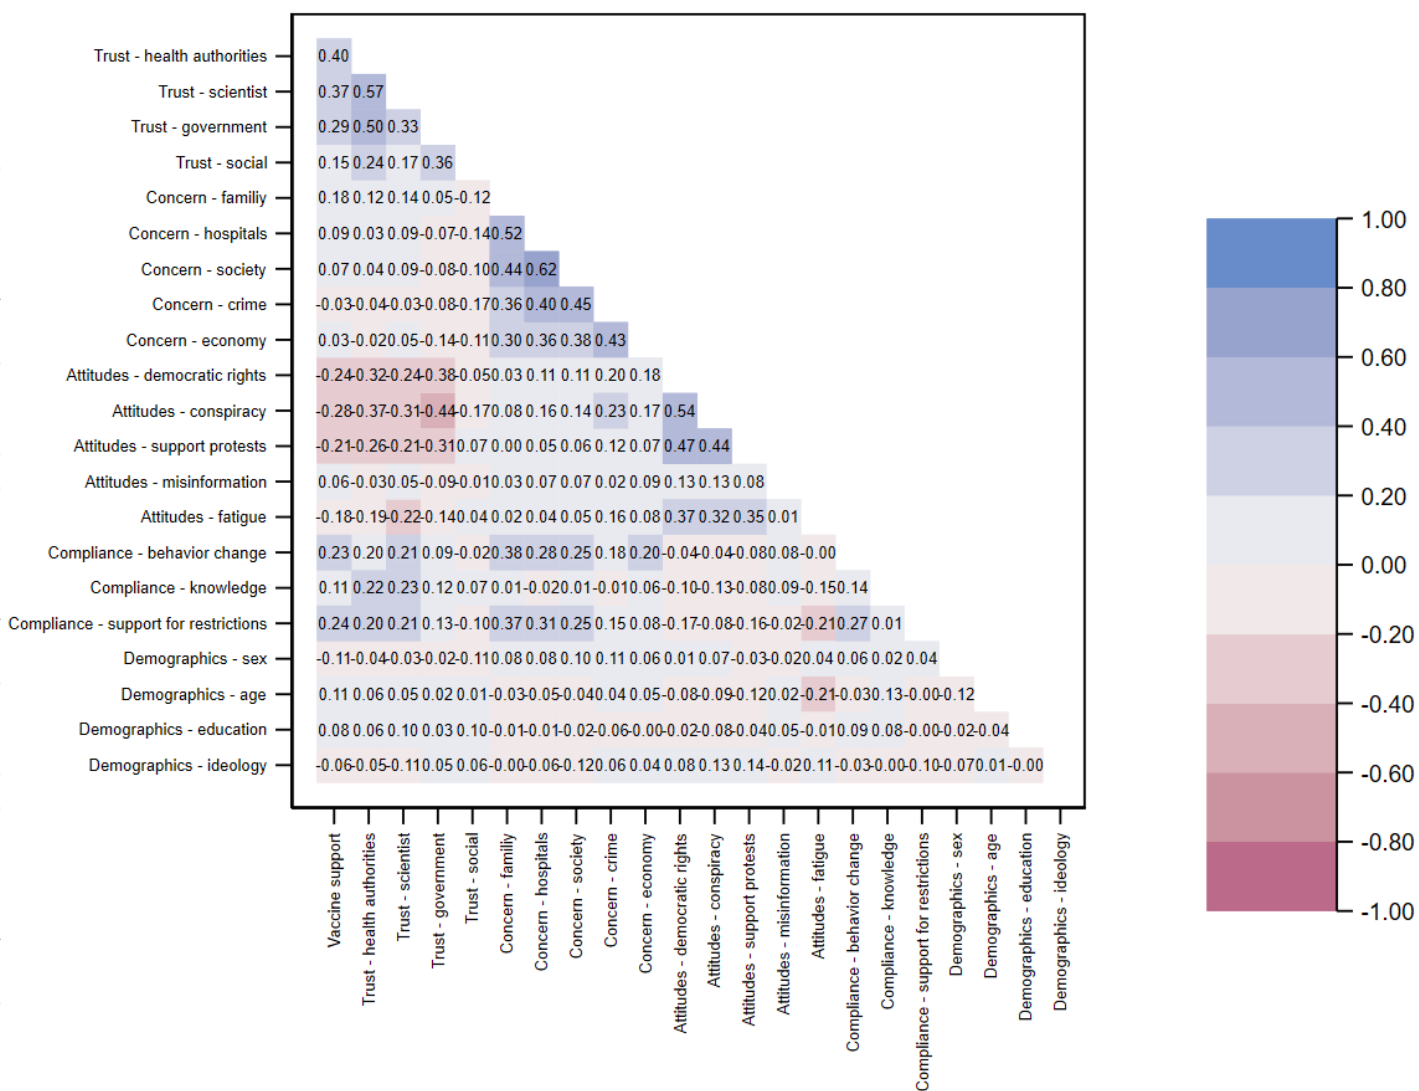

only

**Figure A2:** Replicating the analysis with categorical trust variables

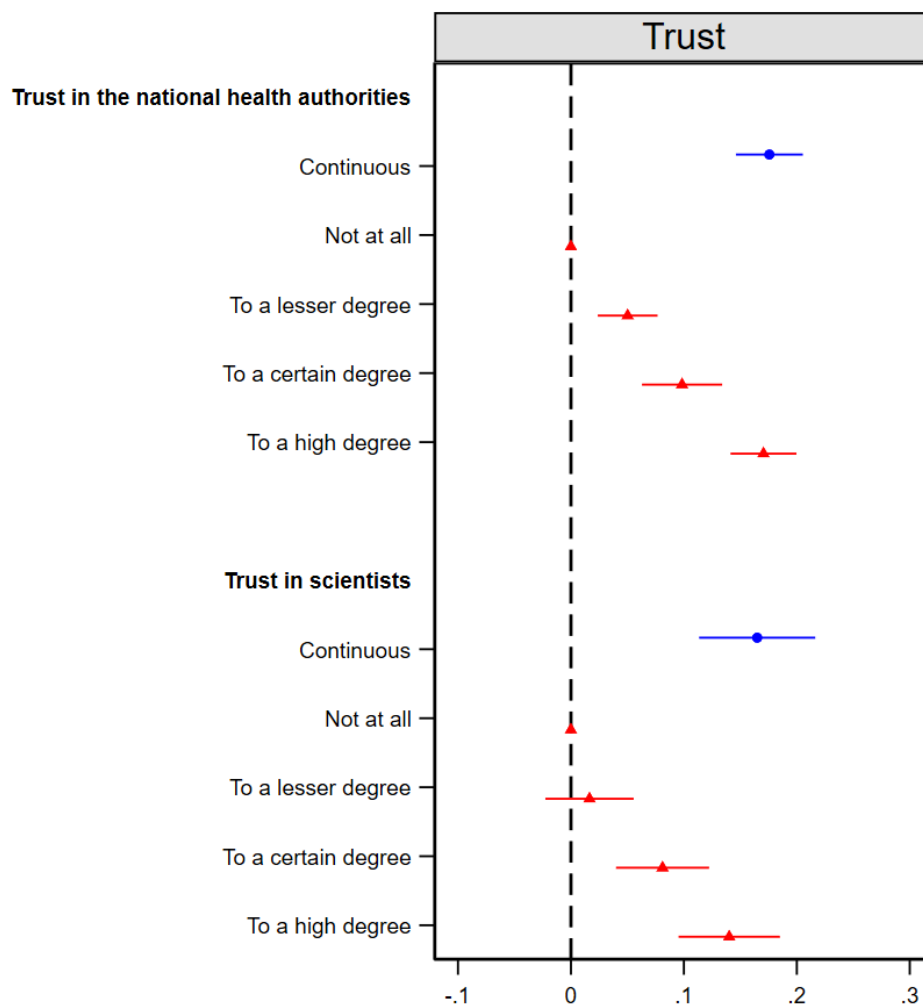

Note: N = 9,889. Blue circles are the estimated correlations based on model VI in Table 1 (continuous trust variables). Red triangles are the estimated correlations based on the same model, using categorical trust variables instead. Both models include control for country dummies. Horizontal bars are the associated 95 % confidence intervals.



**Figure A3:** Replicating the analysis with categorical concern variables

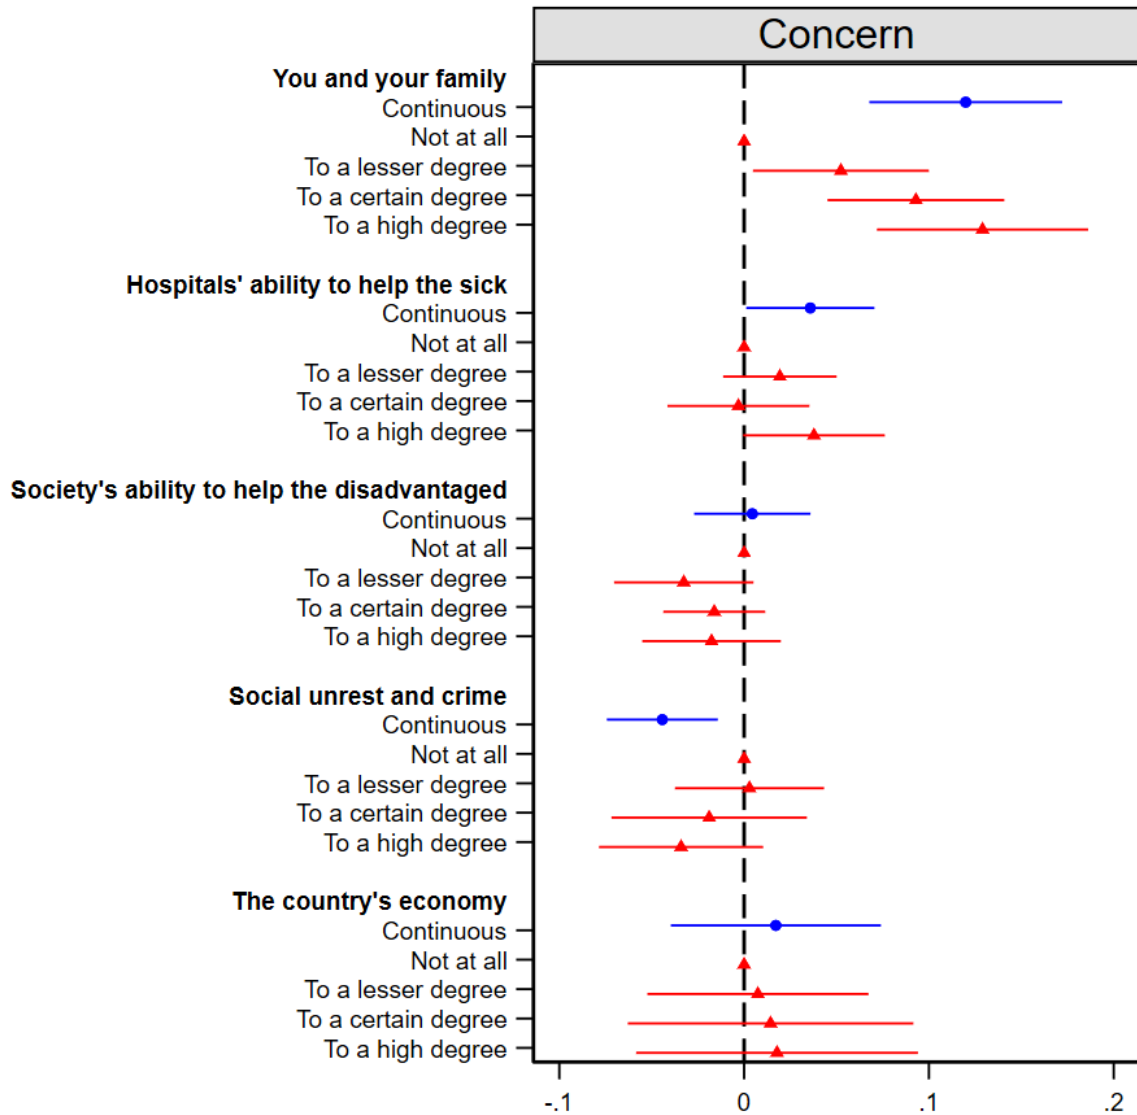

Note: N = 9,889. Blue circles are the estimated correlations based on model VI in Table 1 (continuous concern variables). Red triangles are the estimated correlations based on the same model, using categorical concern variables instead. Both models include control for country dummies. Horizontal bars are the associated 95 % confidence intervals.

**Figure A4:** Replicating the analysis with a categorical behavior change variable

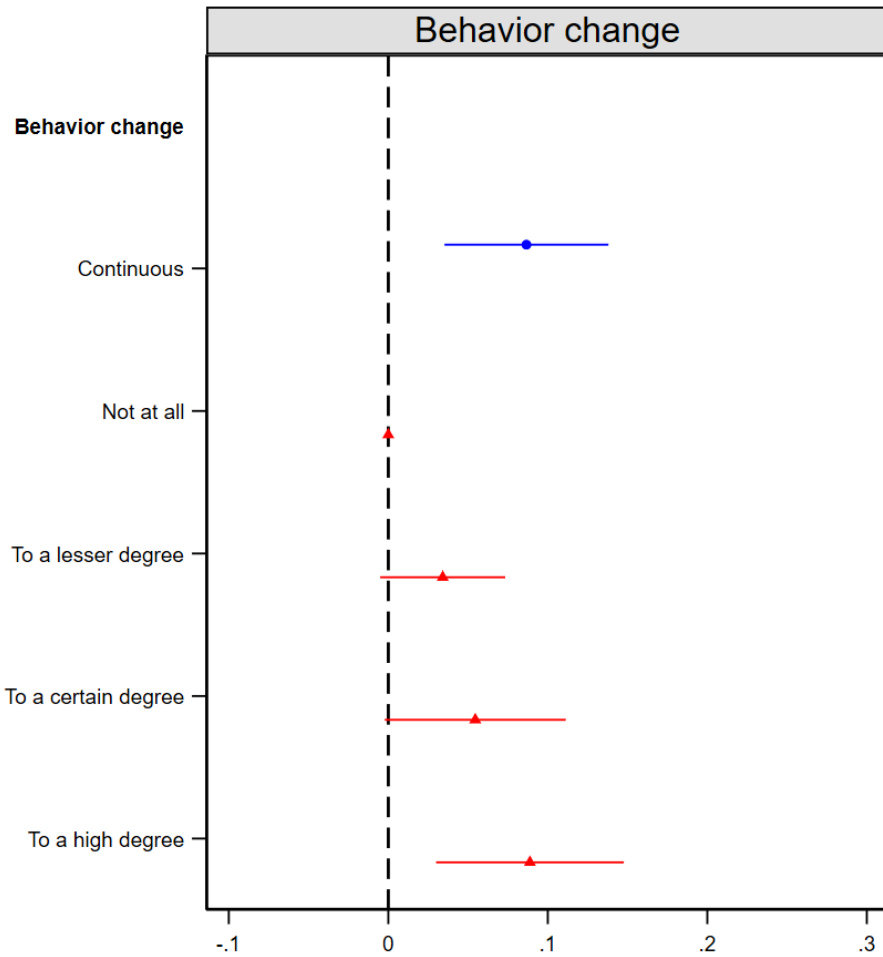

Note: N = 9,889. Blue circles are the estimated correlations based on model VI in Table 1 (continuous behavior change variable). Red triangles are the estimated correlations based on the same model, using a categorical behavior change variable instead. Both models include control for country dummies. Horizontal bars are the associated 95 % confidence intervals.

**Figure A5:** Replicating the analysis with a categorical knowledge variable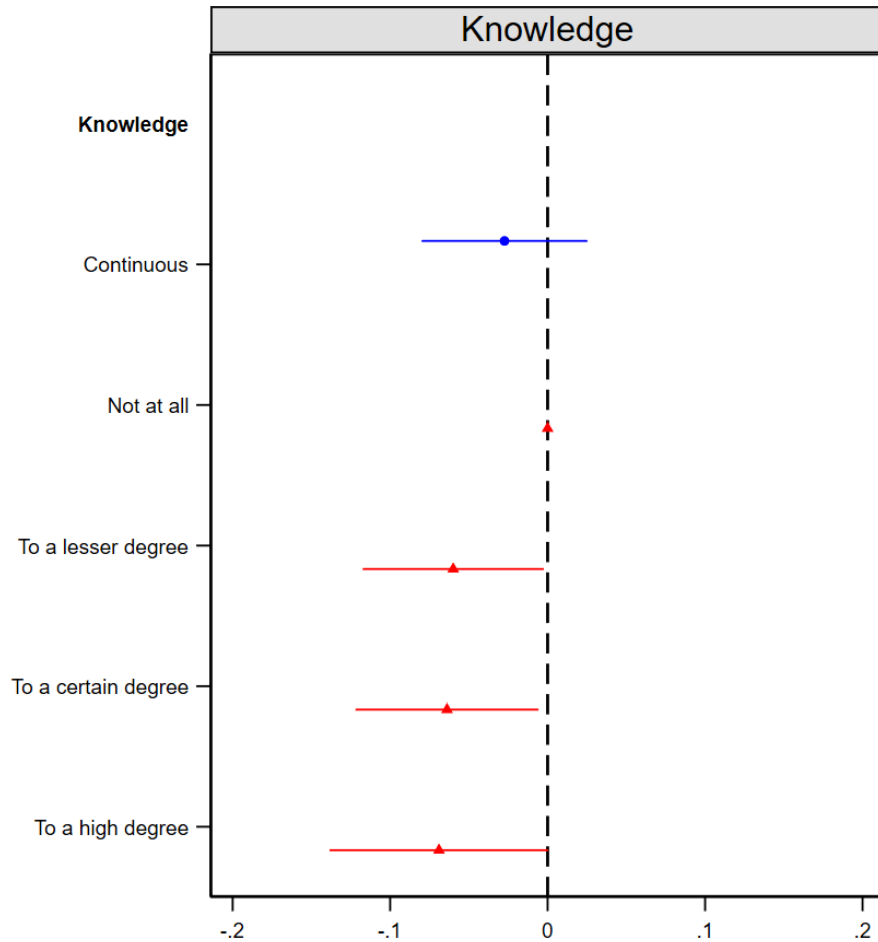

Note: N = 9,889. Blue circles are the estimated correlations based on model VI in Table 1 (continuous knowledge variable). Red triangles are the estimated correlations based on the same model, using a categorical knowledge variable instead. Both models include control for country dummies. Horizontal bars are the associated 95 % confidence intervals.

**Figure A6:** Individual-level correlations of vaccination willingness by country

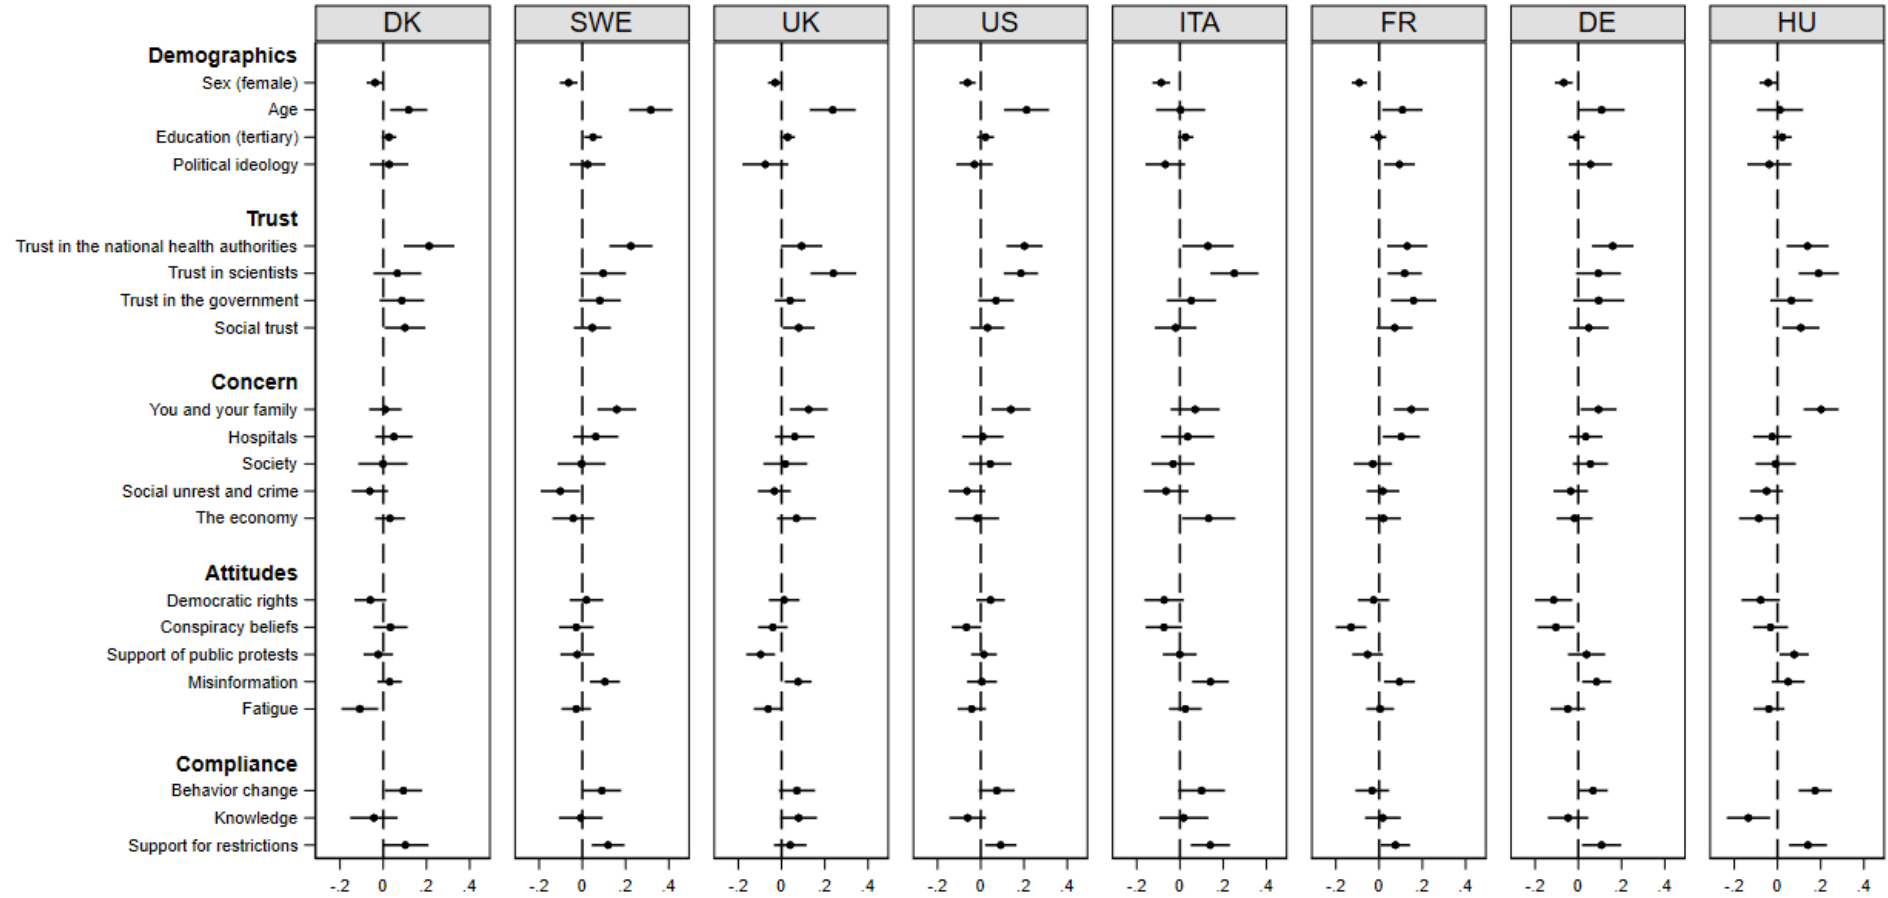

Note: N = 9,889. Black circles are the estimated correlations. Horizontal bars are the associated 95 % confidence intervals.

Figure A7: Bivariate correlations by country

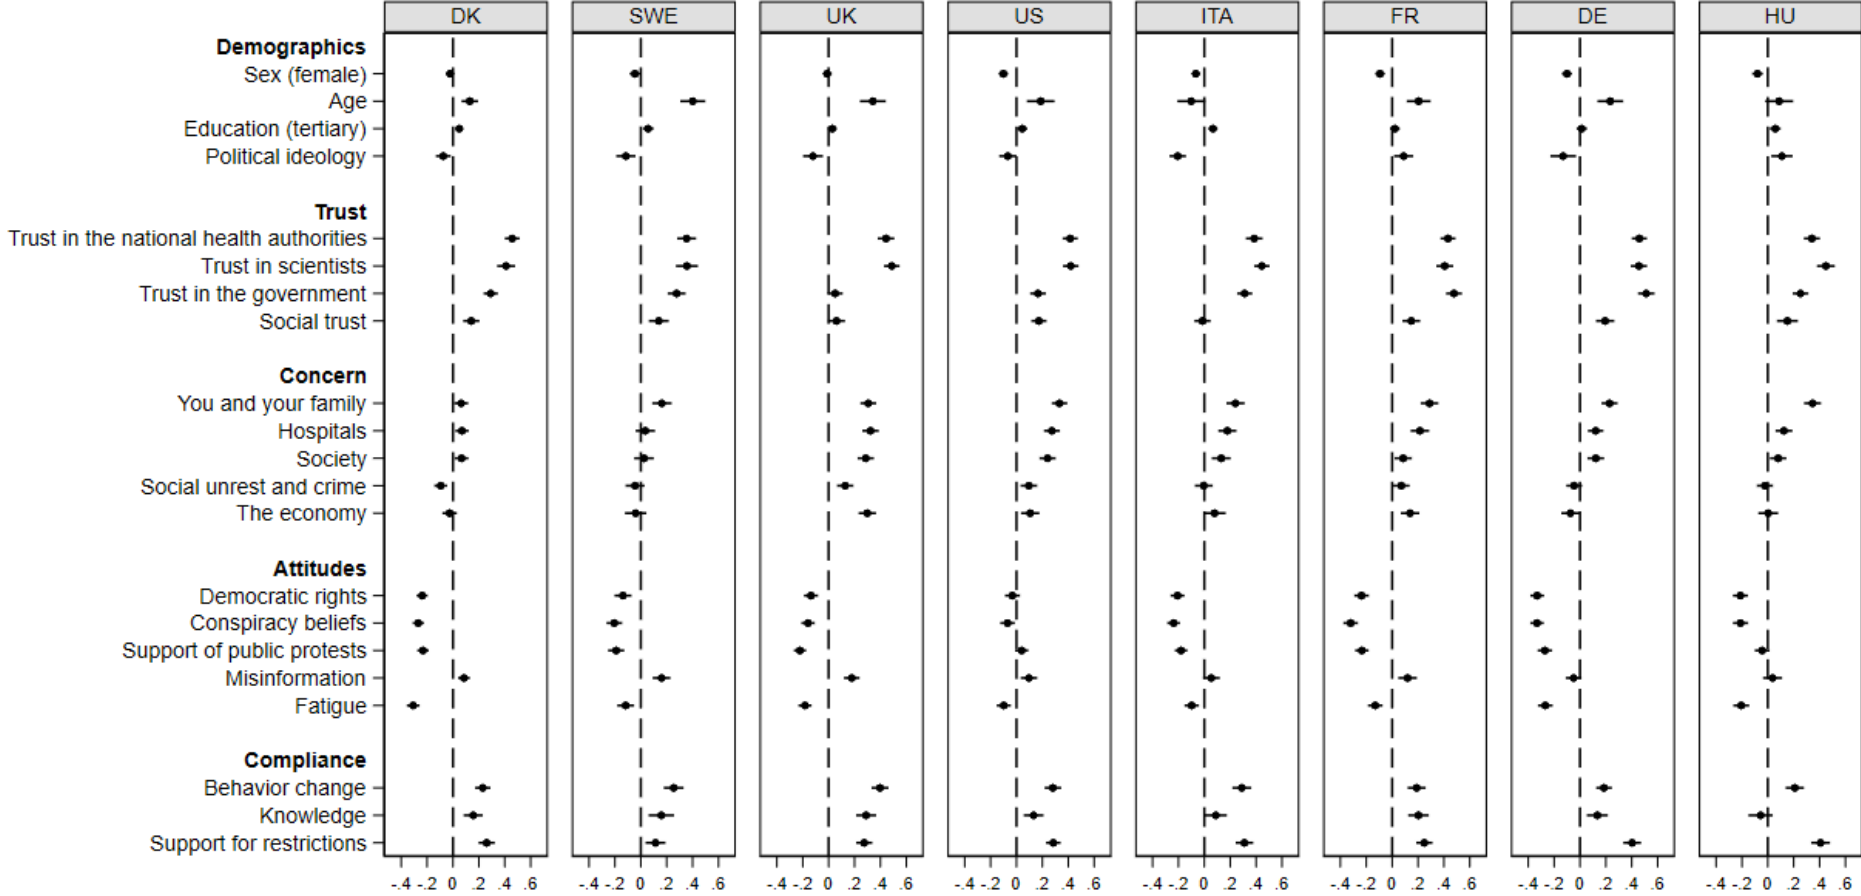

Note: N = 9,889. Black circles are the estimated bivariate correlations. Horizontal bars are the associated 95 % confidence intervals.

**Figure A8:** Subgroup analysis - sex

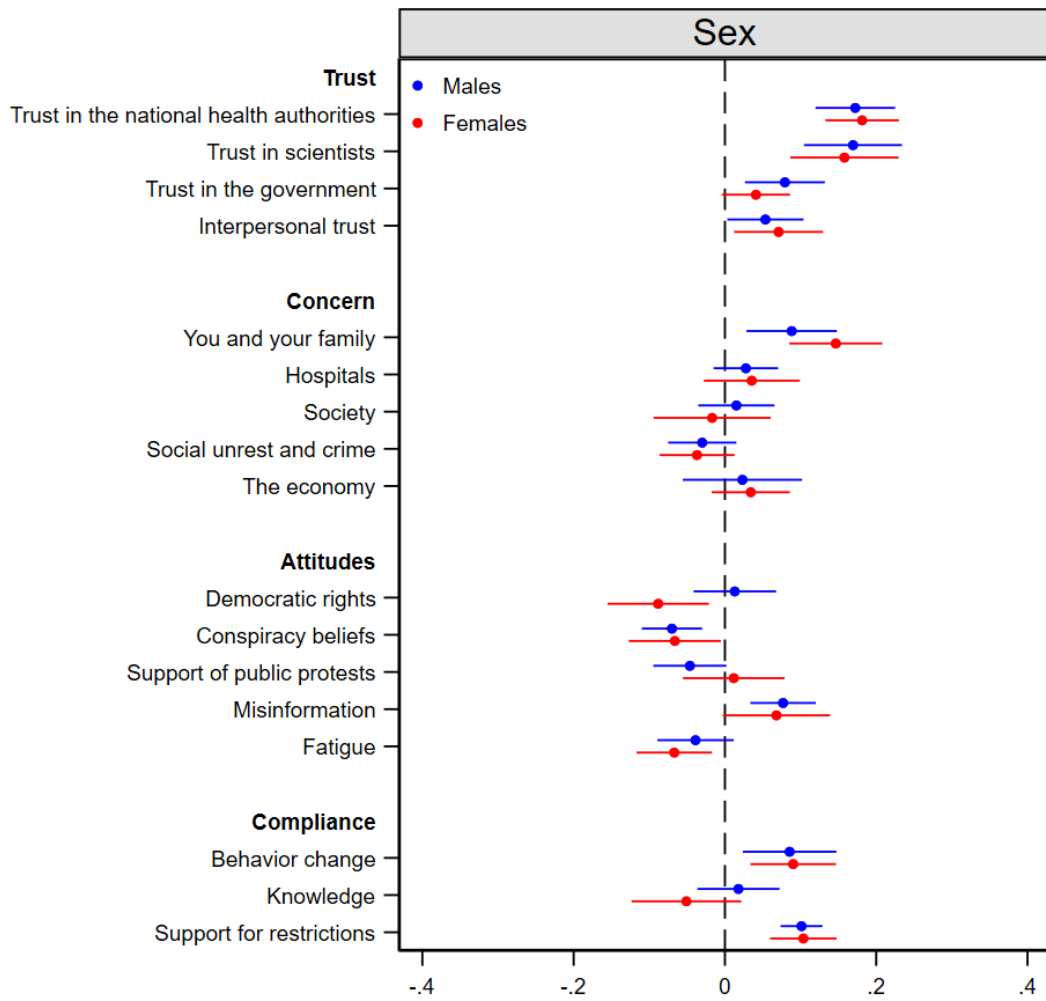

Note: N = 9,889. Circles are the estimated correlations. Horizontal bars are the associated 95 % confidence intervals.

**Figure A9:** Subgroup analysis - age

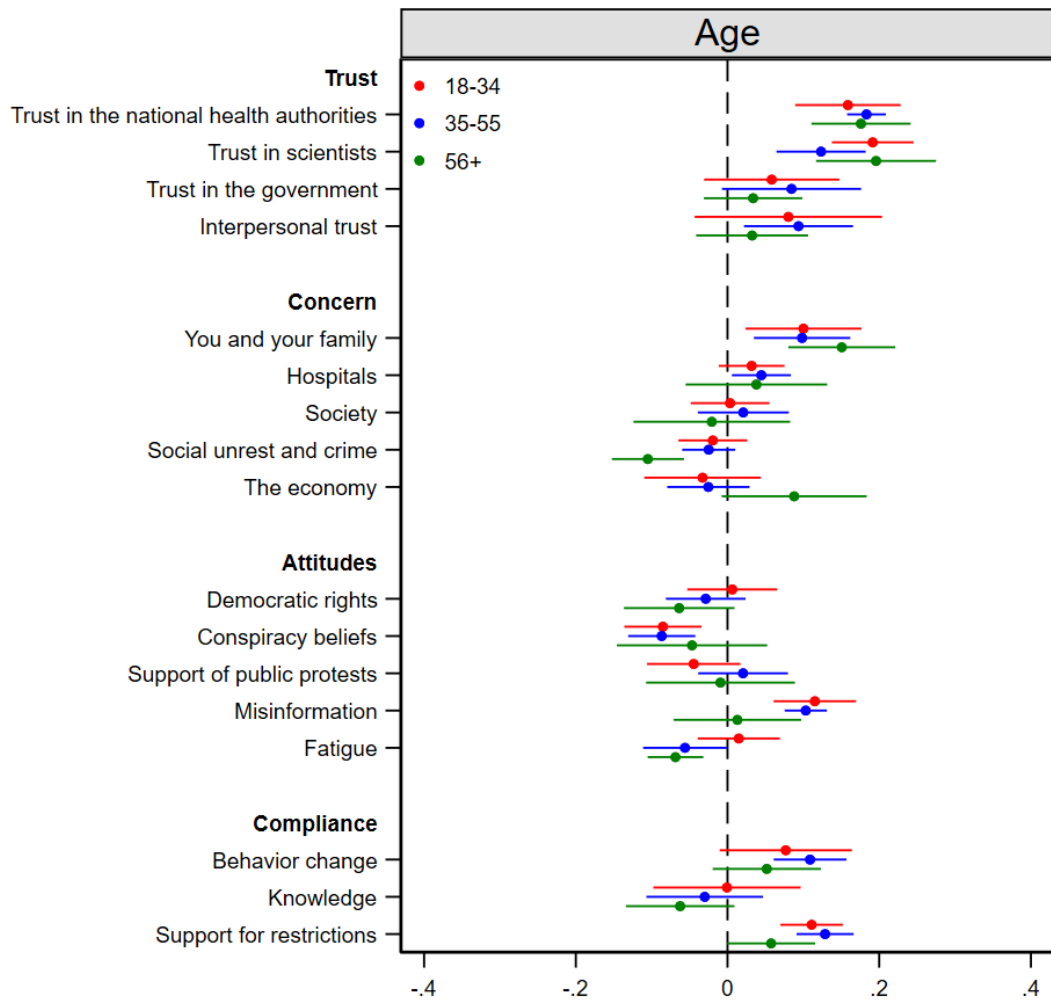

Note: N = 9,889. Circles, triangles and squares are the estimated correlations. Horizontal bars are the associated 95 % confidence intervals.

**Figure A10: Subgroup analysis - education**

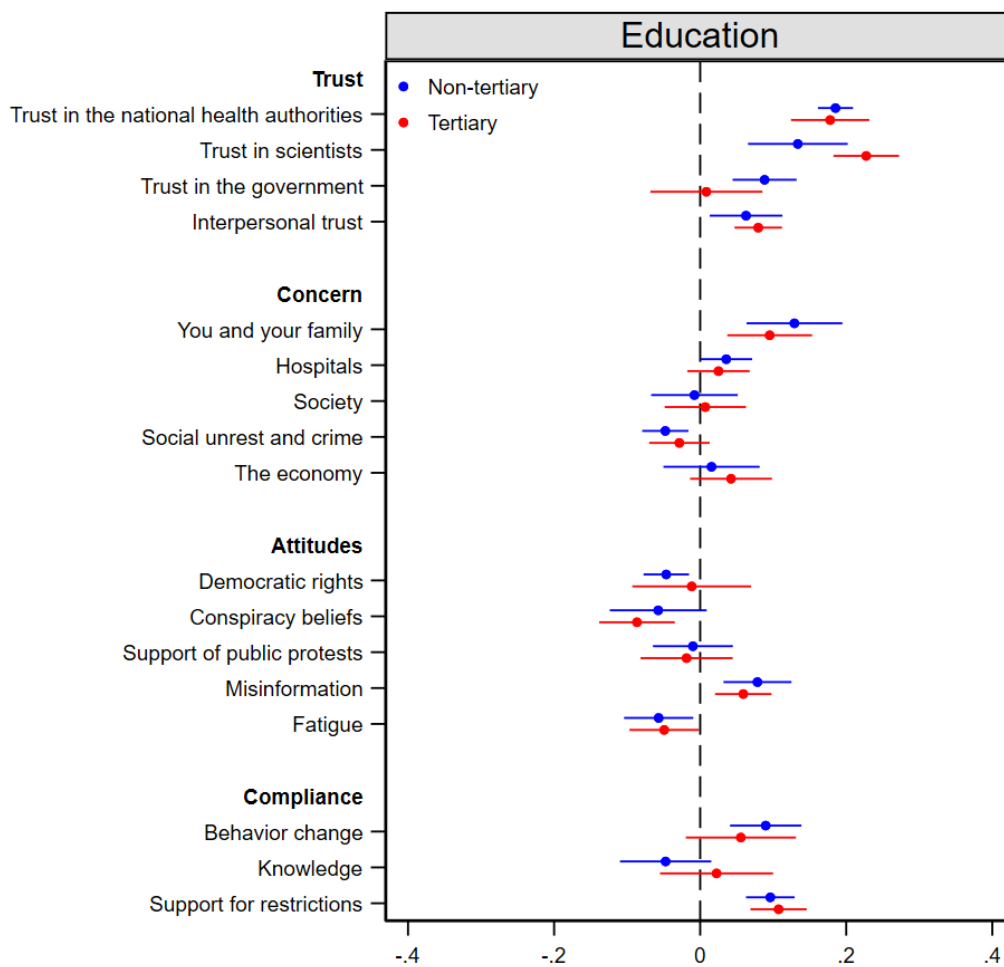

Note: N = 9,889. Circles and triangles are the estimated correlations. Horizontal bars are the associated 95 % confidence intervals.



Figure A11: Macro-level correlations of vaccination willingness

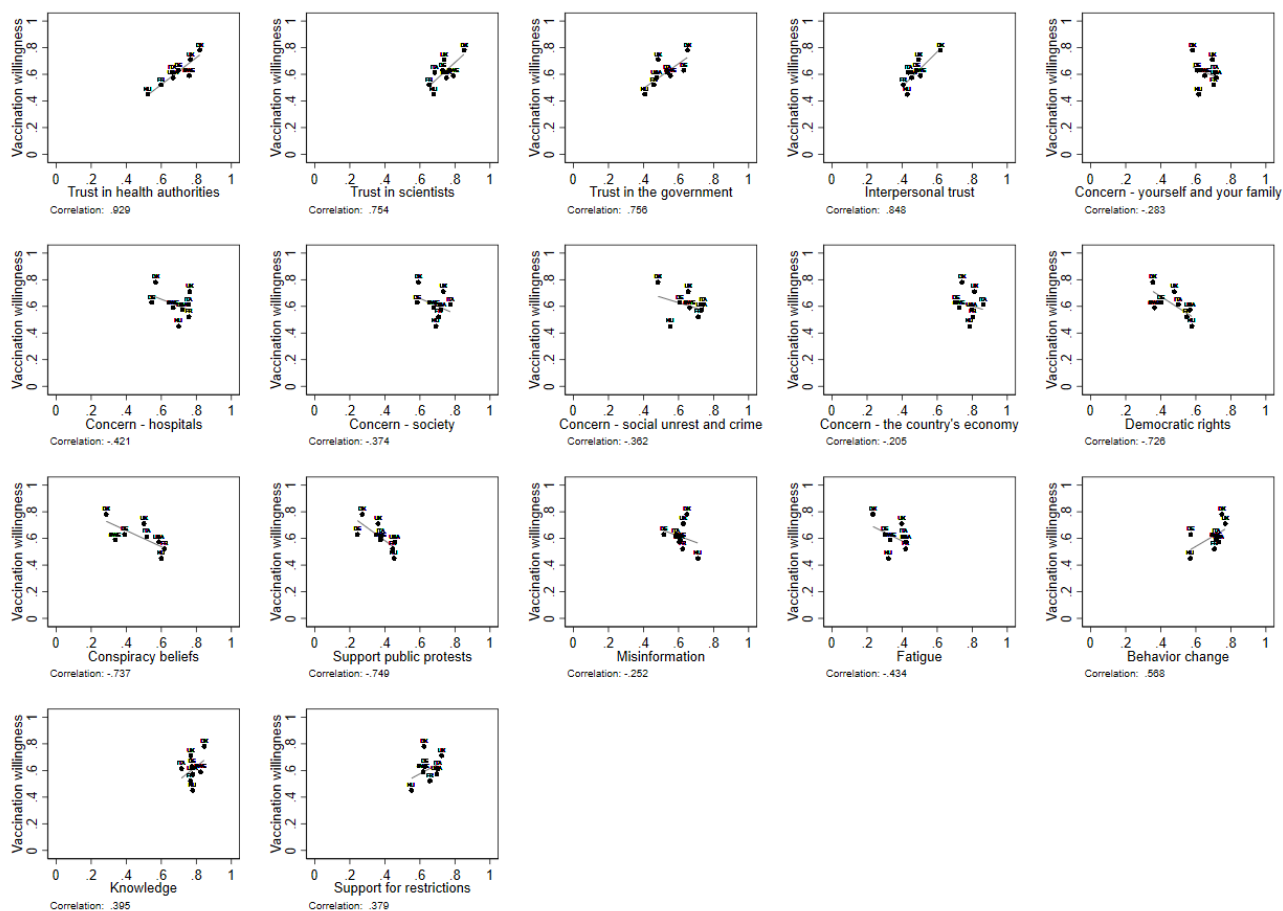

Note: The figure plots country averages for vaccination willingness and country averages for the range of non-background measures. Reported correlations are Pearson's  $r$ .

**STROBE 2007 (v4) Statement—Checklist of items that should be included in reports of *cross-sectional studies***

| Section/Topic                | Item # | Recommendation                                                                                                                                                                       | Reported on page # |
|------------------------------|--------|--------------------------------------------------------------------------------------------------------------------------------------------------------------------------------------|--------------------|
| <b>Title and abstract</b>    | 1      | (a) Indicate the study's design with a commonly used term in the title or the abstract                                                                                               | 1                  |
|                              |        | (b) Provide in the abstract an informative and balanced summary of what was done and what was found                                                                                  | 2-3                |
| <b>Introduction</b>          |        |                                                                                                                                                                                      |                    |
| Background/rationale         | 2      | Explain the scientific background and rationale for the investigation being reported                                                                                                 | 4                  |
| Objectives                   | 3      | State specific objectives, including any prespecified hypotheses                                                                                                                     | 4-5                |
| <b>Methods</b>               |        |                                                                                                                                                                                      |                    |
| Study design                 | 4      | Present key elements of study design early in the paper                                                                                                                              | 8                  |
| Setting                      | 5      | Describe the setting, locations, and relevant dates, including periods of recruitment, exposure, follow-up, and data collection                                                      | 8                  |
| Participants                 | 6      | (a) Give the eligibility criteria, and the sources and methods of selection of participants                                                                                          | 8                  |
| Variables                    | 7      | Clearly define all outcomes, exposures, predictors, potential confounders, and effect modifiers. Give diagnostic criteria, if applicable                                             | 9 (+ table 1)      |
| Data sources/<br>measurement | 8*     | For each variable of interest, give sources of data and details of methods of assessment (measurement). Describe comparability of assessment methods if there is more than one group | 9 (+ table 1)      |
| Bias                         | 9      | Describe any efforts to address potential sources of bias                                                                                                                            |                    |
| Study size                   | 10     | Explain how the study size was arrived at                                                                                                                                            | 8                  |
| Quantitative variables       | 11     | Explain how quantitative variables were handled in the analyses. If applicable, describe which groupings were chosen and why                                                         | 10                 |
| Statistical methods          | 12     | (a) Describe all statistical methods, including those used to control for confounding                                                                                                | 10                 |
|                              |        | (b) Describe any methods used to examine subgroups and interactions                                                                                                                  |                    |
|                              |        | (c) Explain how missing data were addressed                                                                                                                                          | 9                  |
|                              |        | (d) If applicable, describe analytical methods taking account of sampling strategy                                                                                                   |                    |
|                              |        | (e) Describe any sensitivity analyses                                                                                                                                                | 10                 |
| <b>Results</b>               |        |                                                                                                                                                                                      |                    |

|                          |     |                                                                                                                                                                                                                                                                                                                                                                                                               |                           |
|--------------------------|-----|---------------------------------------------------------------------------------------------------------------------------------------------------------------------------------------------------------------------------------------------------------------------------------------------------------------------------------------------------------------------------------------------------------------|---------------------------|
| Participants             | 13* | (a) Report numbers of individuals at each stage of study—eg numbers potentially eligible, examined for eligibility, confirmed eligible, included in the study, completing follow-up, and analysed<br>(b) Give reasons for non-participation at each stage<br>(c) Consider use of a flow diagram                                                                                                               | 2 (table A1)              |
| Descriptive data         | 14* | (a) Give characteristics of study participants (eg demographic, clinical, social) and information on exposures and potential confounders<br>(b) Indicate number of participants with missing data for each variable of interest                                                                                                                                                                               | Table A2                  |
| Outcome data             | 15* | Report numbers of outcome events or summary measures                                                                                                                                                                                                                                                                                                                                                          | 10-11 (+ figure 1)        |
| Main results             | 16  | (a) Give unadjusted estimates and, if applicable, confounder-adjusted estimates and their precision (eg, 95% confidence interval). Make clear which confounders were adjusted for and why they were included<br>(b) Report category boundaries when continuous variables were categorized<br>(c) If relevant, consider translating estimates of relative risk into absolute risk for a meaningful time period | 12-13 (figure 2, table 2) |
| Other analyses           | 17  | Report other analyses done—eg analyses of subgroups and interactions, and sensitivity analyses                                                                                                                                                                                                                                                                                                                | 10 + 13 (Online appendix) |
| <b>Discussion</b>        |     |                                                                                                                                                                                                                                                                                                                                                                                                               |                           |
| Key results              | 18  | Summarise key results with reference to study objectives                                                                                                                                                                                                                                                                                                                                                      | 14                        |
| Limitations              | 19  | Discuss limitations of the study, taking into account sources of potential bias or imprecision. Discuss both direction and magnitude of any potential bias                                                                                                                                                                                                                                                    | 14-15                     |
| Interpretation           | 20  | Give a cautious overall interpretation of results considering objectives, limitations, multiplicity of analyses, results from similar studies, and other relevant evidence                                                                                                                                                                                                                                    | 15                        |
| Generalisability         | 21  | Discuss the generalisability (external validity) of the study results                                                                                                                                                                                                                                                                                                                                         | 14                        |
| <b>Other information</b> |     |                                                                                                                                                                                                                                                                                                                                                                                                               |                           |
| Funding                  | 22  | Give the source of funding and the role of the funders for the present study and, if applicable, for the original study on which the present article is based                                                                                                                                                                                                                                                 | 3                         |

\*Give information separately for cases and controls in case-control studies and, if applicable, for exposed and unexposed groups in cohort and cross-sectional studies.

**Note:** An Explanation and Elaboration article discusses each checklist item and gives methodological background and published examples of transparent reporting. The STROBE checklist is best used in conjunction with this article (freely available on the Web sites of PLoS Medicine at <http://www.plosmedicine.org/>, Annals of Internal Medicine at <http://www.annals.org/>, and Epidemiology at <http://www.epidem.com/>). Information on the STROBE Initiative is available at [www.strobe-statement.org](http://www.strobe-statement.org).

# BMJ Open

## Public Acceptance of COVID-19 Vaccines: Cross-National Evidence on Levels and Individual-Level Predictors Using Observational Data

|                                 |                                                                                                                                                                                                                                                                                      |
|---------------------------------|--------------------------------------------------------------------------------------------------------------------------------------------------------------------------------------------------------------------------------------------------------------------------------------|
| Journal:                        | <i>BMJ Open</i>                                                                                                                                                                                                                                                                      |
| Manuscript ID                   | bmjopen-2020-048172.R1                                                                                                                                                                                                                                                               |
| Article Type:                   | Original research                                                                                                                                                                                                                                                                    |
| Date Submitted by the Author:   | 16-Mar-2021                                                                                                                                                                                                                                                                          |
| Complete List of Authors:       | Lindholt, Marie Fly; Aarhus Universitet, Political Science<br>Jørgensen, Frederik; Aarhus University, Department of Political Science<br>Bor, Alexander; Aarhus University, Department of Political Science<br>Petersen, Michael; Aarhus University, Department of Political Science |
| <b>Primary Subject Heading</b>: | Public health                                                                                                                                                                                                                                                                        |
| Secondary Subject Heading:      | Epidemiology                                                                                                                                                                                                                                                                         |
| Keywords:                       | COVID-19, PUBLIC HEALTH, EPIDEMIOLOGY                                                                                                                                                                                                                                                |
|                                 |                                                                                                                                                                                                                                                                                      |

SCHOLARONE™  
Manuscripts



I, the Submitting Author has the right to grant and does grant on behalf of all authors of the Work (as defined in the below author licence), an exclusive licence and/or a non-exclusive licence for contributions from authors who are: i) UK Crown employees; ii) where BMJ has agreed a CC-BY licence shall apply, and/or iii) in accordance with the terms applicable for US Federal Government officers or employees acting as part of their official duties; on a worldwide, perpetual, irrevocable, royalty-free basis to BMJ Publishing Group Ltd ("BMJ") its licensees and where the relevant Journal is co-owned by BMJ to the co-owners of the Journal, to publish the Work in this journal and any other BMJ products and to exploit all rights, as set out in our [licence](#).

The Submitting Author accepts and understands that any supply made under these terms is made by BMJ to the Submitting Author unless you are acting as an employee on behalf of your employer or a postgraduate student of an affiliated institution which is paying any applicable article publishing charge ("APC") for Open Access articles. Where the Submitting Author wishes to make the Work available on an Open Access basis (and intends to pay the relevant APC), the terms of reuse of such Open Access shall be governed by a Creative Commons licence – details of these licences and which [Creative Commons](#) licence will apply to this Work are set out in our licence referred to above.

Other than as permitted in any relevant BMJ Author's Self Archiving Policies, I confirm this Work has not been accepted for publication elsewhere, is not being considered for publication elsewhere and does not duplicate material already published. I confirm all authors consent to publication of this Work and authorise the granting of this licence.

1  
2  
3  
4  
5  
6  
7  
8  
9  
10  
11  
12  
13  
14  
15  
16  
17  
18  
19  
20  
21  
22  
23  
24  
25  
26  
27  
28  
29  
30  
31  
32  
33  
34  
35  
36  
37  
38  
39  
40  
41  
42  
43  
44  
45  
46  
47  
48  
49  
50  
51  
52  
53  
54  
55  
56  
57  
58  
59  
60

March 8, 2021

**Public Acceptance of COVID-19 Vaccines: Cross-National  
Evidence on Levels and Individual-Level Predictors Using  
Observational Data**

Marie Fly Lindholt<sup>1</sup>

Frederik Jørgensen<sup>1</sup>

Alexander Bor<sup>1</sup>

& Michael Bang Petersen<sup>1\*</sup>

<sup>1</sup>Department of Political Science, Aarhus University

\*Corresponding author: michael@ps.au.dk

## Abstract

### **Objectives**

*The management of the COVID-19 pandemic hinges on the approval of safe and effective vaccines but, equally importantly, on high vaccine acceptance among people. To facilitate vaccination acceptance via effective health communication, it is key to understand levels of vaccine skepticism and the demographic, psychological and political predictors. To this end, we examine the levels and predictors of acceptance of an approved COVID-19 vaccine.*

### **Design, setting and participants**

*We examine the levels and predictors of acceptance of an approved COVID-19 vaccine in large online surveys from eight Western democracies that differ in terms of the severity of the pandemic and their response: Denmark, France, Germany, Hungary, Sweden, Italy, United Kingdom, and United States (total N = 18,231). Survey respondents were quota sampled to match the population margins on age, gender, and geographic location for each country. The study was conducted from September 2020 to February 2021, allowing us to assess changes in acceptance and predictors as COVID-19 vaccine programs were rolled out.*

### **Outcome measure**

*The outcome of the study is acceptance of a COVID-19 vaccine approved and recommended by health authorities.*

### **Results**

*The data reveal large variations in vaccine acceptance that ranges from 82 % in Denmark to 52 % in Hungary. Lack of vaccine acceptance is associated with lack of trust in authorities and scientists, conspiratorial thinking, and a lack of concern about COVID-19.*

### **Conclusion**

*Most national levels of vaccine acceptance fall below estimates of the required threshold for herd immunity. The results emphasize the long-term importance of building trust in preparations for health emergencies such as the current pandemic. For health communication, the results emphasize the importance of focusing on personal consequences of infections and debunking of myths to guide communication strategies.*

## Article Summary

### Strengths and limitations of this study

- Large samples that are reflective of the populations of eight different countries, allowing us to examine the generalizability of findings and the factors underlying cross-national differences.
- A broad-based assessment of potential correlates of vaccine acceptance, including both demographics, political, and COVID-specific factors.
- Analyses that includes observations both pre- and post-approval of COVID-19 vaccines.
- Observational data which limits causal traction.
- Self-reported vaccine acceptance can be subject to social desirability bias, and does not necessarily translate into actual vaccination rates.

Acknowledgements: We are grateful for research assistance from Magnus Storm Rasmussen.

Funding statement: This work was supported by The Carlsberg Foundation grant number CF20-0044 to Michael Bang Petersen. The funders had no role in the conduct of this research.

Ethical statement: The study complies with Aarhus University's Code of Conduct as well as the Committee Act of the Danish National Committee of Health Research Ethics, which states that "Surveys using questionnaires and interviews that do not involve human biological material (section 14(2) of the Committee Act)" are exempted from approval (<https://en.nvk.dk/how-to-notify/what-to-notify>)

Competing interests: None.

Author Contributions: MFL, FJ, AB and MBP designed the study and collected data. MFL and FJ analyzed data. MFL, FJ, AB and MBP wrote the paper.

Data sharing statement: Upon publication data will be publicly available at a repository at Open Science Framework.

Word count: 4,973.



## Background

A vaccine against COVID-19 is a “vital tool” in the management of the current pandemic.[1] Accordingly, extraordinary resources have been invested into vaccine development with unprecedented speed. Yet, even as approved vaccines become available, societies across the world still face another challenge: Vaccine skepticism.

As of late 2020, researchers estimated that up to 82 percent of a country’s population may need to be vaccinated in order to reach herd immunity against SARS-CoV-2,[2-3] and the emergence of new virus variants implies that individuals may need to get vaccinated repeatedly. However, general vaccine hesitancy has been on the rise in recent years in many countries.[4-5] This has been the case for many non-COVID-19 vaccine programs, and is likely to pose a challenge for COVID-19 vaccines.[6-7] Consistent with this, initial cross-national survey evidence suggests that substantially fewer people worldwide are willing to get vaccinated than would be necessary; and that some countries – e.g. Russia, Poland and France – face strikingly high levels of skepticism.[8] Thus, a key challenge for pandemic management is for health authorities across the world to encourage people to accept approved COVID-19 vaccines through careful approval procedures and effective health communication. This latter challenge emphasizes the importance of understanding why people are hesitant about taking vaccines. Such knowledge is crucial for guiding communication in a way that increase vaccine acceptance and for understanding how to prepare for future health emergencies.

In this manuscript, we *first* present descriptive analyses of the acceptance of a COVID-19 vaccine approved and recommended by health authorities across eight Western democracies. *Second*, we investigate individual-level predictors of vaccine acceptance. The study was conducted from the fall of 2020 to the winter of 2021. This data collection thus allows us to track levels and predictors of vaccine acceptance as vaccines were approved using large-scale cross-national surveys including a broad set of potential predictors, including political predictors, which are less-often explored in traditional health research. Given the scale and broad impact of a pandemic crisis, however, such broader predictors may be particularly relevant to explore.

## Potential predictors: Who are expected to accept a COVID-19 vaccine?

To organize our expectations about the individual-level predictors of vaccine acceptance during the COVID-19 pandemic, we draw on one of the most comprehensive frameworks for understanding the antecedents of vaccine acceptance; the 5C model from Betsch et al. (2018).[9] According to the 5C model, five psychological antecedents drive vaccine acceptance: *confidence, constraints, complacency, calculation and collective responsibility*. While we consider multiple predictors that are often not considered within this model, we strengthen the model's coverage by theorizing the link between the components of the model and the novel predictors that may be important for vaccine acceptance during the COVID-19 pandemic.

*Confidence* is defined as trust in (i) the effectiveness and safety of vaccines, (ii) the system that delivers them, and (iii) the motivation of policy-makers who decide on the need of vaccines.[9-10] Here, we consider two categories of predictors that reflect the underlying dimensions of confidence. First, we broadly tap into the second dimension of the definition by focusing on trust in a range of actors. Second, we investigate a range of disease-specific attitudes that broadly reflect the third dimension of the definition.

Empirically, trust is a crucial predictor of vaccine acceptance. Guay et al. (2019), for example, found that distrust in public health authorities is associated with general vaccine hesitancy.[11] Similarly, people who trust official authorities, were more likely to accept the HPV vaccine.[12] Initial work on COVID-19 vaccines also demonstrates that those who have higher trust in scientists are more willing to get vaccinated.[13]

Furthermore, the literature on vaccine hesitancy has found that hesitancy is integrated into a broader set of political attitudes and perceptions. Political ideology has been found to be related to vaccine hesitancy as conservative individuals are less likely to trust authorities.[14] Furthermore, it is a standard finding in political science that individuals are less likely to accept decisions from other political parties than they one they identify with or vote for.[15] Thus, it is plausible that people who have voted for the government party/candidate are more likely to accept a vaccine, since the vaccine program is a part of the governments' response to the pandemic. In addition to these standard political attitudes, more extreme attitudes may also influence confidence in vaccines. Most prominently, people prone to conspiracy thinking are more likely to be hesitant about vaccines.[16-17] In the current context, higher levels of

1  
2  
3 coronavirus conspiracy thinking have also been found to be associated with lower acceptance  
4 of future vaccines against COVID-19.[18, 19, although see 20] Consequently, it can be  
5 expected that the COVID-19 pandemic may elicit anti-systemic sentiments. We examine three  
6 levels of anti-systemic sentiments and how they relate to vaccine acceptance, including (1)  
7 concern for democratic rights, (2) support of public protests against government policies, and  
8 (3) beliefs in specific conspiracy theories related to COVID-19. Finally, we also examine the  
9 role of awareness of misinformation. From the literature, we know that susceptibility to  
10 misinformation negatively affects people's acceptance of a vaccine against COVID-19.[21]  
11 However, studies have also shown that pre-bunking can help cultivate "mental antibodies"  
12 against misinformation.[22-23] Thus, it is likely that awareness of misinformation is positively  
13 associated with vaccine acceptance.  
14  
15  
16  
17  
18  
19  
20  
21  
22

23 *Constraints* refer to the structural and psychological barriers, impeding the implementation of  
24 vaccination intentions into behavior.[9] We consider the feeling of "pandemic fatigue" as such  
25 a barrier and thus a potential correlate of vaccine acceptance. While the WHO has been warning  
26 about fatigue among populations in the fall of 2020,[24-25] it is plausible that people who feel  
27 fatigued are willing to do what it takes to end the pandemic including being vaccinated.  
28 However, perhaps paradoxically, fatigue could also generate an unwillingness or incapability  
29 to comply with further requirements including vaccinations. Furthermore, we include the sense  
30 of having sufficient knowledge about behavioral recommendations as another psychological  
31 barrier. A sense of self-efficacy about proper behavior was one of the best predictors of  
32 compliance with physical distancing policies during the first wave of the pandemic.[26]  
33 Furthermore, perceived insufficient knowledge is significantly associated with general vaccine  
34 hesitancy.[11] Finally, we assess remaining psychological constraints by assessing to what  
35 extent people report being able to change their behavior in accordance with the  
36 recommendations from the health authorities during the pandemic. This general measure of  
37 behavior change should serve as a proxy for the range of constraints that may serve as a barrier  
38 for action over and beyond the directly assessed factors.  
39  
40  
41  
42  
43  
44  
45  
46  
47  
48  
49  
50

51 *Complacency* "exists where perceived risks of vaccine-preventable diseases are low and  
52 vaccination is not deemed a necessary preventive action".[9-10] Here we consider two types  
53 of predictors, including demographic factors and corona-specific risk-perceptions.  
54  
55  
56  
57

58 First, a set of demographic predictors are expected to be associated with complacency. Thus,  
59 prior studies have found that males are more likely than females to accept a potential COVID-  
60

1  
2  
3 19 vaccine [27-29], potentially due to sex-based differences in COVID-19 mortality.[27]  
4 Likewise older people are expected to be more willing to take a vaccination due to higher risks  
5 of severe infections. This is supported by Lazarus et al. (2020)[8] and Hacquin et al. (2020)[29],  
6 while neither Dror et al. (2020)[27] nor Wong et al. (2020)[28] found any age differences in  
7 vaccine acceptance. As a final demographic variable, we also consider education, even though  
8 this variable may influence vaccine acceptance through other dimensions than complacency  
9 (e.g., confidence). The findings of prior studies on vaccine hesitancy are mixed with regards  
10 to education, indicating that that the association between education and vaccine hesitancy is  
11 context specific.[30] To illustrate, whereas Guay et al. (2019) find that lower education is  
12 associated with general vaccine hesitancy in Canada,[11] Wagner et al. (2019) find that  
13 educational level is *not* associated with general vaccine hesitancy across five low-middle and  
14 middle-income countries.[30] Similarly, Bertonecello et al. (2020) find that while low parent  
15 education is significantly associated with general vaccine hesitancy, it is *not* associated with  
16 hesitancy in the context of child vaccine programs in Italy.[31] In the context of COVID-19,  
17 studies have found that higher education is associated with higher levels of vaccine  
18 acceptance.[8, 29]

19  
20  
21  
22  
23  
24  
25  
26  
27  
28  
29  
30  
31  
32 Second, we also investigate the role of personal risk-perceptions. Several studies have found  
33 that self-perceived risks of COVID-19 positively predicts acceptance of potential COVID-19  
34 vaccines.[19, 27, 29] Likewise, Wong et al. (2020) argued that perceived susceptibility to  
35 infection predicted the intention to take a future COVID-19 vaccine.[28] Thus, we expect that  
36 personal risk-perception predicts vaccine acceptance.

37  
38  
39  
40  
41  
42  
43  
44  
45  
46  
47  
48  
49  
50  
51  
52  
53  
54  
55  
56  
57  
58  
59  
60  
*Collective responsibility* is defined as the willingness to protect others by one's own  
vaccination by means of herd immunity.[9, 32] We consider three groups of predictors to be  
relevant for this category of vaccine antecedents: (1) prosocial concern (i.e., concern for  
others), (2) support for pandemic restrictions, and (3) interpersonal trust.

Focusing *first* on prosocial concerns, we measure a range of concerns over the disease's impact  
on society, including hospitals' ability to help the sick, society's ability to help the disadvantaged,  
social unrest and crime, and the country's economy. These concerns clearly tap into the collective  
responsibility and can be expected to positively predict vaccine acceptance given that vaccine  
uptake can be viewed as a form of other directed behavior that protects individuals beyond the  
self.

1  
2  
3 Second, we examine the association between compliance during the COVID-19 pandemic and  
4 vaccine acceptance. Protective behavior thus might be viewed as a collective good, implying  
5 that compliance with health advice might reflect the willingness to protect others rather than  
6 being individually rational to protect oneself.[33] Here, we specifically investigate support for  
7 non-pharmaceutical interventions, i.e., government restrictions to stop infection spread as a  
8 direct measure of the acceptance of collective responsibility.  
9

10  
11  
12  
13  
14 Third, interpersonal trust may be a key predictor of the willingness to contribute to collective  
15 action during the COVID-19 pandemic.[33] Vaccinations is a form of collective action, where  
16 herd immunity is produced via the collective participation in vaccination programs,[34] and  
17 people may be more likely to participate if they trust others to do the same.  
18  
19  
20

21  
22 Table 1, in the measurement section, shows the specific operationalization of each of these  
23 predictors and summarizes how these predictors are related to the 5C model. As is evident, we  
24 do not include measures that reflect the *calculation* component of the 5C model. From a  
25 communication perspective, however, this component is less important as it refers not to the  
26 content of the individual's considerations but to more stable individual differences in decision-  
27 making style (i.e., extensive cost-benefit analyses of pros and cons of vaccination and  
28 infection).[9]  
29  
30  
31  
32  
33  
34  
35  
36  
37

## 38 **Methods**

39  
40  
41 **Patient and public involvement.** Patients and/or the public were not involved in the design,  
42 or conduct, or reporting, or dissemination plans of this research.  
43  
44

45  
46 **Data.** We fielded quota-sampled surveys in eight countries from September 13, 2020 until  
47 February 16, 2021: Denmark, Sweden, the United Kingdom, the United States of America,  
48 Italy, France, Germany and Hungary (please see Table A1 in the Online Appendix (OA) for an  
49 overview of the data collection). These countries were chosen to represent a diversity of  
50 national responses to the COVID-19 pandemic as well as a diversity in the severity of the local  
51 epidemic. The period consists of eight data rounds in Denmark and seven data rounds in the  
52 remaining countries with approximately 500 respondents per data round. In each of the eight  
53 countries, the survey company Epinion sampled adult respondents using online panels. Among  
54 the panelists invited to take our survey, the response rate across the countries in our sample  
55  
56  
57  
58  
59  
60

was between 18 % (Hungary) and 64 % (the United States). The survey was conducted in accordance with the guidelines of the Danish National Committee of Health Research Ethics for survey research that do not involve human biological material. Survey respondents were quota sampled to match the population margins on age, gender, and geographic location for each of the eight countries. We address imbalances by post-stratifying our sample data to match the demographic margins from the population. All statistical analyses presented in the manuscript employ these post-stratification weights.

### Measures

All measures are self-reported from participant questionnaires. The key measures are vaccine acceptance, trust in relevant authorities and groups, disease-specific risk-perceptions, disease-specific attitudes, and propensities to engage in protective behavior. Table 1 provides an overview of question wordings and scales for these measures.

**Table 1:** Main measures in the study

|                           | Questions                                                                                                                                                                                                                     | Values                                                                                                                      |
|---------------------------|-------------------------------------------------------------------------------------------------------------------------------------------------------------------------------------------------------------------------------|-----------------------------------------------------------------------------------------------------------------------------|
| <b>Vaccine acceptance</b> | If the health authorities advise people like me to get an approved vaccine against the coronavirus, I will follow their advice.                                                                                               | 1. Completely disagree<br>2. Somewhat disagree<br>3. Neither agree nor disagree<br>4. Somewhat agree<br>5. Completely agree |
| <b>Confidence</b>         | <i>Trust in health authorities and scientists</i><br><br>How much trust do you have in the following institutions regarding the coronavirus crisis?<br><br>1) The national health authorities<br><br>2) Scientists            | 1. Not at all<br>2. To a lesser degree<br>3. To a certain degree<br>4. To a high degree                                     |
|                           | <i>Trust in the government</i><br><br>Give your assessment on a scale from 0 to 10, where 0 indicates that you have no confidence in the government at all, and 10 indicates that you have full confidence in the government. | 0. No confidence at all<br>1.<br>2.<br>3.<br>4.<br>5.<br>6.                                                                 |

|                    |                                                                                                                                                                                                                                                                                                                                                                                                                                                                                                                                |                                                                                                                                                    |
|--------------------|--------------------------------------------------------------------------------------------------------------------------------------------------------------------------------------------------------------------------------------------------------------------------------------------------------------------------------------------------------------------------------------------------------------------------------------------------------------------------------------------------------------------------------|----------------------------------------------------------------------------------------------------------------------------------------------------|
|                    |                                                                                                                                                                                                                                                                                                                                                                                                                                                                                                                                | 7.<br>8.<br>9.<br>10. Full confidence                                                                                                              |
|                    | <p><i>Attitudes</i></p> <p>To what extent do you agree with the following statements?</p> <p>(1) I'm concerned about my democratic rights in the current circumstances</p> <p>(2) I support the public protests against the government's policies during the COVID-19 pandemic</p> <p>(3) I believe the government is hiding important information from the public about the coronavirus and its cures</p> <p>(4) I have heard or read information about the coronavirus and its cures, which I believe was probably false</p> | <p>1. Completely disagree</p> <p>2. Somewhat disagree</p> <p>3. Neither agree nor disagree</p> <p>4. Somewhat agree</p> <p>5. Completely agree</p> |
|                    | <p><i>Vote choice</i></p> <p>What party/who did you vote for in the last general election/presidential election? [date for last election]</p>                                                                                                                                                                                                                                                                                                                                                                                  | [country-specific party/candidate categories]                                                                                                      |
|                    | <p><i>Ideology</i></p> <p>In political matters, people talk of 'the left' and 'the right'. How would you place your views on this scale, generally speaking?</p>                                                                                                                                                                                                                                                                                                                                                               | <p>1. The left</p> <p>2.</p> <p>3.</p> <p>4.</p> <p>5.</p> <p>6.</p> <p>7.</p> <p>8.</p> <p>9.</p> <p>10. The right</p>                            |
| <b>Constraints</b> | <p><i>Fatigue</i></p> <p>To what extent do you agree with the following statements?</p> <p>I do not think I can keep up with the restrictions against the coronavirus for much longer.</p>                                                                                                                                                                                                                                                                                                                                     | <p>1. Completely disagree</p> <p>2. Somewhat disagree</p> <p>3. Neither agree nor disagree</p> <p>4. Somewhat agree</p> <p>5. Completely agree</p> |
|                    | <p><i>Behavior change</i></p> <p>To what degree do you feel that the current situation with the coronavirus has made you change your behavior to avoid spreading infection?</p>                                                                                                                                                                                                                                                                                                                                                | <p>1. Not at all</p> <p>2. To a lesser degree</p> <p>3. To a certain degree</p> <p>4. To a high degree</p>                                         |
|                    | <p><i>Knowledge</i></p>                                                                                                                                                                                                                                                                                                                                                                                                                                                                                                        | <p>1. Not at all</p> <p>2. To a lesser degree</p> <p>3. To a certain degree</p> <p>4. To a high degree</p>                                         |

|                                  |                                                                                                                                                                                                                                                                                                                                                                                                                                                                                                                                                                                                                                             |                                                                                         |
|----------------------------------|---------------------------------------------------------------------------------------------------------------------------------------------------------------------------------------------------------------------------------------------------------------------------------------------------------------------------------------------------------------------------------------------------------------------------------------------------------------------------------------------------------------------------------------------------------------------------------------------------------------------------------------------|-----------------------------------------------------------------------------------------|
|                                  | To what degree do you feel that you know enough about what you as a citizen should do in relation to the coronavirus?                                                                                                                                                                                                                                                                                                                                                                                                                                                                                                                       |                                                                                         |
| <b>Complacency</b>               | <i>Sex</i><br>Are you?                                                                                                                                                                                                                                                                                                                                                                                                                                                                                                                                                                                                                      | 1. Male<br>2. Female                                                                    |
|                                  | <i>Age</i><br>What is your age?                                                                                                                                                                                                                                                                                                                                                                                                                                                                                                                                                                                                             | [open textbox]                                                                          |
|                                  | <i>Education</i><br>What is your highest level of completed education?                                                                                                                                                                                                                                                                                                                                                                                                                                                                                                                                                                      | [country-specific education categories]                                                 |
|                                  | <i>Personal risk-perceptions</i><br>To what degree are you concerned about the consequences of the corona-virus for you and your family?                                                                                                                                                                                                                                                                                                                                                                                                                                                                                                    | 1. Not at all<br>2. To a lesser degree<br>3. To a certain degree<br>4. To a high degree |
| <b>Collective responsibility</b> | <i>Prosocial concerns</i><br>To what degree are you concerned about the consequences of the corona-virus...<br><br>(1) ... for hospitals' ability to help the sick?<br><br>(2) ... for society's ability to help the disadvantaged?<br><br>(3) ... on social unrest and crime?<br><br>(4) ... on the country's economy??"                                                                                                                                                                                                                                                                                                                   | 1. Not at all<br>2. To a lesser degree<br>3. To a certain degree<br>4. To a high degree |
|                                  | <i>Support for restrictions</i><br><br>As you may know, many countries have implemented various measures to stop the spread of the COVID-19 epidemic. We are interested in whether you support or oppose the following measures in your country:<br><br>(1) Closing of schools and universities<br><br>(2) Closing (or work from home) for all-but-essential workplaces (e.g. grocery shops, doctors)<br><br>(3) Cancelling public events<br><br>(4) Cancelling private gatherings with over 100 people<br><br>(5) Closing public transportation<br><br>(6) Ordering people to shelter-in-place (not leaving house with minimal exceptions) | 1. Oppose<br>2. Support                                                                 |



|  |                                                                                                                                                                                                     |                                                                                                                                                                        |
|--|-----------------------------------------------------------------------------------------------------------------------------------------------------------------------------------------------------|------------------------------------------------------------------------------------------------------------------------------------------------------------------------|
|  | <p>(7) Restricting internal movement between cities/regions</p> <p>(8) Ordering people to wear face masks in public places</p> <p>(9) Banning arrivals for foreign travelers from some regions.</p> |                                                                                                                                                                        |
|  | <p><i>Interpersonal trust</i></p> <p>Do you think that most people by and large are to be trusted, or that you cannot be too careful when it comes to other people?</p>                             | <p>0. You cannot be too careful</p> <p>1.</p> <p>2.</p> <p>3.</p> <p>4.</p> <p>5.</p> <p>6.</p> <p>7.</p> <p>8.</p> <p>9.</p> <p>10. Most people are to be trusted</p> |

Notes: Mean and standard deviation of all measures is available in table A2 in the OA.

### *Vaccine acceptance*

Our outcome, vaccine acceptance, is framed as an approved vaccine that is recommended by the national health authorities. This choice reflects that (1) we focus on COVID-19 vaccines specifically, (2) in the context of a global health crisis, where (3) health authorities are emergency approving and very actively encouraging people to take up new vaccines. Some of these important factors are overlooked by previous validated vaccine acceptance measures developed pre-pandemic for measuring attitudes towards vaccines in general. Framing the question in the context of the national health authorities may, however, yield different results than if a standardised and validated measure of vaccine acceptance was used. Furthermore, this choice make it difficult to compare our results with other studies of vaccine acceptance.[9] Although Betsch et al. (2018) recommend to use a general scale, they also acknowledge that this might not be useful when the focus of a study is on a specific vaccine.[9]

Our outcome, vaccine acceptance, is a continuous variable rescaled to range from 0-1, with higher values indicating higher levels of acceptance of a future COVID-19 vaccine.

### *Predictors of vaccine acceptance*

All measures of trust, concern and disease-specific attitudes are treated as continuous variables and rescaled from 0-1, with higher values indicating higher levels of trust, concern and agreement with the disease-specific statements. For our compliance measures, behavior change and knowledge are treated as continuous variables and rescaled to range from 0-1, with higher values indicating higher levels of behavior change and knowledge. Furthermore, we create an index of support for restrictions by adding together the nine measures of support for restrictions. The index is scaled from 0-1, with higher values indicating higher levels of support for restrictions. “Do not know” answers are classified as missing and are not included in the analysis. Sex is an indicator variable (0 for males; 1 for females). Age is a continuous variable rescaled from 0-1 with 0 being the minimum age in the sample (18 years) and 1 being the maximum age (99 years). Education is an indicator variable based on the internationally comparable ISCED-scale (0 for non-tertiary education; 1 for tertiary education). Vote choice is an indicator variable (0 for opposition; 1 for government) (see table A3 in the OA for the coding of this variable). Finally, political ideology is a continuous variable rescaled to range from 0 to 1, with 1 indicating the ideological standpoint to the utmost right.

To ease the interpretation of the results, both the outcome and all predictors are scaled from 0-1 in the analyses below. Table A2 in the appendix reports the descriptive statistics for all the above correlates in our overall sample. Moreover, Figure A1 in the appendix shows an overview of all bivariate correlations.

### *Statistical analyses*

Since our dependent variable, vaccine acceptance, is continuous, we use OLS regression models to investigate the individual-level predictors of vaccine acceptance. In the results section we present two models: (I) a model with all the bivariate correlations of vaccine acceptance, (II) a full model that includes all predictors described above. Model II includes country dummies to control away country specific effects. Thus, our aim is to identify individual-level predictors of acceptance of a COVID-19 vaccine. To account for the fact that individuals are nested within countries, we cluster the standard errors at the country level.

In the OA we conduct a range of sensitivity analyses that probe the robustness of our benchmark results. First, we replicate the main analyses while treating the 4-point scale

1  
2  
3 measures of trust, concern, behavior change and knowledge as categorical variables instead of  
4 continuous (see Figure A4-A7 in the OA). Second, we similarly replicate the analyses while  
5 using a dichotomous - rather than the continuous - coding of the outcome<sup>1</sup> (see Figure A8 in  
6 the OA). Third, the present results reflect the analysis period between September 13, 2020 and  
7 February 16, 2021. Thus, we include data both pre- and post-approval of the COVID-19  
8 vaccines. In the OA, we compare the results before and after COVID-19 vaccines were  
9 approved (see Figure A9 in the OA). Fourth, in some contexts - most notably the countries with  
10 federal states (the US and Germany) in our sample - much of the COVID-19 response is done  
11 on a regional level. To account for state-specific heterogeneity, we analyze the individual-level  
12 predictors separately in Germany and the US, while controlling for state rather than country  
13 level dummies (see Figure A10-A12 in the OA). The results are essentially similar to those  
14 presented in the main text.  
15  
16  
17  
18  
19  
20  
21  
22  
23  
24  
25  
26  
27

## 28 Results

29 Figure 1 shows the development in vaccine acceptance, by country. For the descriptive analyses  
30 below, we refer to the percentage who accept the vaccine (i.e. share of respondents who  
31 answered “Somewhat agree” or “Completely agree” to whether they will follow the advice of  
32 the health authorities and get an approved vaccine). This percentage refers to the level of  
33 vaccine acceptance for the full analysis period, i.e. September 2020 - February 2021.  
34  
35  
36  
37  
38  
39  
40  
41  
42  
43  
44  
45

[Figure 1 about here]

46 Across the eight countries, we observe large differences in the level of vaccine acceptance.  
47 Specifically, we observe the highest level of vaccine acceptance in Denmark (82 %).  
48 Furthermore, we observe a high level of vaccine acceptance in the United Kingdom (76 %).  
49 However, we observe only moderate levels of vaccine acceptance in Sweden (67 %), Germany  
50 (66 %), Italy (66 %), and the United States (61 %). The lowest levels of vaccine acceptance is  
51 observed in France (55 %) and Hungary (52 %). However, it is worth noticing that in most of  
52  
53  
54  
55  
56  
57  
58

---

59 <sup>1</sup> For the dichotomous outcome measure, respondents who answered “Somewhat agree” or “Completely agree”  
60 are coded as 1, indicating vaccine acceptance.

1  
2  
3 the countries, we observe increasing levels of vaccine acceptance over the course of the  
4 pandemic as COVID-19 vaccines are being approved and rolled out.  
5  
6

7  
8 The results indicate that vaccine skepticism is present in most of the countries in our sample.  
9 These results underscore two important points. First, the presence of vaccine skepticism  
10 demonstrates the importance of understanding the individual-level variation of vaccine  
11 acceptance in order to understand the targets of health communication. Second, the large  
12 variation across countries emphasizes the need of a more thorough understanding of the  
13 importance of national context. In the Discussion section, we therefore move beyond the  
14 individual-level focus to also exploring macro-level correlations of vaccine acceptance.  
15  
16  
17  
18  
19

20  
21 On this basis, we turn towards understanding the individual-level predictors of acceptance of a  
22 COVID-19 vaccine. Figure 2 presents the results of the analyses (see Table A4 in the OA). In  
23 the discussions of results below, we specifically focus on the estimated correlations from model  
24 II in table A4 (the full model). The size of the estimated coefficients reported below reflects  
25 the difference in vaccine acceptance when we compare individuals at the minimum and  
26 maximum values, respectively, for each of the correlates.  
27  
28  
29  
30  
31  
32  
33  
34

35 [Figure 2 about here]  
36  
37  
38

39 Examining the *confidence* predictors, we observe that trust in the health authorities and trust in  
40 scientists are the strongest predictors of vaccine acceptance. Respondents who have the highest  
41 level of trust in the national health authorities have 17 (95% CI 14-20) percentage points higher  
42 acceptance of a COVID-19 vaccine compared to those with the least trust. The same pattern is  
43 observed for trust in scientists. Respondents with the highest level of trust have 21 (95% CI  
44 16-26) percentage points higher acceptance of an approved COVID-19 vaccine compared to  
45 those with the lowest trust level. Furthermore, trust in the government is also significantly  
46 positively predicting vaccine acceptance. Respondents high in government trust have 5 (95%  
47 CI 0-10) percentage points higher acceptance of an approved COVID-19 vaccine compared to  
48 those with the lowest level of trust. Focusing on the attitudinal aspect of *confidence* predictors,  
49 we observe that conspiracy beliefs significantly negatively predict vaccine acceptance, while  
50 awareness of misinformation significantly positively predicts vaccine acceptance. Specifically,  
51 respondents who score highest in thinking that the government is hiding information about the  
52  
53  
54  
55  
56  
57  
58  
59  
60

1  
2  
3 coronavirus and its cures (conspiracy beliefs), have 9 (95% CI 5-12) percentage points higher  
4 acceptance of an approved COVID-19 vaccine compared with those who do not subscribe to  
5 conspiracies. Respondents who think that they have been exposed to misinformation have 4  
6 (95% CI 1-7) percentage points higher acceptance of an approved COVID-19 vaccine. Both  
7 concern about democratic rights and support for protests are negatively, but not significantly,  
8 associated with vaccine acceptance. Finally, neither political ideology nor vote choice are  
9 significantly associated with vaccine acceptance.

10  
11  
12 Moving to the *constraints* predictors, we observe that behavior change is a significant positive  
13 predictor of vaccine acceptance. Specifically, respondents who have changed their behavior  
14 the most to avoid spreading infection have 11 (95% CI 7-14) percentage points higher  
15 acceptance of an approved COVID-19 vaccine compared to respondents who have changed  
16 their behavior the least. Neither fatigue nor knowledge are significant predictors of vaccine  
17 acceptance.

18  
19  
20 Focusing on the *complacency* predictors, we observe that being male, older, and having tertiary  
21 education is associated with higher vaccine acceptance. Specifically, females have 5 (95% CI  
22 3-7) percentage points lower acceptance of an approved vaccine compared to males. Age  
23 positively predicts vaccine acceptance: When comparing respondents at the minimum and  
24 maximum level of age in the sample (18-99 years), the difference is 19 (95% CI 12-26)  
25 percentage points. Furthermore, respondents with tertiary education have 2 (95% CI 1-3)  
26 percentage points higher acceptance of an approved COVID-19 vaccine compared to  
27 respondents with non-tertiary education. Finally, personal risk-perception is also a positive  
28 predictor of vaccine acceptance. The respondents who are the most concerned about the  
29 consequences of the corona crisis for themselves and their families have 9 (95% CI 3-14)  
30 percentage points higher acceptance of an approved COVID-19 vaccine compared to the least  
31 concerned.

32  
33  
34 Finally, looking at the *collective responsibility* predictors, the strongest predictors of vaccine  
35 acceptance is support for restrictions. Specifically, respondents who are most supportive of  
36 restrictions have 13 (95% CI 9-17) percentage points higher acceptance of an approved vaccine  
37 compared to respondents who are the least supportive of restrictions. Furthermore,  
38 interpersonal trust positively predicts vaccine acceptance. Respondents with the highest level  
39 of interpersonal trust have 6 (95% CI 3-9) percentage points higher acceptance of an approved  
40 COVID-19 vaccine compared to respondents with the lowest interpersonal trust level. Concern  
41  
42  
43  
44  
45  
46  
47  
48  
49  
50  
51  
52  
53  
54  
55  
56  
57  
58  
59  
60

1  
2  
3 for the capacity of hospitals is also a positive predictor of vaccine acceptance. Comparing those  
4 who are the most concerned for the capacity of hospitals to those who are the least concerned  
5 shows a 5 (95% CI 2-8) percentage points increase in vaccine acceptance. Additionally,  
6 concern for social unrest and crime negatively predicts vaccine acceptance. Comparing those  
7 who are the most concerned for social unrest and crime to those who are the least concerned  
8 shows a 3 (95% CI 1-5) percentage points decrease in vaccine acceptance. Finally, neither  
9 concern for the society's ability to help the disadvantaged nor concern for the country's  
10 economy are significantly associated with vaccine acceptance.  
11  
12  
13  
14  
15  
16  
17

18 The relationship between the predictors and vaccine acceptance is essentially the same across  
19 the bivariate and the full model. However, ideology changes from being significant and  
20 negative in the bivariate model to insignificant and positive in the full model. Furthermore,  
21 concern for the society's ability to help the disadvantaged changes from being significant and  
22 positive in the bivariate model to insignificant and negative in the full model. Overall, the  
23 empirical patterns are relatively stable across countries, but we do observe some notable cross-  
24 country differences with respect to specific predictors (see Figure A2 in the OA). In Denmark,  
25 neither trust in scientists nor personal risk-perceptions are significant predictors of vaccine  
26 acceptance. Focusing on heterogeneity across individual-level demographic subgroups, we see  
27 that results are essentially homogenous across sex, age and educational level (see Figures A13-  
28 A15 in the OA). Even though the levels of vaccine acceptance has changed over the course of  
29 the pandemic, the results of the individual-level predictors of vaccine acceptance are essentially  
30 the same when results pre- and post-approval of COVID-19 vaccines are compared (see Figure  
31 A9 in the OA).  
32  
33  
34  
35  
36  
37  
38  
39  
40  
41  
42  
43  
44  
45

## 46 **Discussion**

47  
48 In this paper, we investigated (1) the level of vaccine acceptance of an approved COVID-19  
49 vaccine, and (2) individual-level predictors of vaccine acceptance. While levels of vaccine  
50 acceptance generally increased when COVID-19 vaccines were approved during the winter of  
51 2020-2021, the results also demonstrate that for many of the countries in our sample, people  
52 are only moderately willing to receive a vaccine. This highlights the need for understanding  
53 the individual-level variation underlying vaccine skepticism and identifying potential targets  
54 for guiding health communication to increase vaccine acceptance.  
55  
56  
57  
58  
59  
60

1  
2  
3 The analyses of individual-level predictors demonstrate that the key drivers of COVID-19  
4 vaccine acceptance are (1) trust in the national health authorities and scientists, and (2) personal  
5 health concerns. These results are consistent with findings of similar studies that emphasize  
6 that those who have more trust in experts and scientists are more willing to vaccinate.[13, 35]  
7 Likewise, several studies have also found personal risk-perception to be an important predictor  
8 of acceptance of a COVID-19 vaccine.[20, 27, 29, 36] Furthermore, Neumann-Böhme & Sabat  
9 (2020) find that the most frequently used reason for vaccination is to protect the respondents  
10 own and family members health.[37] Motta et al. (2020) also find that messages emphasizing  
11 the personal risks at failing to vaccinate are effective in convincing people to plan to get  
12 vaccinated.[38] Thus, in the framework of the 5C Model from Betsch et al. (2020), skepticism  
13 towards a COVID-19 vaccine primarily results from *complacency* or a lack of *confidence*.<sup>[9]</sup>  
14 Using these insights is essential to guide health communication in a way that can potentially  
15 increase vaccine acceptance.[39] Specifically, our findings suggest that efforts should be  
16 focused on motivating the complacent, i.e. those who lacks concerns about the personal  
17 consequences of the pandemic. This can be done through informational interventions to explain  
18 disease risks and stress the social benefits of vaccination.[39] When it comes to individuals  
19 with a lack of confidence, they usually possess a considerable amount of incorrect knowledge  
20 that distorts risk perceptions and undermines the general trust in vaccination.[39] Consistent  
21 with this, the present findings also highlight conspiracy beliefs as a key predictor of vaccine  
22 hesitancy. Following Betsch et al. (2015), this implies that interventions aiming at debunking  
23 myths is the key to increase vaccine acceptance among those who lack confidence.[39]  
24 However, strategies aiming at those who lack confidence are scarce, thus, focusing on  
25 motivating the complacent may be more effective.[39] Altogether, these results suggest that  
26 the most important communication targets are the consequences of infections for the self and  
27 close others and debunking of myths.

28  
29  
30  
31  
32  
33  
34  
35  
36  
37  
38  
39  
40  
41  
42  
43  
44  
45  
46  
47 While trust in the national health authorities and scientists are the most prominent factors  
48 together with personal risk-perceptions when everything is assessed individually, the data also  
49 shows that vaccine skepticism during the pandemic is interwoven into a larger web of attitudes  
50 and behaviors related to anti-systemic sentiments. Hence, in addition to trust in health  
51 authorities, a lack of vaccine acceptance was also related to endorsement of conspiracy beliefs,  
52 support for other non-pharmaceutical interventions, and a lack of compliance with advice about  
53 changing behavior to avoid spreading infections.  
54  
55  
56  
57  
58  
59  
60

1  
2  
3 As a final explorative analysis, we therefore assess whether the highlighted factors also help  
4 explain the cross-national variation in vaccine acceptance. To this end, we examine the  
5 correlations between vaccine acceptance at the national level and each of the different  
6 independent measures aggregated for each country. All of these correlations are available in  
7 Figure A16 in the OA. In Figure 3, we present the correlations for key variables highlighted  
8 above: Trust in health authorities, personal risk-perceptions, conspiracy beliefs and behavior  
9 change. While the analysis is highly limited by the fact that it only includes eight national cases,  
10 it is nonetheless strikingly informative. While differences in personal risk-perceptions are not  
11 strongly related to cross-national differences, country averages in the anti-systemic measures,  
12 especially (lack of) trust in health authorities, are exceptionally closely related to country  
13 averages in vaccine acceptance. Trust in health authorities does not just explain differences in  
14 vaccine acceptance between individuals but also between countries.

15  
16  
17  
18  
19  
20  
21  
22  
23  
24  
25 [Figure 3 about here]  
26  
27  
28  
29

30 In sum, these analyses point to the significant challenges involved in convincing vaccine  
31 skeptics. The web of anti-systemic attitudes and distrust that vaccine skepticism is interwoven  
32 in makes it difficult to craft efficient health communication, as the effectiveness of  
33 communication is fundamentally contingent on the preceding existence of trust in its source.  
34 This challenge might be further deepened during the COVID-19 pandemic as research suggests  
35 that the stress of the pandemic and the restrictions itself fuels anti-systemic beliefs.[40] The  
36 results thus, first, emphasize the general importance of building trust prior to the onset of crises  
37 and of investing significant resources into maintaining trust as a crisis unfolds.[41] Second, for  
38 most short-term oriented communication purposes, the results suggest that the best  
39 communication targets are the consequences of infections for the self and close others and  
40 debunking of myths.

41  
42  
43  
44  
45  
46  
47  
48  
49  
50 The results should however be considered in the light of the following limitations. First, the  
51 results are based on observational data which limits causal traction. Second, we investigate  
52 self-reported vaccine acceptance, and thus, not actual vaccination behavior. Therefore, we  
53 cannot be sure that acceptance of the vaccine translates into actual vaccination rates, since self-  
54 reported vaccine acceptance can be subject to social desirability bias.



## Conclusion

The results demonstrate that vaccine skepticism is present in most of the countries in our sample, even after vaccines have been approved. Consistent with similar studies, the analyses of the individual-level predictors show that the key individual drivers of acceptance of an approved COVID-19 vaccine are (1) trust in the national health authorities and scientists, and (2) personal health concerns. The results suggest that an important communication target is the consequences of infections for the self and close others. Furthermore, these results emphasize that anything that erodes trust in health authorities and scientists are problematic for vaccination efforts, and thus, underscore the key importance of health and political authorities to strive to uphold trust to the maximum extent during the pandemic. This is not just crucial for managing the pandemic here and now but also as a preparation for the next health emergency.

peer review only

## References

- [1] WHO (2020). WHO Director-General's opening remarks at the media briefing on COVID-19 - 21 August 2020. <https://www.who.int/dg/speeches/detail/who-director-general-s-opening-remarks-at-the-media-briefing-on-covid-19---21-august-2020>
- [2] Britton, T., Ball, F., & Trapman, P. (2020). A mathematical model reveals the influence of population heterogeneity on herd immunity to SARS-CoV-2. *Science*, 369, 846–849
- [3] Sanche, S., Lin, Y. T., Xu, C., Romero-Severson, E., Hengartner, N., & Ke, R. (2020). High contagiousness and rapid spread of severe acute respiratory syndrome coronavirus 2. *Emerging Infectious Diseases*, 26
- [4] Dubé, E., Laberge, C., Guay, M., Bramadat, P., Roy, R., & Bettinger, J. A. (2013). Vaccine hesitancy: an overview. *Human vaccines & immunotherapeutics*, 9(8), 1763-1773.
- [5] Larson, H., de Figueiredo, A., Karafillakis, E., & Rawal, M. (2018). State of vaccine confidence in the EU 2018. *Luxembourg: Publications Office of the European Union*, 10, 241099.
- [6] The DELVE Initiative (2020), *SARS-CoV-2 Vaccine Development & Implementation; Scenarios, Options, Key Decisions*. DELVE Report No. 6. Published 01 October 2020. Available from <http://rs-delve.github.io/reports/2020/10/01/covid19-vaccination-report.html>.
- [7] Schuster, M., & Duclos, P. (2015). WHO recommendations regarding vaccine hesitancy. *Vaccine*, 33(34), 4155-218.
- [8] Lazarus, J. V., Ratzan, S. C., Palayew, A., Gostin, L. O., Larson, H. J., Rabin, K., ... & El-Mohandes, A. (2020). A global survey of potential acceptance of a COVID-19 vaccine. *Nature medicine*, 1-4.
- [9] Betsch, C., Schmid, P., Heinemeier, D., Korn, L., Holtmann, C., & Böhm, R. (2018). Beyond confidence: Development of a measure assessing the 5C psychological antecedents of vaccination. *PloS one*, 13(12), e0208601.
- [10] MacDonald, N. E. (2015). Vaccine hesitancy: Definition, scope and determinants. *Vaccine*, 33(34), 4161-4164.

- 1  
2  
3 [11] Guay, M., Gosselin, V., Petit, G., Baron, G., & Gagneur, A. (2019). Determinants of  
4 vaccine hesitancy in Quebec: a large population-based survey. *Human Vaccines &*  
5 *Immunotherapeutics*, *15*(11), 2527-2533.  
6  
7  
8  
9 [12] Nan, X., Zhao, X., & Briones, R. (2014). Parental cancer beliefs and trust in health  
10 information from medical authorities as predictors of HPV vaccine acceptability. *Journal of*  
11 *Health Communication*, *19*(1), 100-114.  
12  
13  
14 [13] Roozenbeek, J., Schneider, C. R., Dryhurst, S., Kerr, J., Freeman, A. L., Recchia, G., &  
15 van der Linden, S. (2020a). Susceptibility to misinformation about COVID-19 around the  
16 world. *Royal Society Open Science*, *7*(10), 201199.  
17  
18  
19 [14] Baumgaertner, B., Carlisle, J. E., & Justwan, F. (2018). The influence of political ideology  
20 and trust on willingness to vaccinate. *PloS one*, *13*(1), e0191728.  
21  
22  
23 [15] Bolsen, T., Druckman, J. N., & Cook, F. L. (2014). The influence of partisan motivated  
24 reasoning on public opinion. *Political Behavior*, *36*(2), 235-262.  
25  
26  
27 [16] Jolley, D., & Douglas, K. M. (2014). The effects of anti-vaccine conspiracy theories on  
28 vaccination intentions. *PloS one*, *9*(2), e89177.  
29  
30  
31 [17] Tomljenovic, H., Bubic, A., & Erceg, N. (2020). It just doesn't feel right—the relevance of  
32 emotions and intuition for parental vaccine conspiracy beliefs and vaccination uptake.  
33 *Psychology & Health*, *35*(5), 538-554.  
34  
35  
36 [18] Freeman, D., Waite, F., Rosebrock, L., Petit, A., Causier, C., East, A., ... & Bold, E.  
37 (2020). Coronavirus conspiracy beliefs, mistrust, **and** compliance with government guidelines  
38 in England. *Psychological Medicine*, 1-30.  
39  
40  
41 [19] Salali, G. D., & Uysal, M. S. (2020). COVID-19 vaccine hesitancy is associated with  
42 beliefs on the origin of the novel coronavirus in the UK and Turkey. *Psychological medicine*,  
43 1-3.  
44  
45  
46 [20] McManus, S., D'Ardenne, J., & Wessely, S. (2020). Covid conspiracies: misleading  
47 evidence can be more damaging than no evidence at all. *Psychological Medicine*, *21*, 1-2.  
48  
49  
50  
51  
52  
53  
54  
55  
56  
57  
58  
59  
60

- 1  
2  
3 [21] Roozenbeek, J., van der Linden, S., & Nygren, T. (2020b). Prebunking interventions based  
4 on “inoculation” theory can reduce susceptibility to misinformation across cultures. *Harvard*  
5 *Kennedy School Misinformation Review*, 1(2).  
6  
7  
8  
9 [22] Roozenbeek, J., & Van Der Linden, S. (2019). The fake news game: actively inoculating  
10 against the risk of misinformation. *Journal of Risk Research*, 22(5), 570-580.  
11  
12  
13 [23] Van Der Linden, S., Maibach, E., Cook, J., Leiserowitz, A., & Lewandowsky, S. (2017).  
14 Inoculating against misinformation. *Science*, 358(6367), 1141-1142.  
15  
16  
17 [24] World Health Organization. (2020). *Pandemic fatigue: reinvigorating the public to*  
18 *prevent COVID-19: policy framework for supporting pandemic prevention and management:*  
19 *revised version November 2020* (No. WHO/EURO: 2020-1573-41324-56242). World Health  
20 Organization. Regional Office for Europe.  
21  
22  
23 [25] Michie, S., West, R., & Harvey, N. (2020). The concept of “fatigue” in tackling covid-19.  
24 *bmj*, 371.  
25  
26 [26] Jørgensen, F. J., Bor, A., & Petersen, M. B. (2020). Compliance Without Fear: Predictors  
27 of Protective Behavior During the First Wave of the COVID-19 Pandemic. *PsyArXiv*. May, 19.  
28  
29 [27] Dror, A. A., Eisenbach, N., Taiber, S., Morozov, N. G., Mizrachi, M., Zigran, A., & Sela,  
30 E. (2020). Vaccine hesitancy: the next challenge in the fight against COVID-19. *European*  
31 *journal of epidemiology*, 35(8), 775-779.  
32  
33 [28] Wong, L. P., Alias, H., Wong, P. F., Lee, H. Y., & AbuBakar, S. (2020). The use of the  
34 health belief model to assess predictors of intent to receive the COVID-19 vaccine and  
35 willingness to pay. *Human vaccines & immunotherapeutics*, 1-11.  
36  
37 [29] Hacquin, A. S., Altay, S., de Araujo, E., Chevallier, C., & Mercier, H. (2020). Sharp rise  
38 in vaccine hesitancy in a large and representative sample of the French population: reasons for  
39 vaccine hesitancy.  
40  
41 [30] Wagner, A. L., Masters, N. B., Domek, G. J., Mathew, J. L., Sun, X., Asturias, E. J., ... &  
42 Boulton, M. L. (2019). Comparisons of vaccine hesitancy across five low-and middle-income  
43 countries. *Vaccines*, 7(4), 155.  
44  
45  
46  
47  
48  
49  
50  
51  
52  
53  
54  
55  
56  
57  
58  
59  
60

- 1  
2  
3 [31] Bertonecello, C., Ferro, A., Fonzo, M., Zanovello, S., Napoletano, G., Russo, F., ... &  
4 Cocchio, S. (2020). Socioeconomic Determinants in Vaccine Hesitancy and Vaccine Refusal  
5 in Italy. *Vaccines*, 8(2), 276.  
6  
7  
8  
9 [32] Fine, P., Eames, K., & Heymann, D. L. (2011). "Herd immunity": a rough guide. *Clinical*  
10 *infectious diseases*, 52(7), 911-916.  
11  
12  
13 [33] Johnson, T., Dawes, C., Fowler, J., & Smirnov, O. (2020). Slowing COVID-19  
14 transmission as a social dilemma: Lessons for government officials from interdisciplinary  
15 research on cooperation. *Journal of Behavioral Public Administration*, 3(1).  
16  
17  
18 [34] Siegal, G., Siegal, N., & Bonnie, R. J. (2009). An account of collective actions in public  
19 health. *American Journal of Public Health*, 99(9), 1583-1587.  
20  
21  
22 [35] Callaghan, T., Moghtaderi, A., Lueck, J. A., Hotez, P., Strych, U., Dor, A., ... & Motta,  
23 M. (2020). Correlates and disparities of intention to vaccinate against COVID-19. *Social*  
24 *science & medicine (1982)*.  
25  
26  
27 [36] Guidry, J. P., Laestadius, L. I., Vraga, E. K., Miller, C. A., Perrin, P. B., Burton, C. W., ...  
28 & Carlyle, K. E. (2021). Willingness to get the COVID-19 vaccine with and without emergency  
29 use authorization. *American journal of infection control*, 49(2), 137-142.  
30  
31  
32 [37] Neumann-Böhme, S., & Sabat, I. Now, we have it. Will we use it? New results from ECOS  
33 on the willingness to be vaccinated against COVID-19.  
34  
35  
36 [38] Motta, M., Sylvester, S., Callaghan, T., & Trujillo, K. L. (2020). *Encouraging COVID-19*  
37 *Vaccine Uptake through Effective Health Communication* (No. 4d25e). Center for Open  
38 Science.  
39  
40  
41 [39] Betsch, C., Böhm, R., & Chapman, G. B. (2015). Using behavioral insights to increase  
42 vaccination policy effectiveness. *Policy Insights from the Behavioral and Brain Sciences*, 2(1),  
43 61-73  
44  
45  
46 [40] Bartusevičius, H., Bor, A., Jørgensen, F. J., & Petersen, M. B. (2020). The psychological  
47 burden of the COVID-19 pandemic drives anti-systemic attitudes and political violence.  
48  
49  
50 [41] WHO (2017). *Vaccination and trust: How concerns arise and the role of communication*  
51 *in mitigating crises*. Report available at  
52  
53  
54  
55  
56  
57  
58  
59  
60

1  
2  
3 [https://www.euro.who.int/\\_data/assets/pdf\\_file/0004/329647/Vaccines-and-trust.PDF](https://www.euro.who.int/_data/assets/pdf_file/0004/329647/Vaccines-and-trust.PDF),  
4 accessed March 4, 2021.  
5  
6  
7  
8  
9  
10  
11  
12  
13  
14  
15  
16  
17  
18  
19  
20  
21  
22  
23  
24  
25  
26  
27  
28  
29  
30  
31  
32  
33  
34  
35  
36  
37  
38  
39  
40  
41  
42  
43  
44  
45  
46  
47  
48  
49  
50  
51  
52  
53  
54  
55  
56  
57  
58  
59  
60

For peer review only

## Figure captions and legends

### Figure 1: Development in vaccine acceptance for an approved COVID-19 vaccine

Note: N = 18,231. The figure illustrates the development in vaccine acceptance across countries. Vaccine acceptance is here defined as the proportion who answers “Somewhat agree” or “Completely agree” to the question: “If the health authorities advise people like me to get an approved vaccine against the coronavirus, I will follow their advice.”

### Figure 2: Individual-level correlations of vaccine acceptance

Note: N = 18,231. Black circles are the estimated correlations based on model I-II in Table A4 in the OA. Model II includes control for country dummies. Horizontal bars are the associated 95 % confidence interval.

### Figure 3: Macro-level correlations of vaccine acceptance

Note: The figure plots country averages for vaccine acceptance and country averages for four measures: Trust in health authorities, egotropic concern related to COVID-19, endorsement of COVID-19 conspiracy beliefs and the degree of changed behavior to avoid spreading infections during the COVID-19 pandemic. Reported correlations are pearson's r.

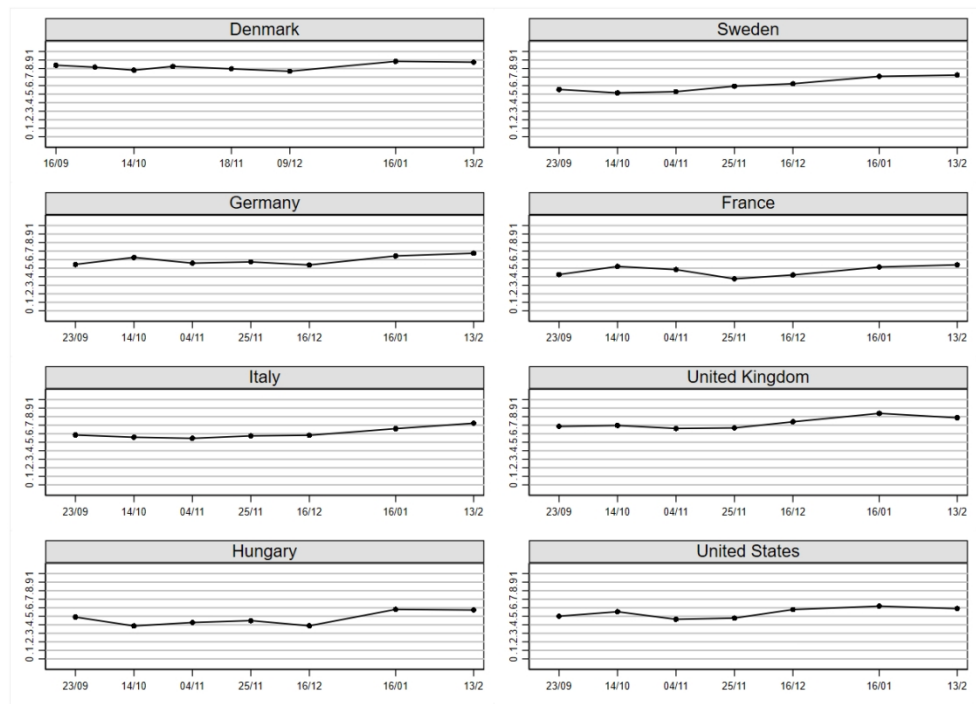

**Figure 1:** Development in vaccine acceptance for an approved COVID-19 vaccine / Note: N = 18,231. The figure illustrates the development in vaccine acceptance across countries. Vaccine acceptance is here defined as the proportion who answers "Somewhat agree" or "Completely agree" to the question: "If the health authorities advise people like me to get an approved vaccine against the coronavirus, I will follow their advice."

450x327mm (72 x 72 DPI)



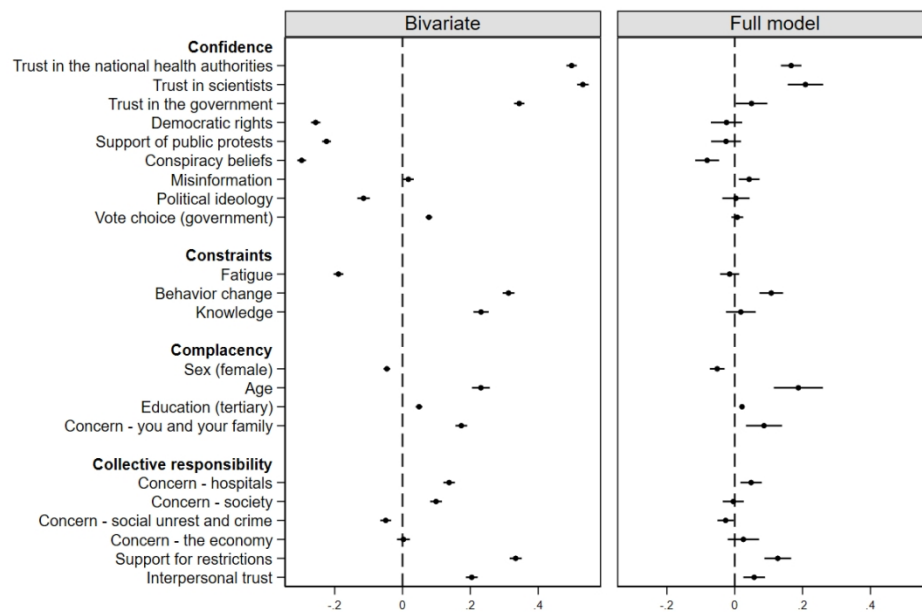

**Figure 2:** Individual-level correlations of vaccine acceptance / Note: N = 18,231. Black circles are the estimated correlations based on model I-II in Table A4 in the OA. Model II includes control for country dummies. Horizontal bars are the associated 95 % confidence interval.

451x300mm (72 x 72 DPI)

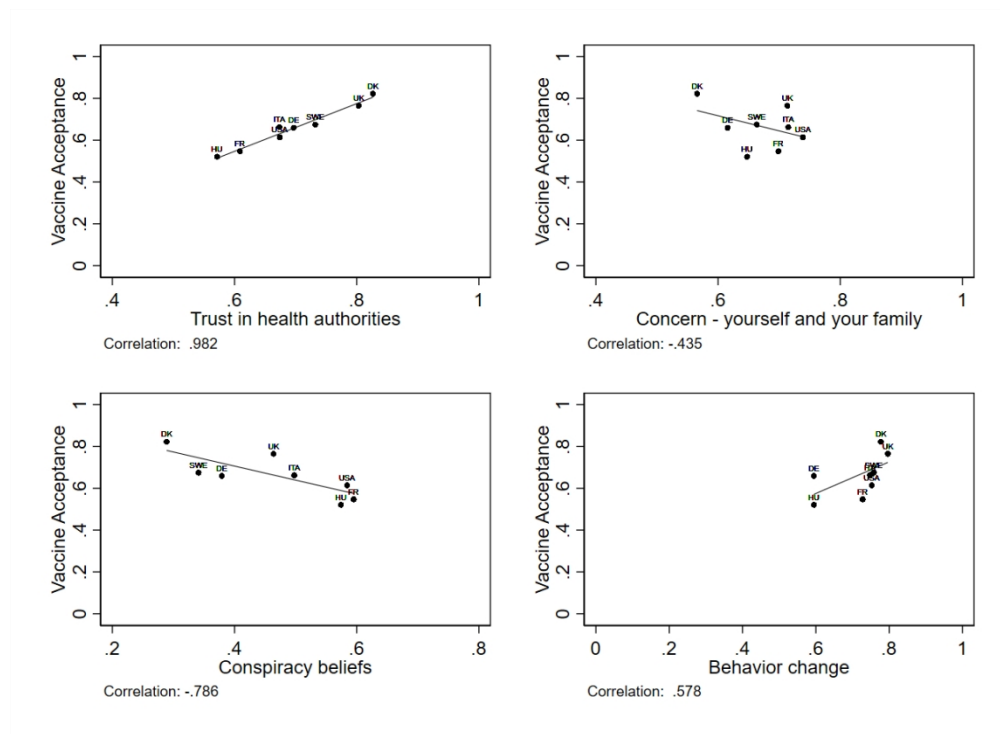

**Figure 3:** Macro-level correlations of vaccine acceptance / Note: The figure plots country averages for vaccine acceptance and country averages for four measures: Trust in health authorities, egotropic concern related to COVID-19, endorsement of COVID-19 conspiracy beliefs and the degree of changed behavior to avoid spreading infections during the COVID-19 pandemic. Reported correlations are pearson’s r.

450x327mm (72 x 72 DPI)

**Table A1:** Overview of data collection

| <b>Country</b> | <b>Dates</b>                           | <b>Obs.</b> |
|----------------|----------------------------------------|-------------|
| Denmark        | September 13, 2020 – February 16, 2021 | 2,765       |
| Sweden         | September 20, 2020 – February 16, 2021 | 2,149       |
| United Kingdom | September 20, 2020 – February 16, 2021 | 2,437       |
| United States  | September 20, 2020 – February 16, 2021 | 2,185       |
| Italy          | September 20, 2020 – February 16, 2021 | 2,411       |
| France         | September 20, 2020 – February 16, 2021 | 2,090       |
| Germany        | September 20, 2020 – February 16, 2021 | 2,380       |
| Hungary        | September 20, 2020 – February 16, 2021 | 1,814       |

**Table A2:** Descriptive statistics

|                                      | <b>Mean</b> | <b>SD</b> | <b>Min</b> | <b>Max</b> | <b>N</b> |
|--------------------------------------|-------------|-----------|------------|------------|----------|
| <b>Vaccine acceptance</b>            | 0.66        | 0.34      | 0          | 1          | 18,231   |
| <b>Confidence</b>                    |             |           |            |            |          |
| Trust in national health authorities | 0.70        | 0.29      | 0          | 1          | 18,231   |
| Trust in scientists                  | 0.76        | 0.26      | 0          | 1          | 18,231   |
| Trust in the government              | 0.54        | 0.31      | 0          | 1          | 18,231   |
| Concern about democratic rights      | 0.47        | 0.35      | 0          | 1          | 18,231   |
| Support for protests                 | 0.36        | 0.36      | 0          | 1          | 18,231   |
| Conspiracy beliefs                   | 0.46        | 0.36      | 0          | 1          | 18,231   |
| Misinformation                       | 0.60        | 0.31      | 0          | 1          | 18,231   |
| Political ideology                   | 0.50        | 0.26      | 0          | 1          | 18,231   |
| Vote choice (government)             | 0.47        | 0.50      | 0          | 1          | 18,231   |
| <b>Constraints</b>                   |             |           |            |            |          |
| Fatigue                              | 0.37        | 0.33      | 0          | 1          | 18,231   |
| Behavior change                      | 0.73        | 0.27      | 0          | 1          | 18,231   |
| Knowledge                            | 0.80        | 0.22      | 0          | 1          | 18,231   |
| <b>Complacency</b>                   |             |           |            |            |          |
| Sex (female)                         | 0.46        | 0.50      | 0          | 1          | 18,231   |
| Age                                  | 0.35        | 0.18      | 0          | 1          | 18,231   |
| Education (tertiary)                 | 0.50        | 0.50      | 0          | 1          | 18,231   |
| Concern - you and your family        | 0.67        | 0.28      | 0          | 1          | 18,231   |
| <b>Collective responsibility</b>     |             |           |            |            |          |
| Concern - hospitals                  | 0.71        | 0.29      | 0          | 1          | 18,231   |
| Concern - society                    | 0.69        | 0.28      | 0          | 1          | 18,231   |
| Concern - social unrest and crime    | 0.63        | 0.31      | 0          | 1          | 18,231   |
| Concern - the country's economy      | 0.78        | 0.26      | 0          | 1          | 18,231   |
| Support for restrictions             | 0.69        | 0.27      | 0          | 1          | 18,231   |
| Interpersonal trust                  | 0.50        | 0.28      | 0          | 1          | 18,231   |

**Table A3:** Coding of vote choice variable

| <b>Country</b> | <b>Government</b>       | <b>Opposition</b>      |
|----------------|-------------------------|------------------------|
| Denmark        | Socialdemokratiet       | Konservative           |
|                | Radikale                | Nye Borgerlige         |
|                | Socialistisk Folkeparti | Klaus Riskjær Pedersen |
|                | Enhedslisten            | Liberal Alliance       |
|                |                         | Kristendemokraterne    |
|                |                         | Dansk Folkeparti       |
|                |                         | Stram Kurs             |
| Sweden         |                         | Venstre                |
|                |                         | Alternativet           |
|                | Miljöpartiet            | Kristendemokraterna    |
|                | Socialdemokraterna      | Moderaterna            |
|                | Vänsterpartiet          | Sverigedemokraterna    |
| United Kingdom | Centerpartiet           |                        |
|                | Liberalerna             |                        |
|                | Conservative            | Labour                 |
|                |                         | SNP                    |
| United States  |                         | Liberal Democrats      |
|                | Republicans             | Democrats              |
| Italy          | Centre-Left             | Centre-Right           |
|                | Five Star Movement      | Free and Equal         |
| France         | Macron                  | Fillon                 |
|                |                         | Le Pen                 |
|                |                         | Dupont-Aignan          |
|                |                         | Hamon                  |
|                |                         | Melenchon              |
| Germany        | CDU/SDU                 | AfD                    |
|                | SPD                     | FDP                    |
|                |                         | Die Linke              |
|                |                         | Grüne                  |
| Hungary        | Fidesz-KDNP             | Jobbik                 |
|                |                         | MSZP-MM                |
|                |                         | LMP                    |
|                |                         | DK                     |
|                |                         | MM                     |

Figure A1: Bivariate correlations

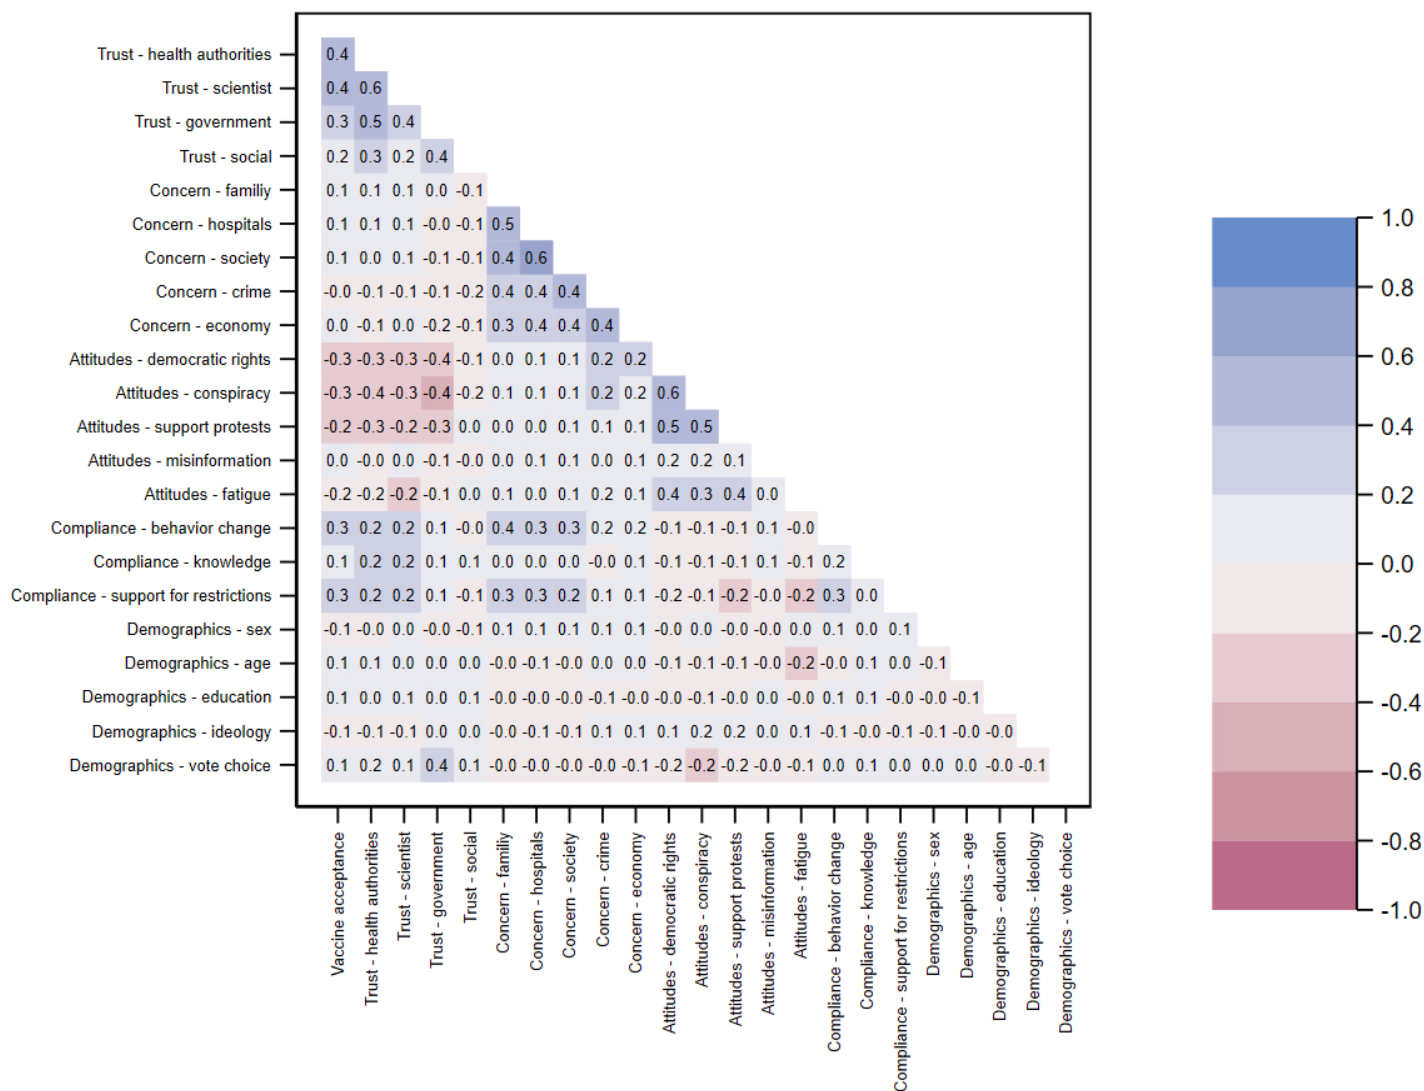

only

**Table A4:** Individual-level predictors of vaccine acceptance

|                                   | <b>Model I</b> |         | <b>Model VI</b> |         |
|-----------------------------------|----------------|---------|-----------------|---------|
|                                   | Bivariate      |         | Full model      |         |
| <b>Confidence</b>                 |                |         |                 |         |
| Trust in health authorities       | 0.498***       | (0.008) | 0.166***        | (0.013) |
| Trust in scientists               | 0.531***       | (0.009) | 0.208***        | (0.022) |
| Trust in the government           | 0.344***       | (0.008) | 0.050*          | (0.020) |
| Concern about democratic rights   | -0.256***      | (0.007) | -0.024          | (0.020) |
| Support for protests              | -0.224***      | (0.007) | -0.026          | (0.019) |
| Conspiracy beliefs                | -0.297***      | (0.007) | -0.081***       | (0.015) |
| Misinformation                    | 0.017*         | (0.008) | 0.043*          | (0.013) |
| Ideology                          | -0.115***      | (0.009) | 0.004           | (0.017) |
| Vote choice (government)          | 0.078***       | (0.005) | 0.008           | (0.007) |
| <b>Constraints</b>                |                |         |                 |         |
| Fatigue                           | -0.189***      | (0.007) | -0.015          | (0.012) |
| Behavior change                   | 0.312***       | (0.009) | 0.108***        | (0.015) |
| Knowledge                         | 0.232***       | (0.011) | 0.018           | (0.019) |
| <b>Complacency</b>                |                |         |                 |         |
| Sex (female)                      | -0.046***      | (0.005) | -0.052***       | (0.009) |
| Age                               | 0.231***       | (0.013) | 0.188***        | (0.031) |
| Education (tertiary)              | 0.049***       | (0.005) | 0.022***        | (0.002) |
| Concern - you and your family     | 0.173***       | (0.009) | 0.086**         | (0.023) |
| <b>Collective responsibility</b>  |                |         |                 |         |
| Concern - hospitals               | 0.137***       | (0.009) | 0.048**         | (0.013) |
| Concern - society                 | 0.099***       | (0.009) | -0.004          | (0.013) |
| Concern - social unrest and crime | -0.049***      | (0.008) | -0.027*         | (0.010) |
| Concern - the country's economy   | 0.003          | (0.010) | 0.026           | (0.020) |
| Support for restrictions          | 0.334***       | (0.009) | 0.127***        | (0.017) |
| Interpersonal trust               | 0.204***       | (0.009) | 0.057**         | (0.014) |
| Constant                          |                |         | -0.034          | (0.025) |
| Observations                      | 18,231         |         | 18,231          |         |
| $R^2$                             | NA             |         | 0.322           |         |

Notes. Entries are unstandardized OLS regression coefficients from models with all variables standardized on a scale from 0-1. Clustered robust standard errors on country level in parentheses. Model 1 displays effects from bivariate models and, hence, a combined  $R^2$  cannot be computed. Model II includes control for country dummies. \*  $p < 0.05$ , \*\*  $p < 0.01$ , \*\*\*  $p < 0.001$ .

**Figure A2:** Individual-level correlations of vaccine acceptance by country

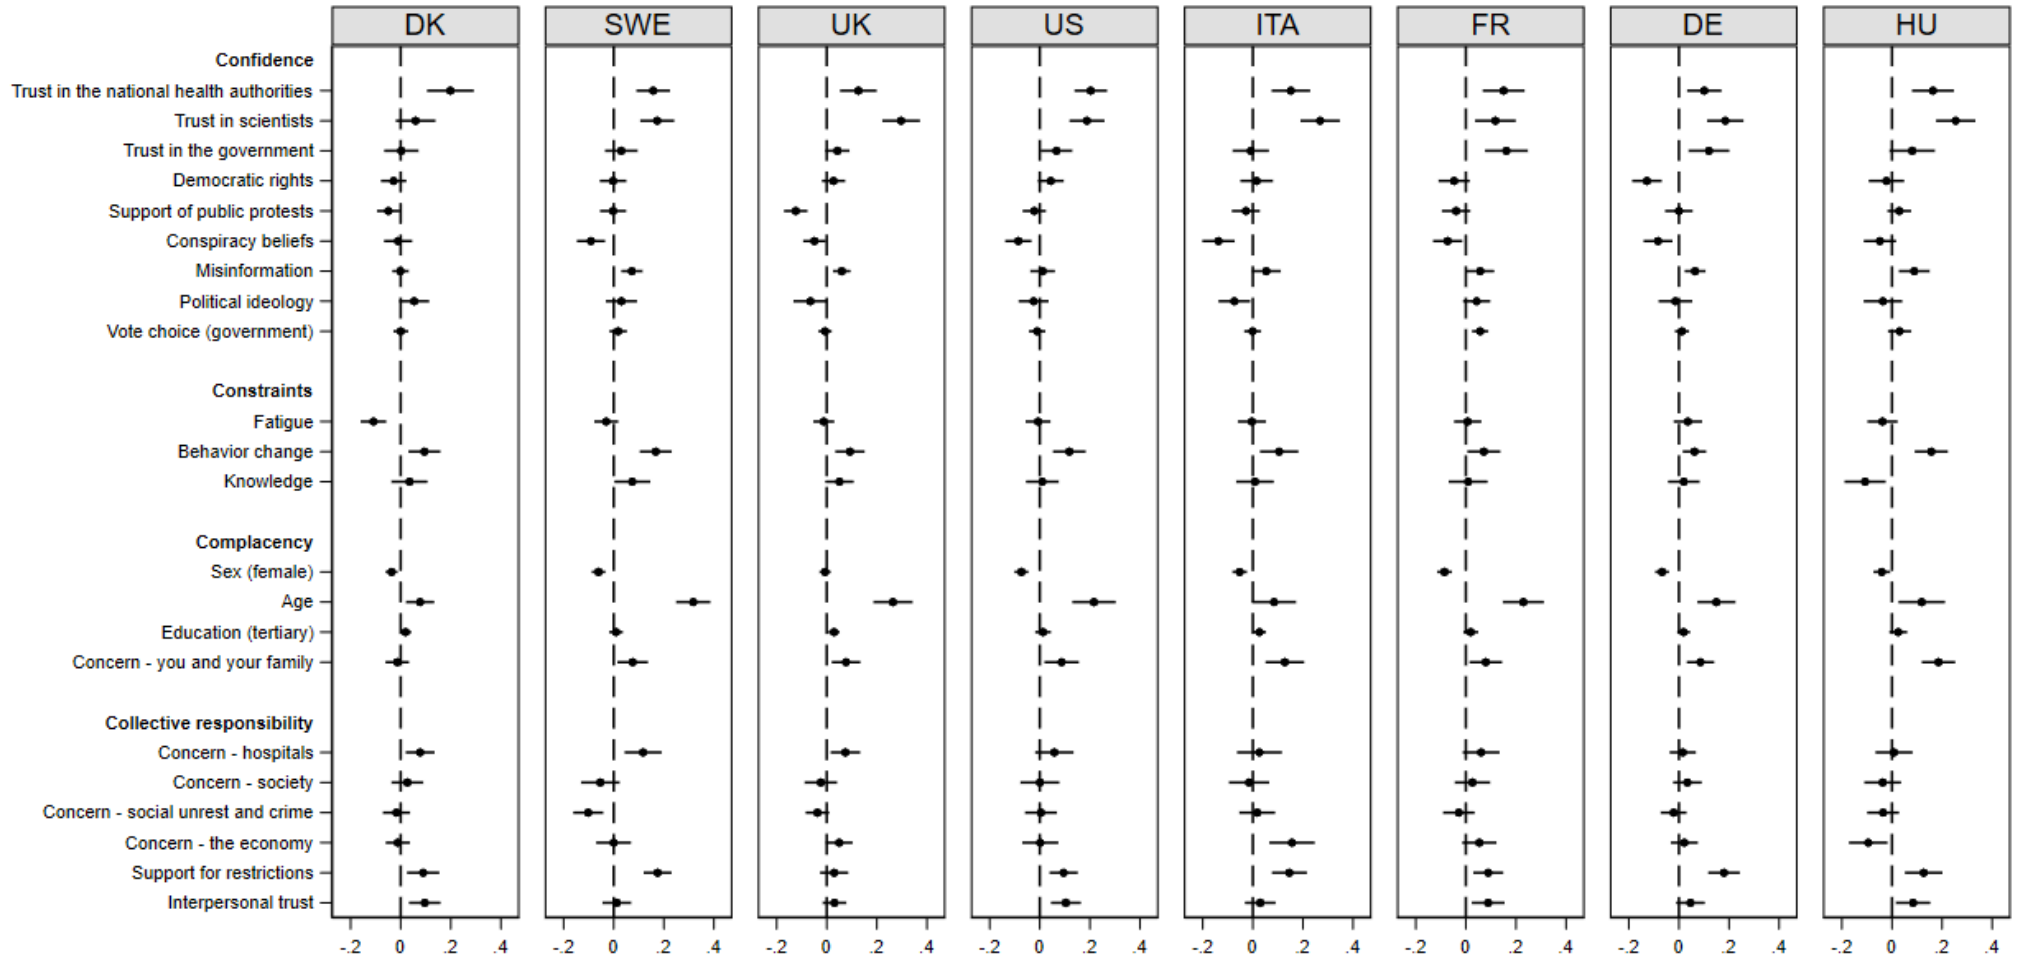

Note: N = 18,231. Black circles are the estimated correlations. Horizontal bars are the associated 95 % confidence intervals.



Figure A3: Bivariate correlations by country

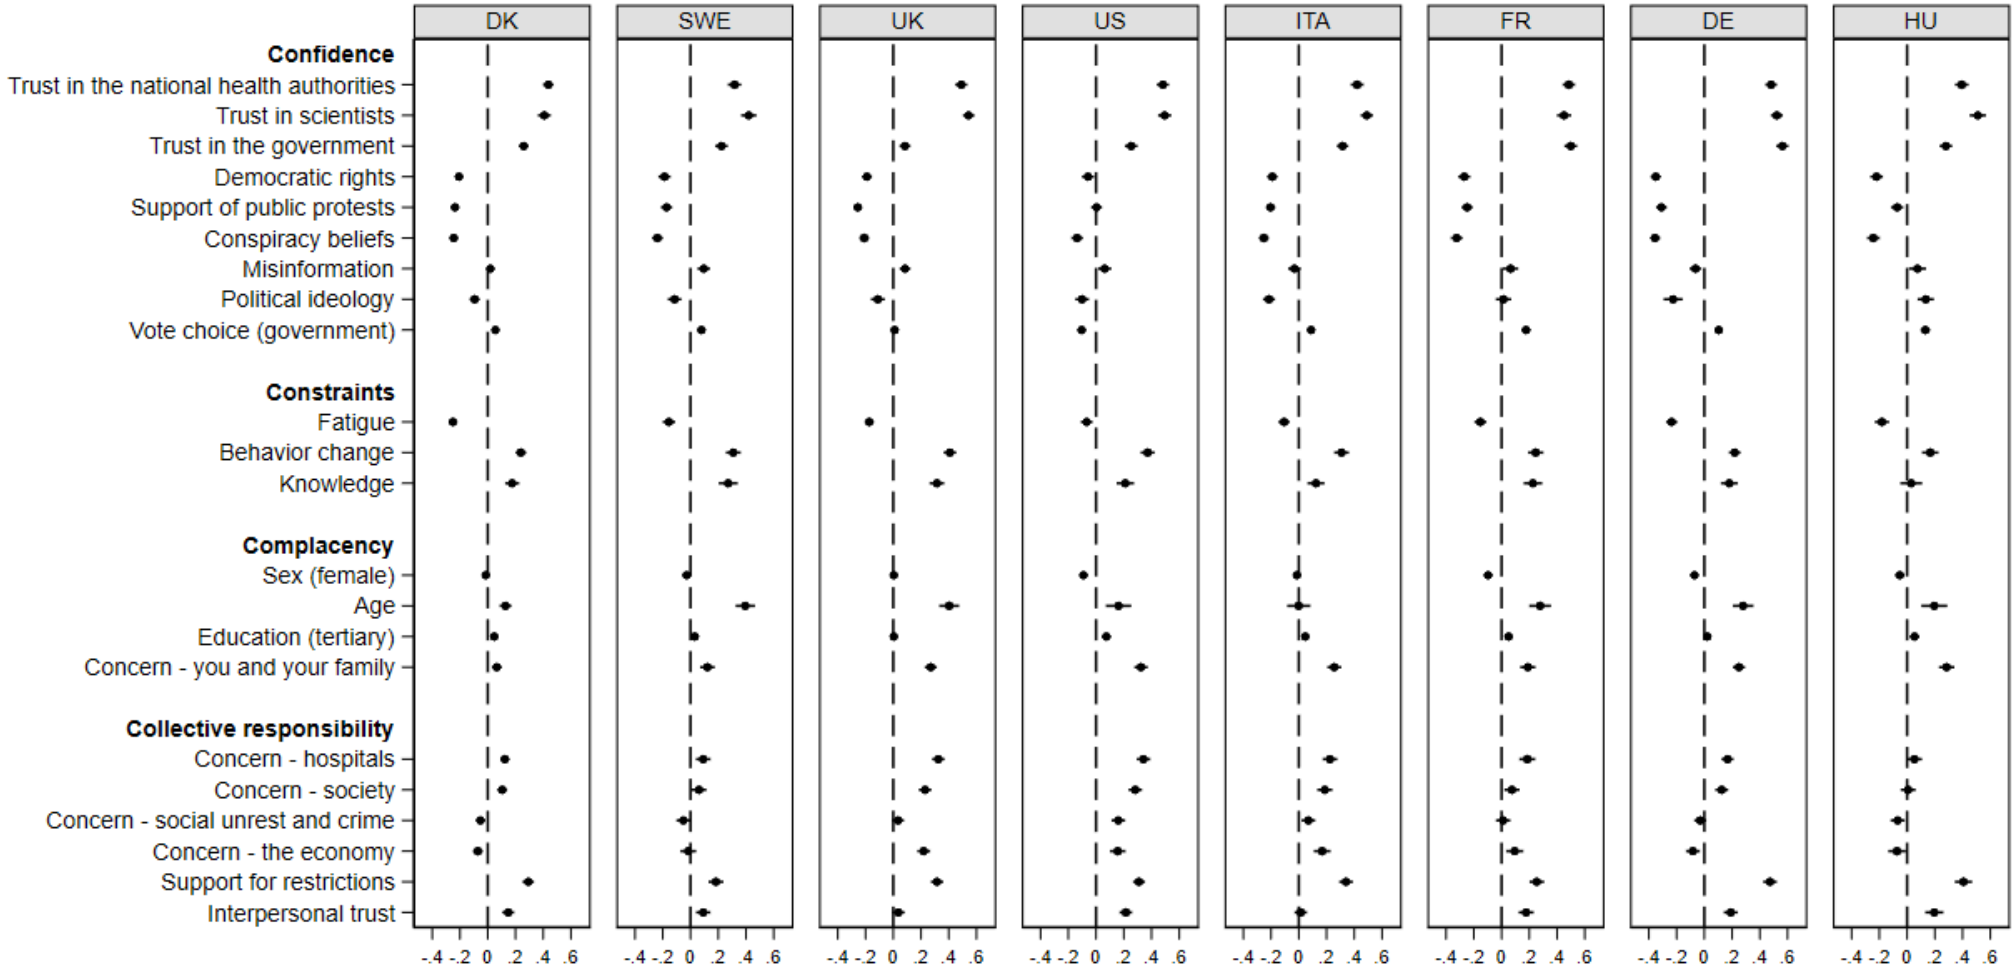

Note: N = 18,231. Black circles are the estimated bivariate correlations. Horizontal bars are the associated 95 % confidence intervals.

**Figure A4:** Replicating the analysis with categorical trust variables

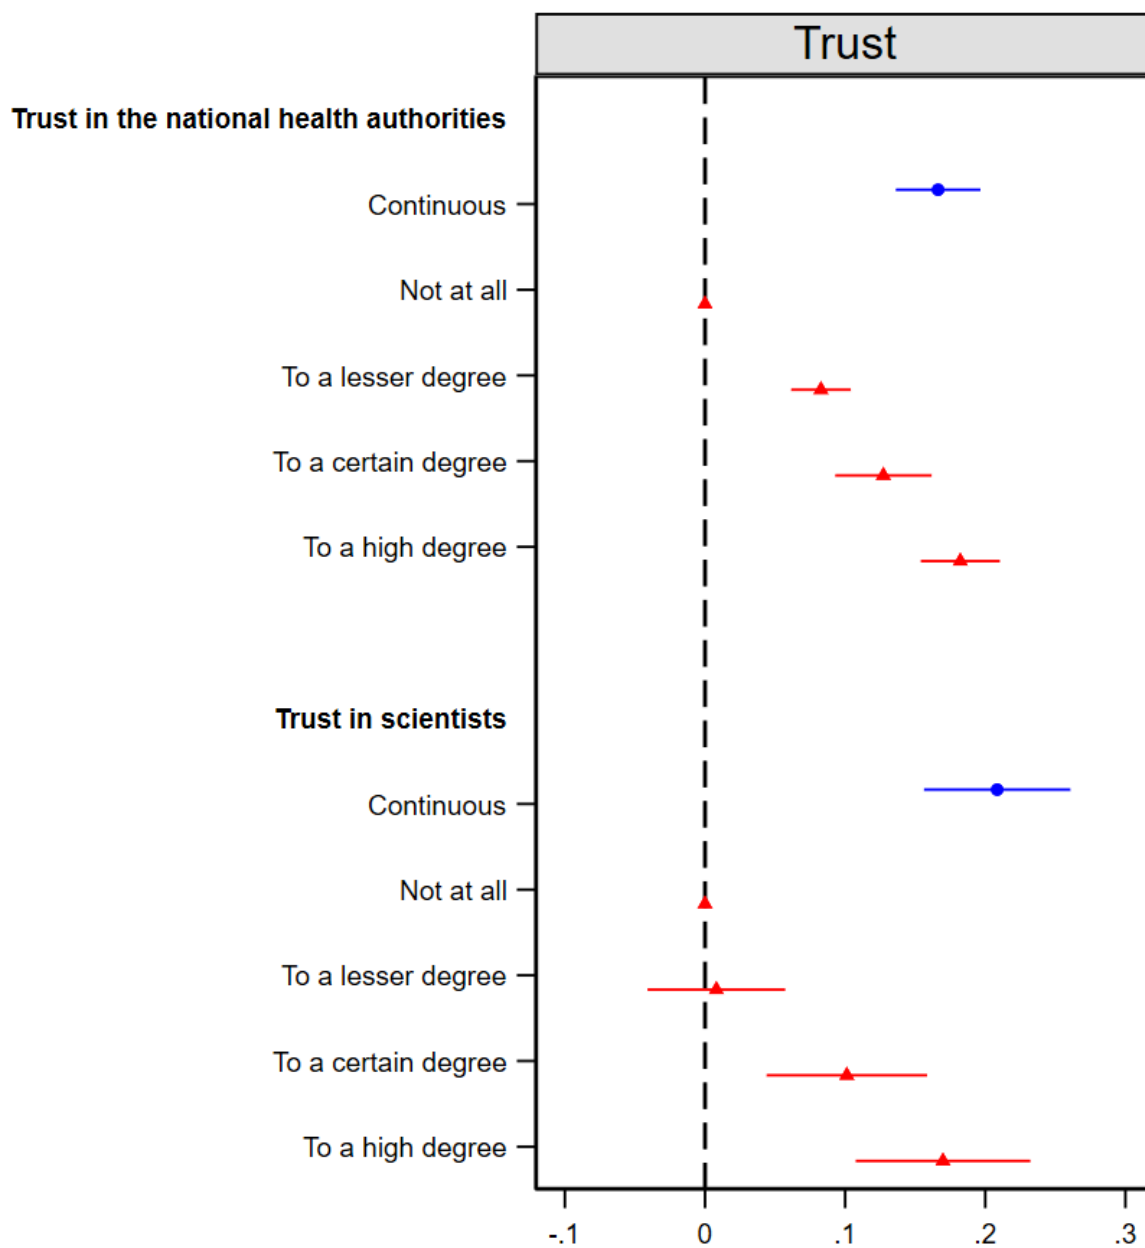

Note: N = 18,231. Blue circles are the estimated correlations based on model II in Table A4 (continuous trust variables). Red triangles are the estimated correlations based on the same model, using categorical trust variables instead. Both models include control for country dummies. Horizontal lines are the associated 95 % confidence intervals.

**Figure A5:** Replicating the analysis with categorical concern variables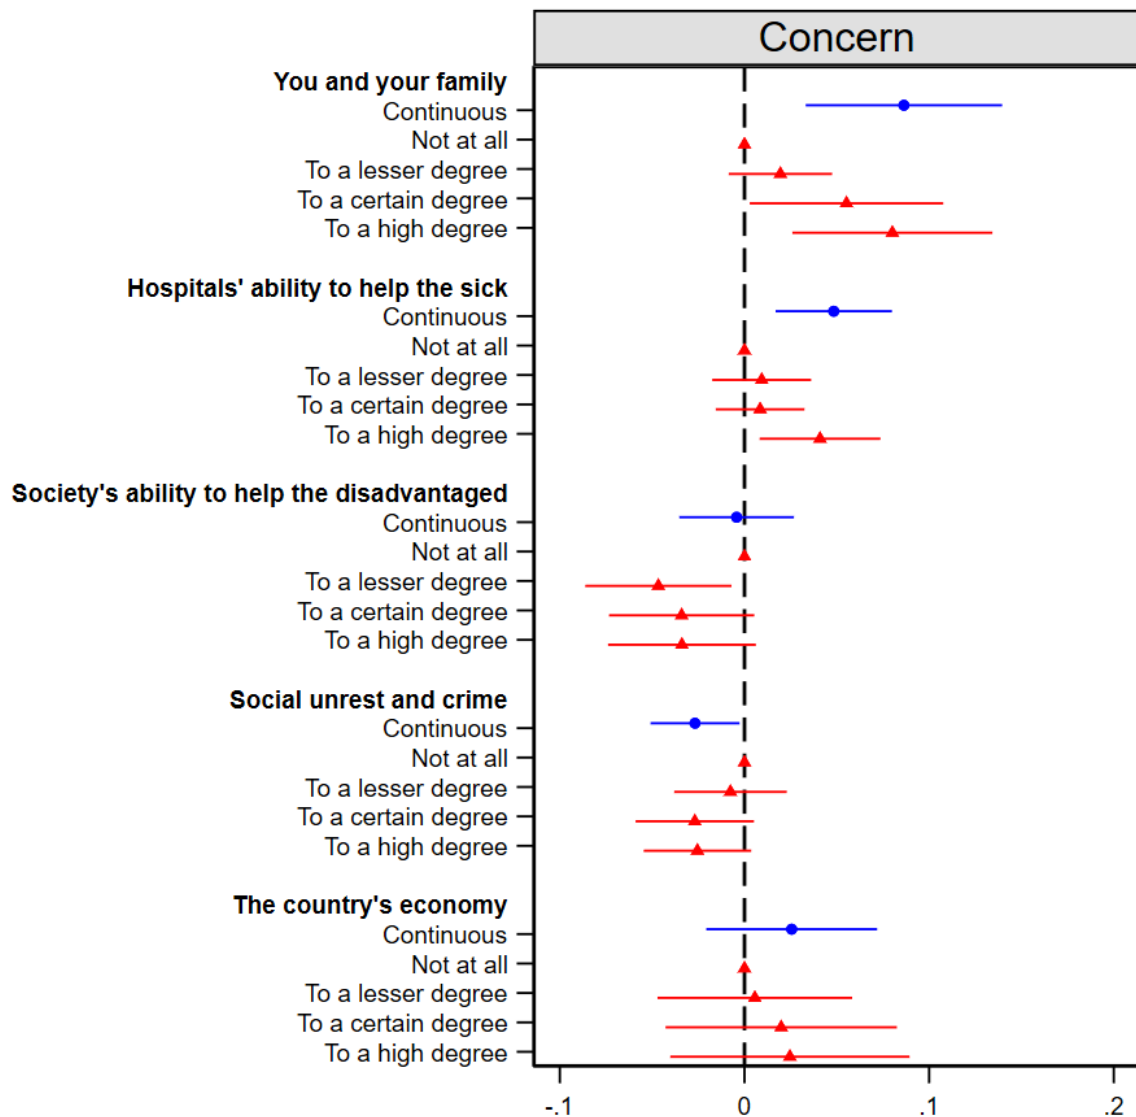

Note: N=18,231. Blue circles are the estimated correlations based on model II in Table A4 (continuous concern variables). Red triangles are the estimated correlations based on the same model, using categorical concern variables instead. Both models include control for country dummies. Horizontal lines are the associated 95 % confidence intervals.

**Figure A6:** Replicating the analysis with a categorical behavior change variable

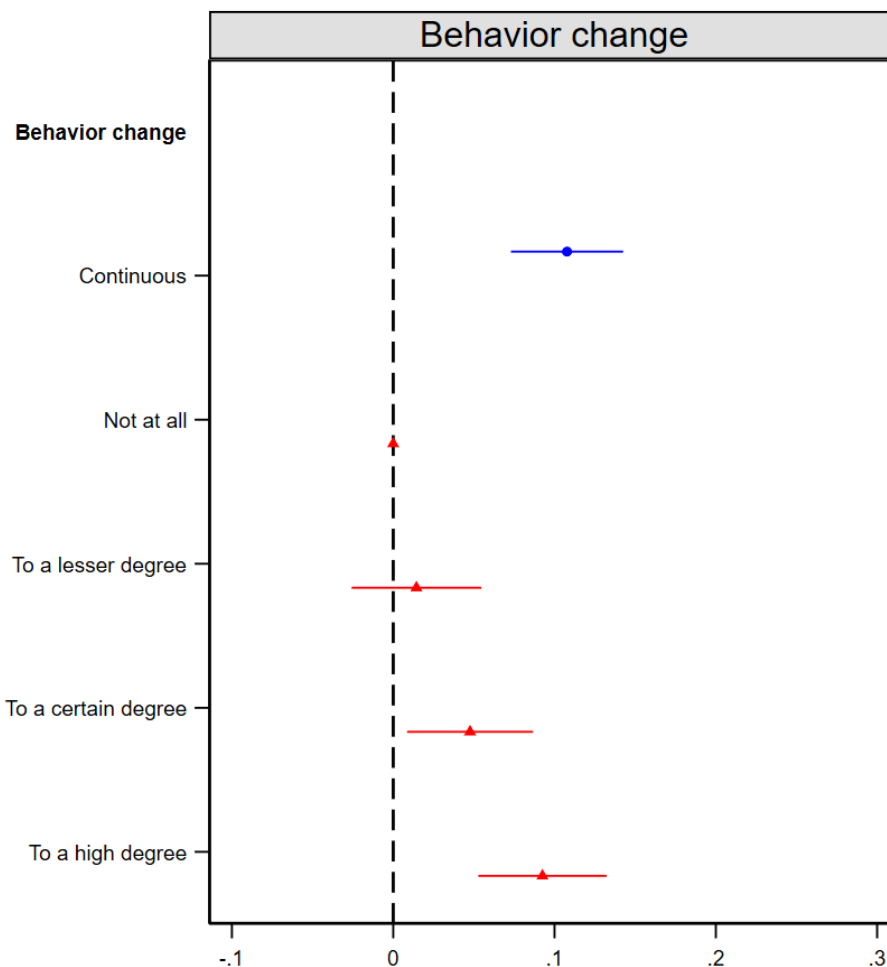

Note: N = 18,231. Blue circles are the estimated correlations based on model II in Table A4 (continuous behavior change variable). Red triangles are the estimated correlations based on the same model, using a categorical behavior change variable instead. Both models include control for country dummies. Horizontal lines are the associated 95 % confidence intervals.

**Figure A7:** Replicating the analysis with a categorical knowledge variable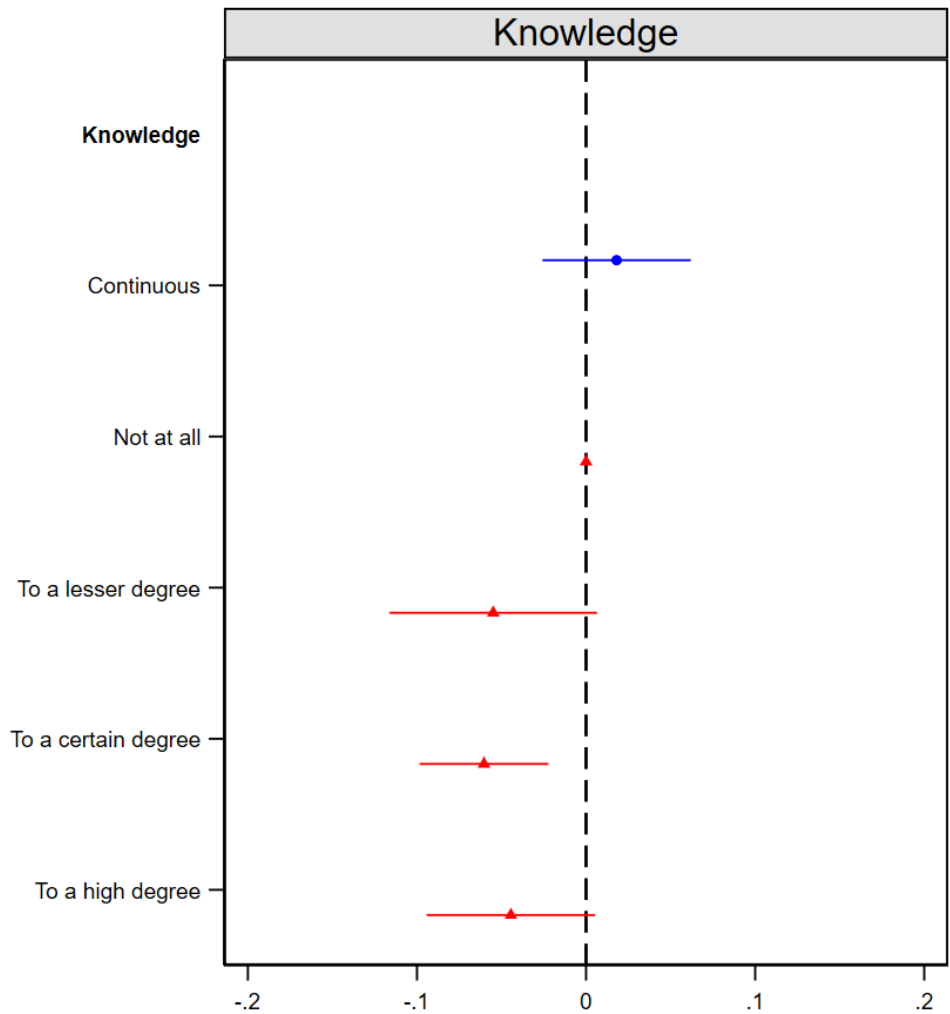

Note: N = 18,231. Blue circles are the estimated correlations based on model II in Table A4 (continuous knowledge variable). Red triangles are the estimated correlations based on the same model, using a categorical knowledge variable instead. Both models include control for country dummies. Horizontal lines are the associated 95 % confidence intervals.

**Figure A8:** Replicating the analysis with a dichotomous vaccine acceptance outcome

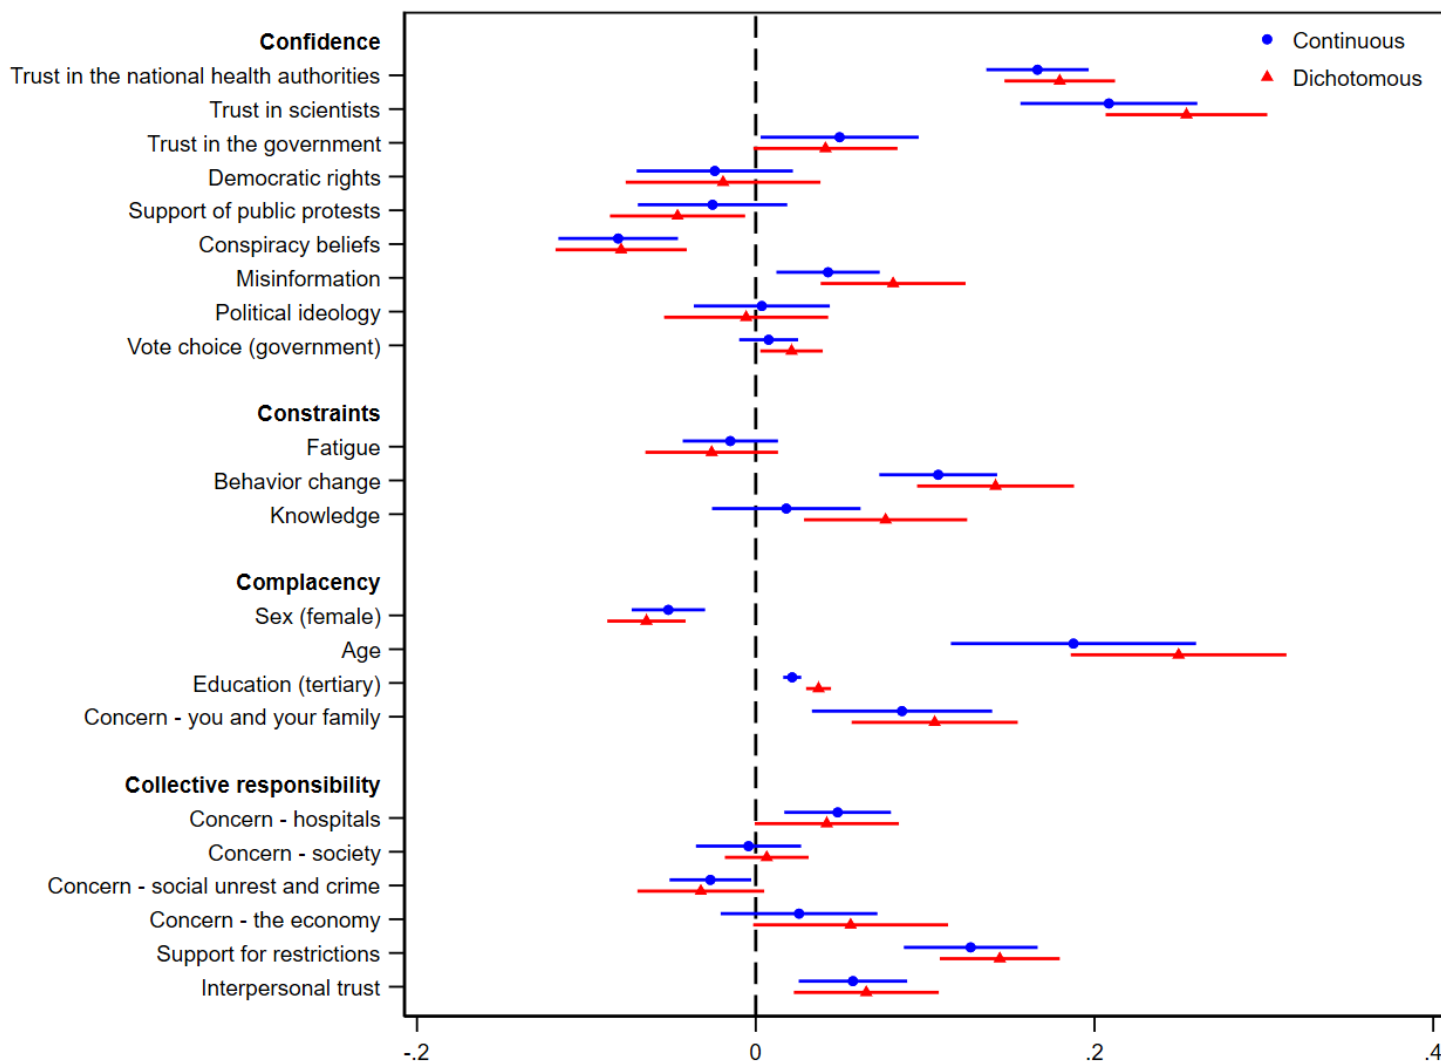

Note: N = 18,231. Blue circles are the estimated correlations based on model II in Table A4 (continuous outcome). Red triangles are the estimated correlations based on the same model, using a dichotomous measure of vaccine acceptance instead (with “somewhat agree” and “completely agree” taking the value 1, indicating vaccine acceptance). Both models include control for country dummies. Horizontal lines are the associated 95 % confidence intervals.

**Figure A9:** Comparing results before and after approval of COVID-19 vaccines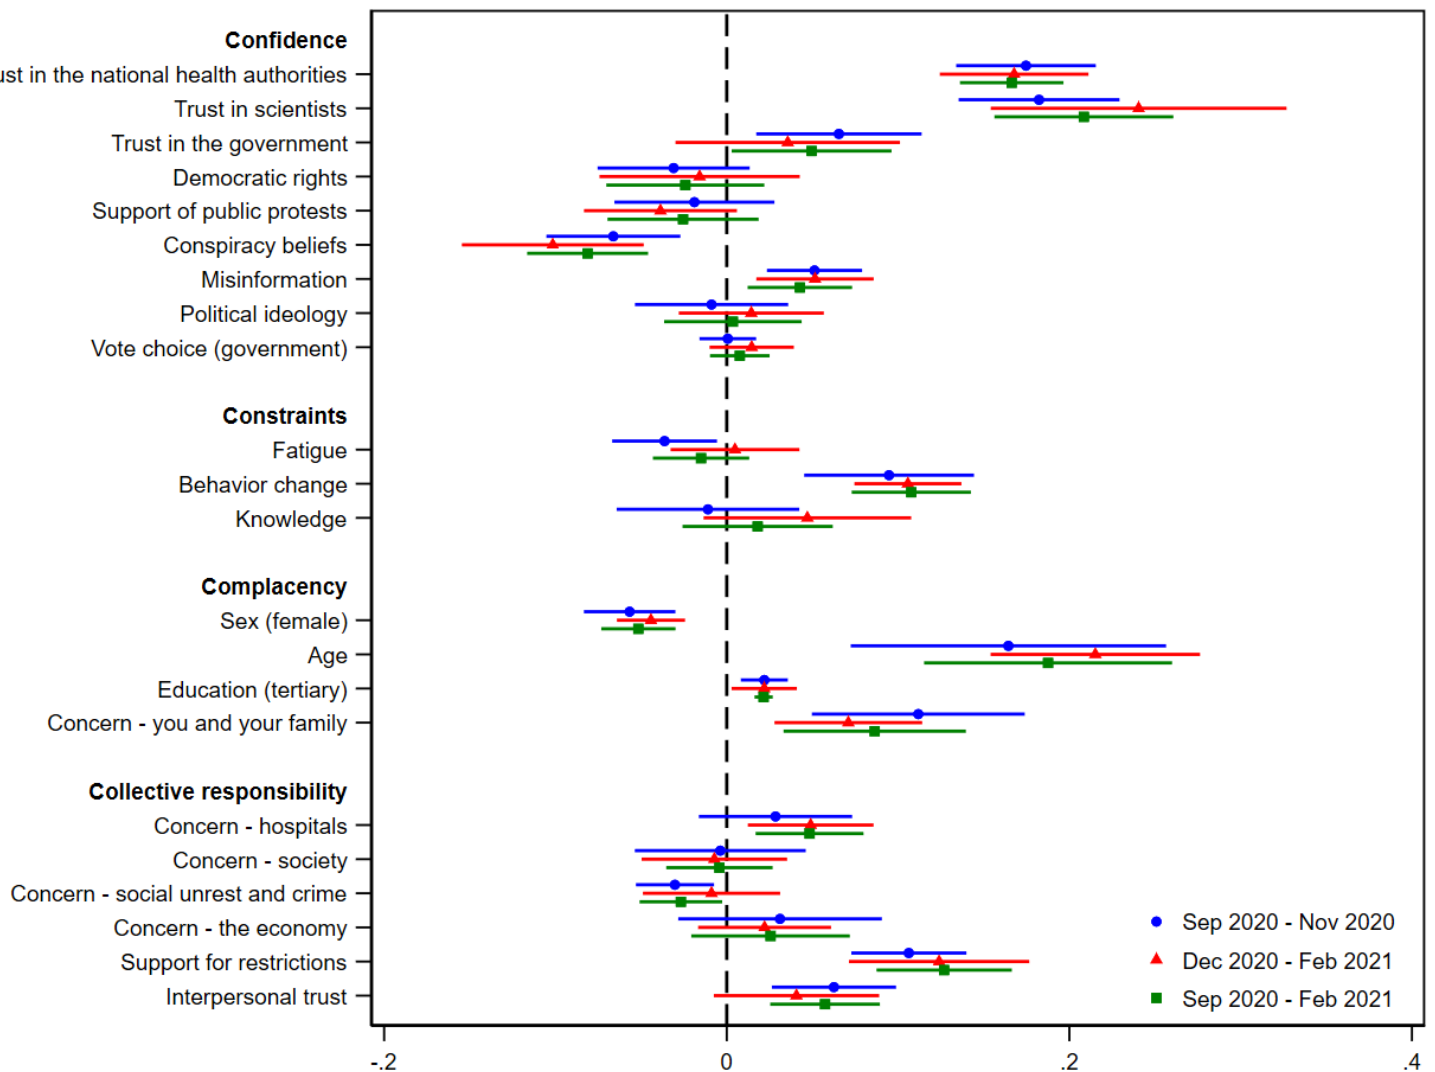

Note: N = 10,417 (September 2020 – November 2020). N = 7,814 (December 2020 – February 2021). N = 18,231 (September 2020 – February 2021). Green squares are the estimated correlations based on model II in Table A4 (September 2020 - November 2020). Blue circles are the estimated correlations based on the same model for September 2020 – November 2020. Red triangles are the estimated correlations based on the same model for December 2020 – February 2021. All models include control for country dummies. Horizontal lines are the associated 95 % confidence intervals.

**Figure A10:** Individual-level predictors in the US, controlling for region dummies

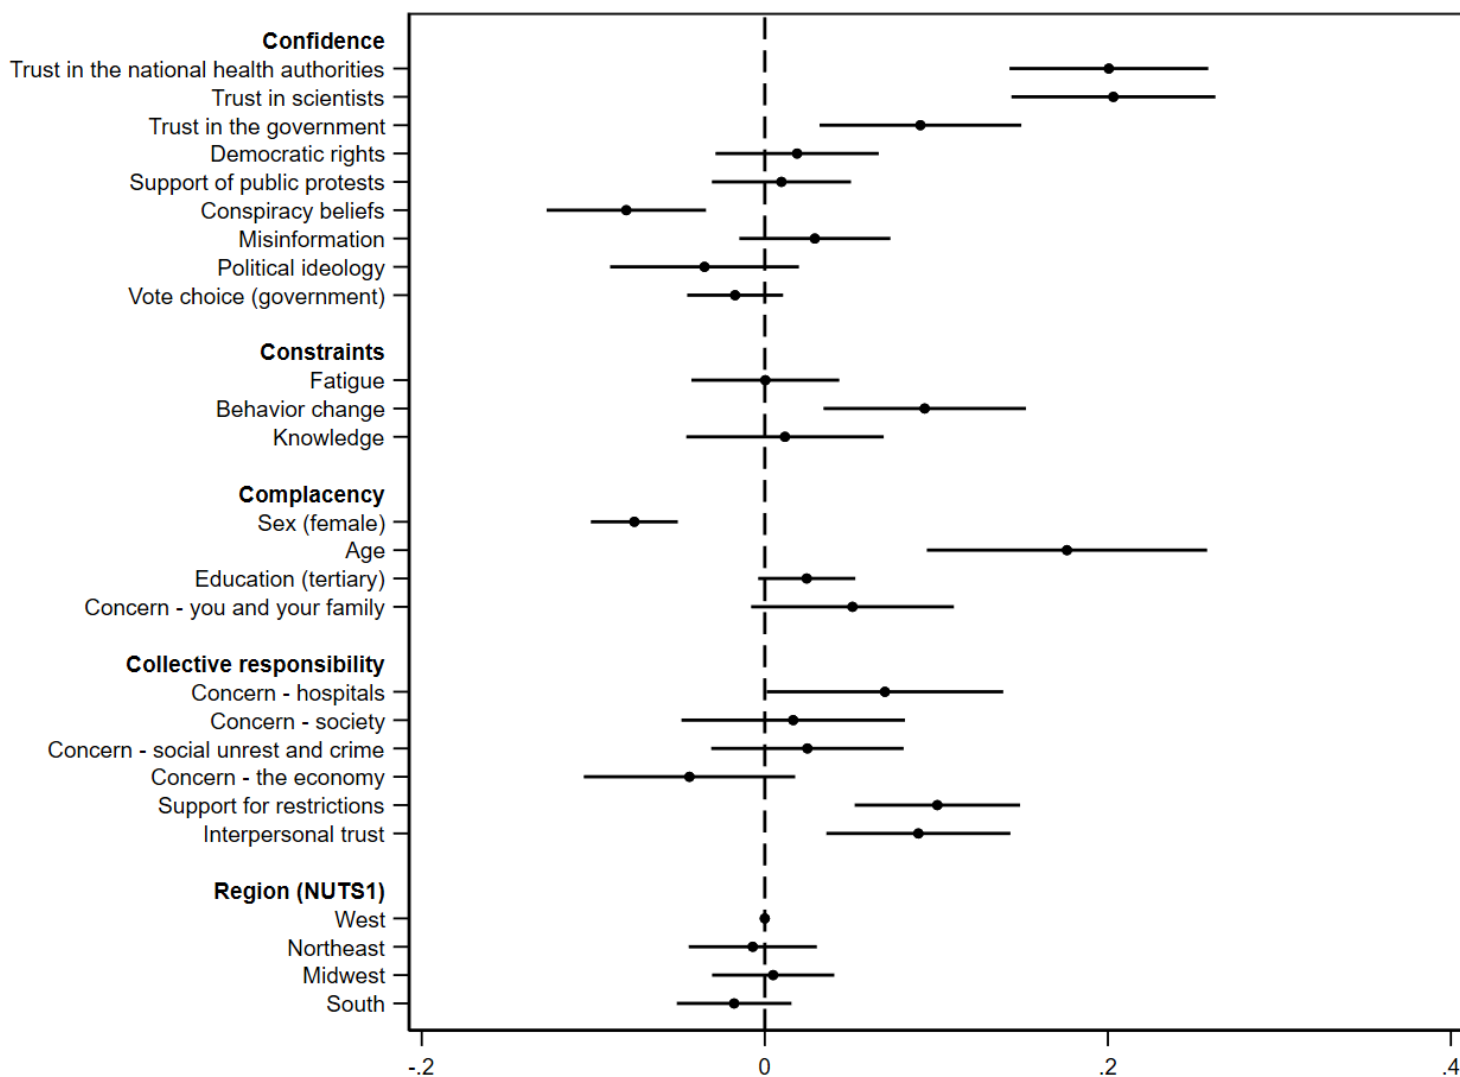

Note: N = 2,185. Circles are the estimated correlations. Horizontal lines are the associated 95 % confidence intervals.



**Figure A11:** Individual-level predictors in the US, controlling for state dummies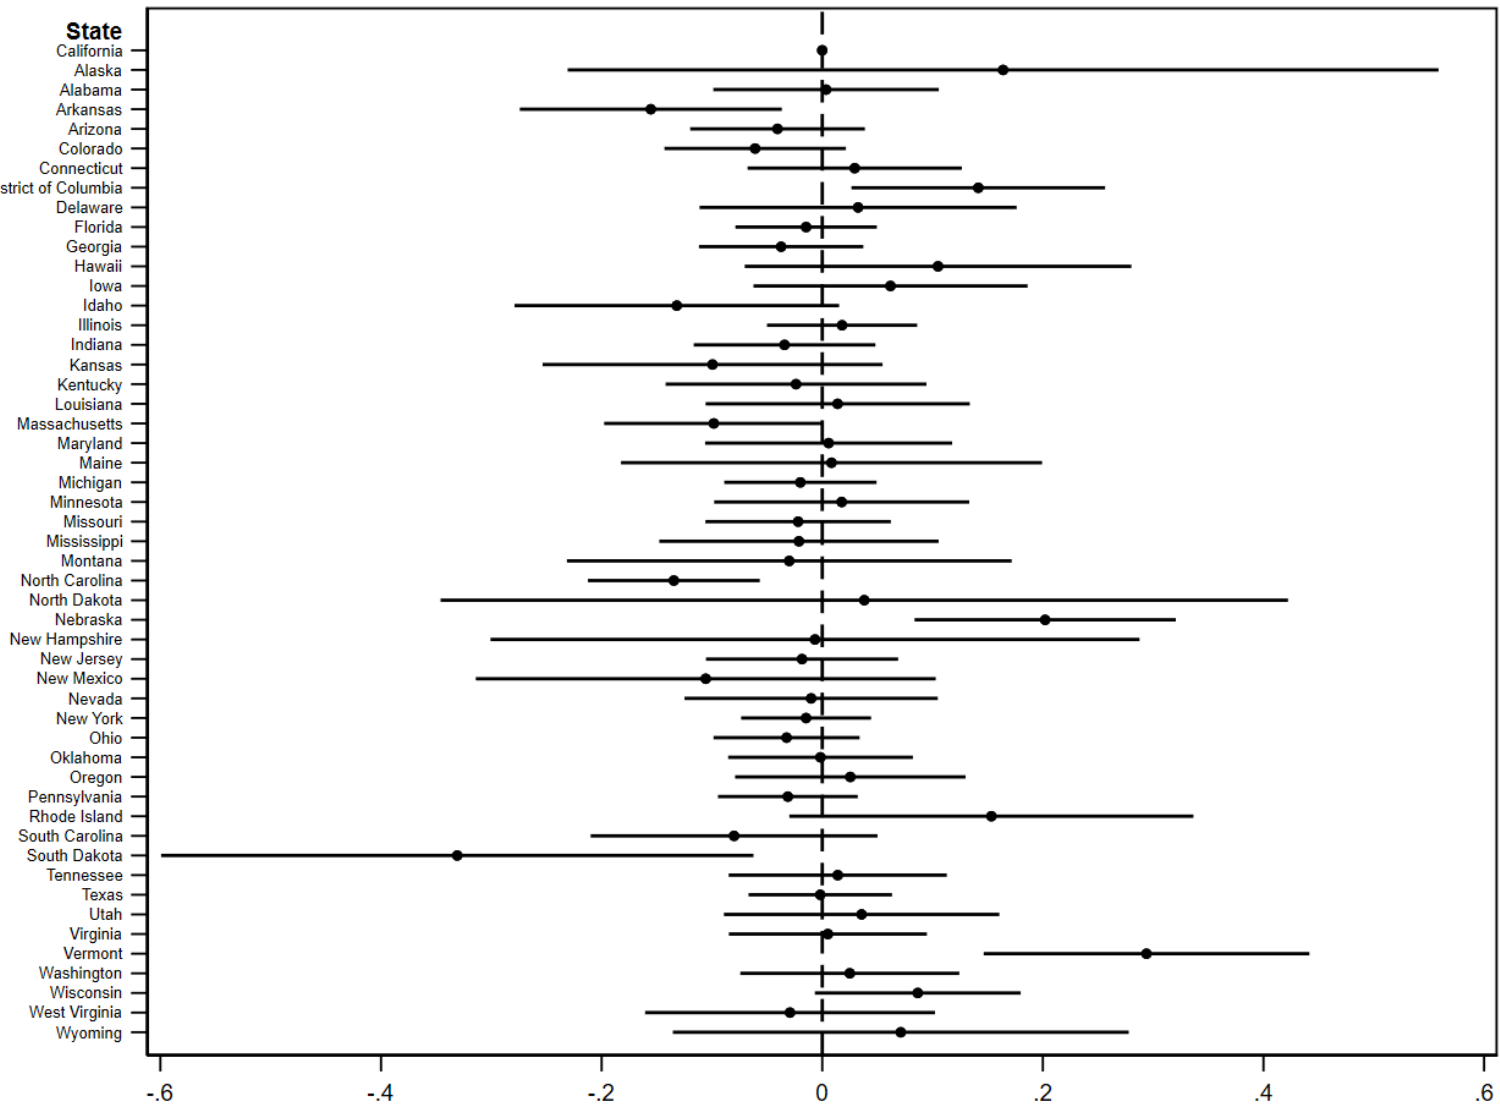

Note:  $N = 2,185$ . Circles are the estimated correlations. The model include all predictors from model II in table A4, controlling for state dummies instead of country level dummies. For simplicity, only the estimated correlations for the state dummies are illustrated here. Horizontal lines are the associated 95% confidence intervals.

**Figure A12: Individual-level predictors in Germany, controlling for state dummies**

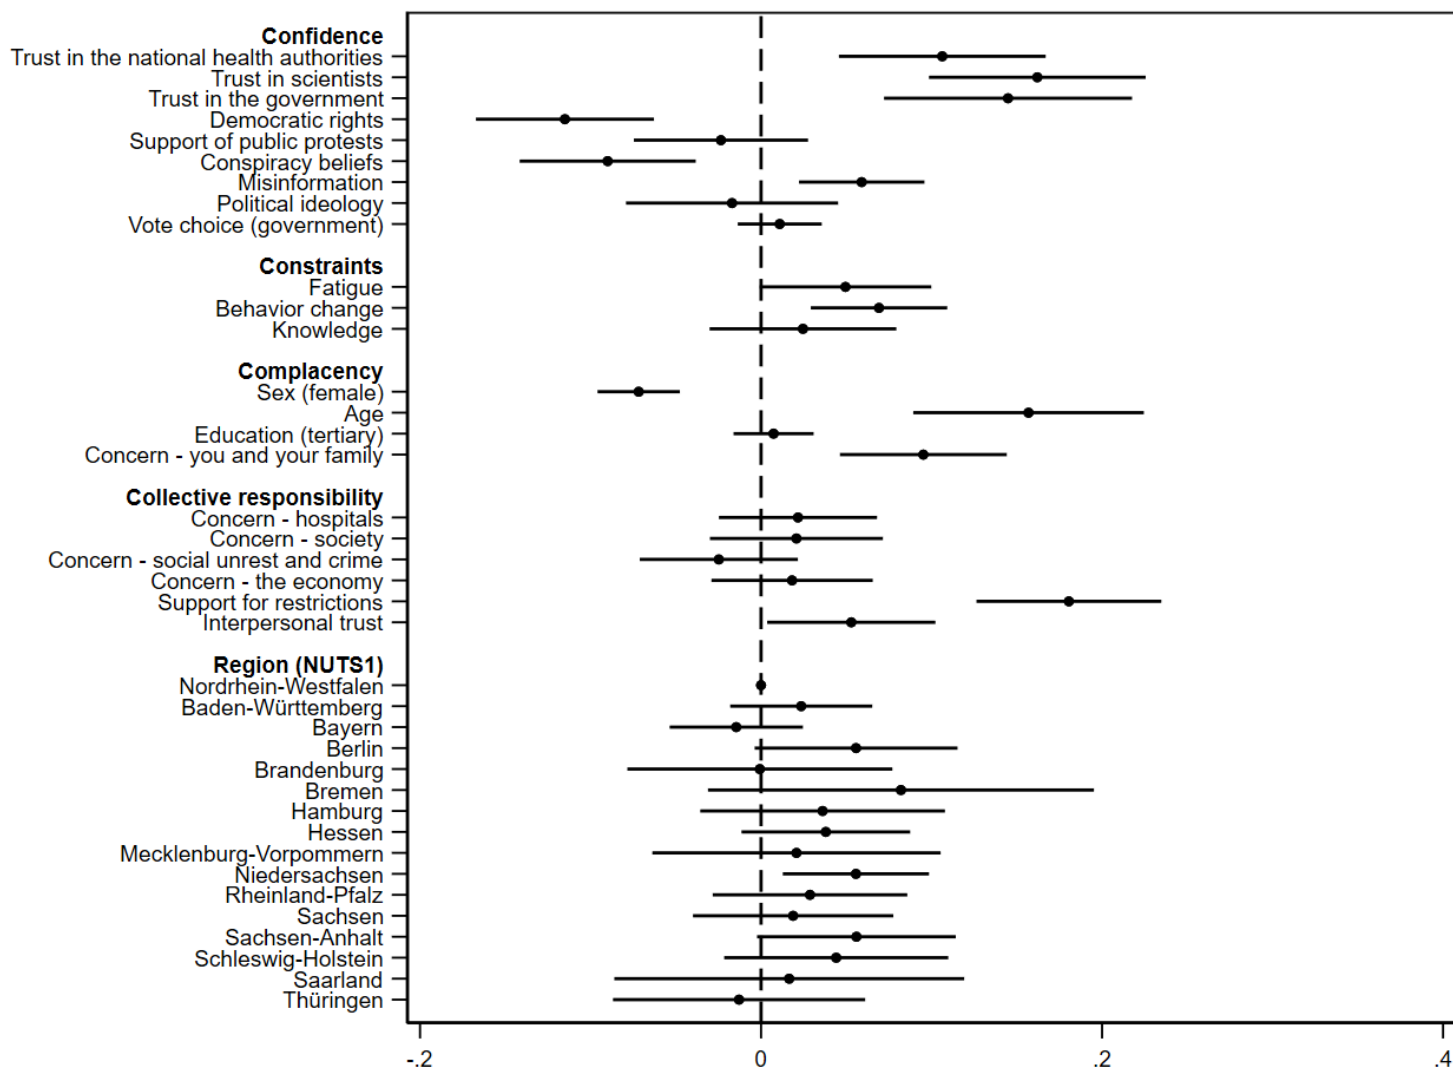

Note: N = 2,380. Circles are the estimated correlations. Horizontal lines are the associated 95 % confidence intervals.

**Figure A13:** Subgroup analysis – sex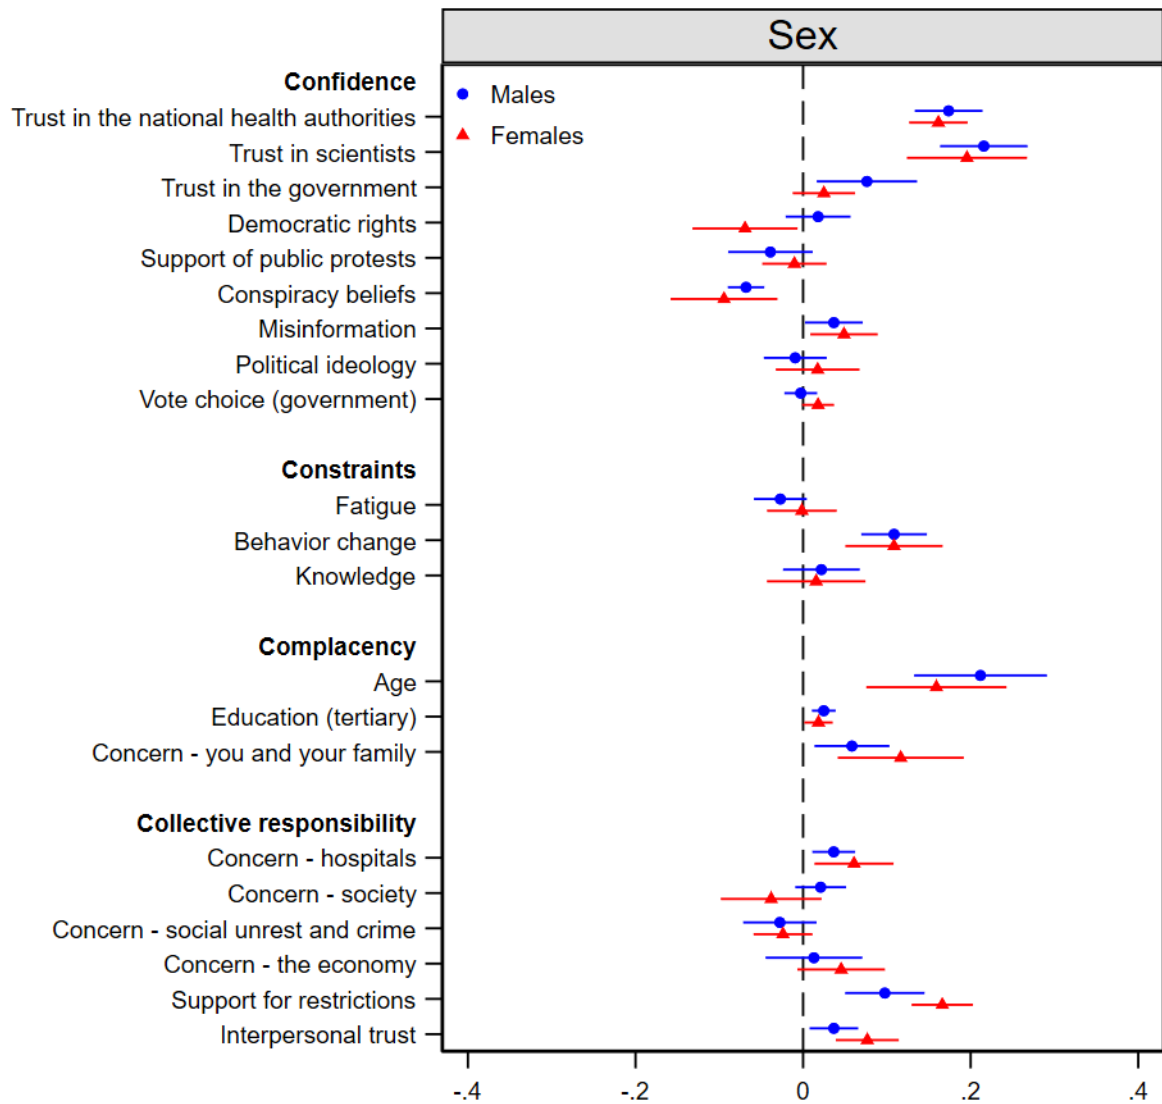

Note: N = 18,231. Blue circles and red triangles are the estimated correlations. Horizontal lines are the associated 95 % confidence intervals.

**Figure A14:** Subgroup analysis – age

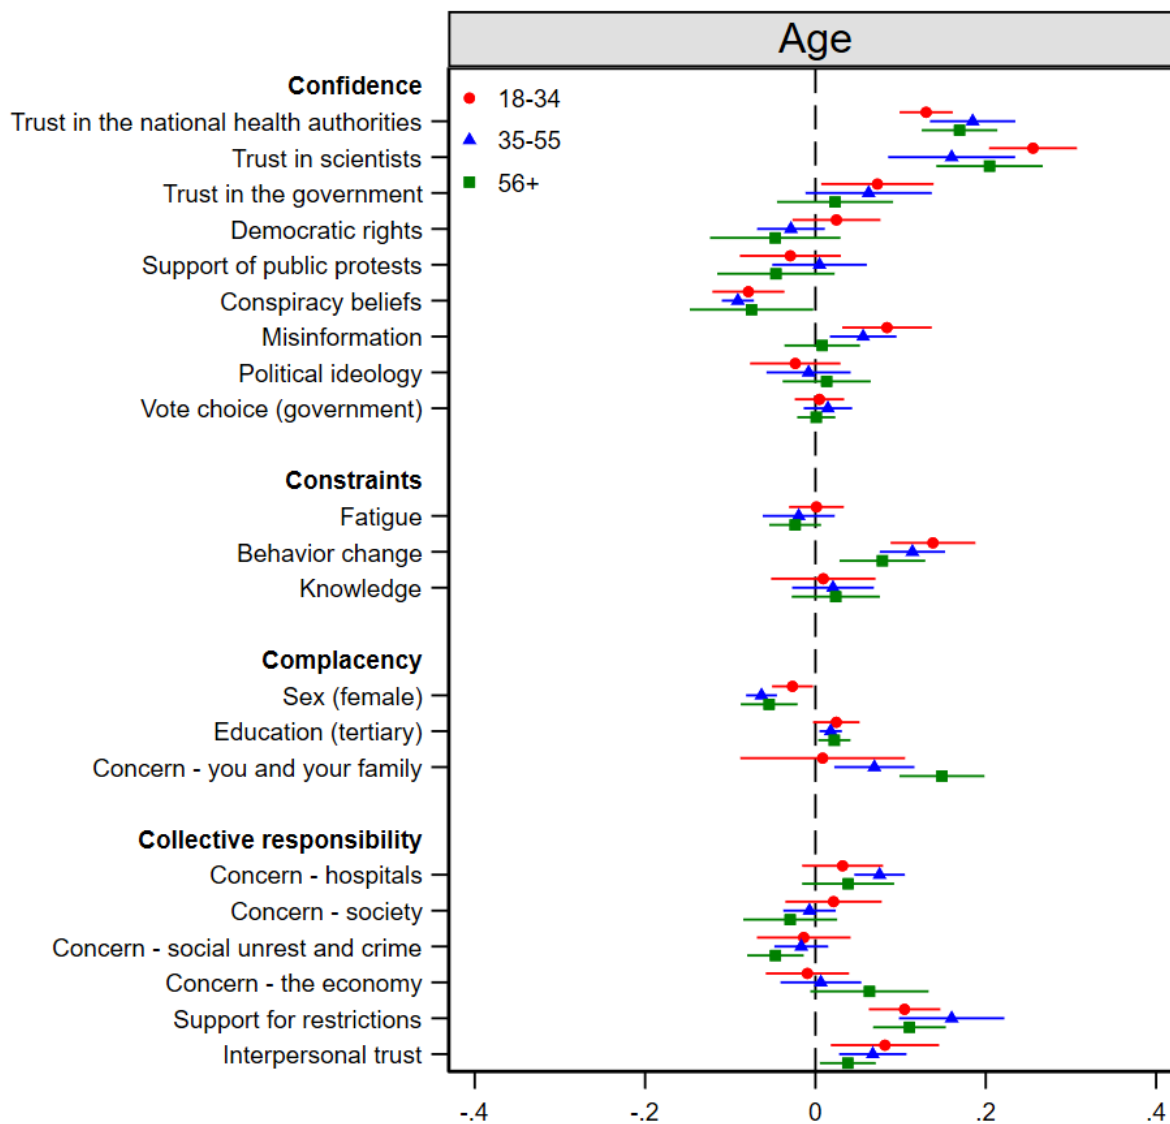

Note: N = 18,231. Red circles, blue triangles and green squares are the estimated correlations. Horizontal lines are the associated 95 % confidence intervals.

**Figure A15: Subgroup analysis – education**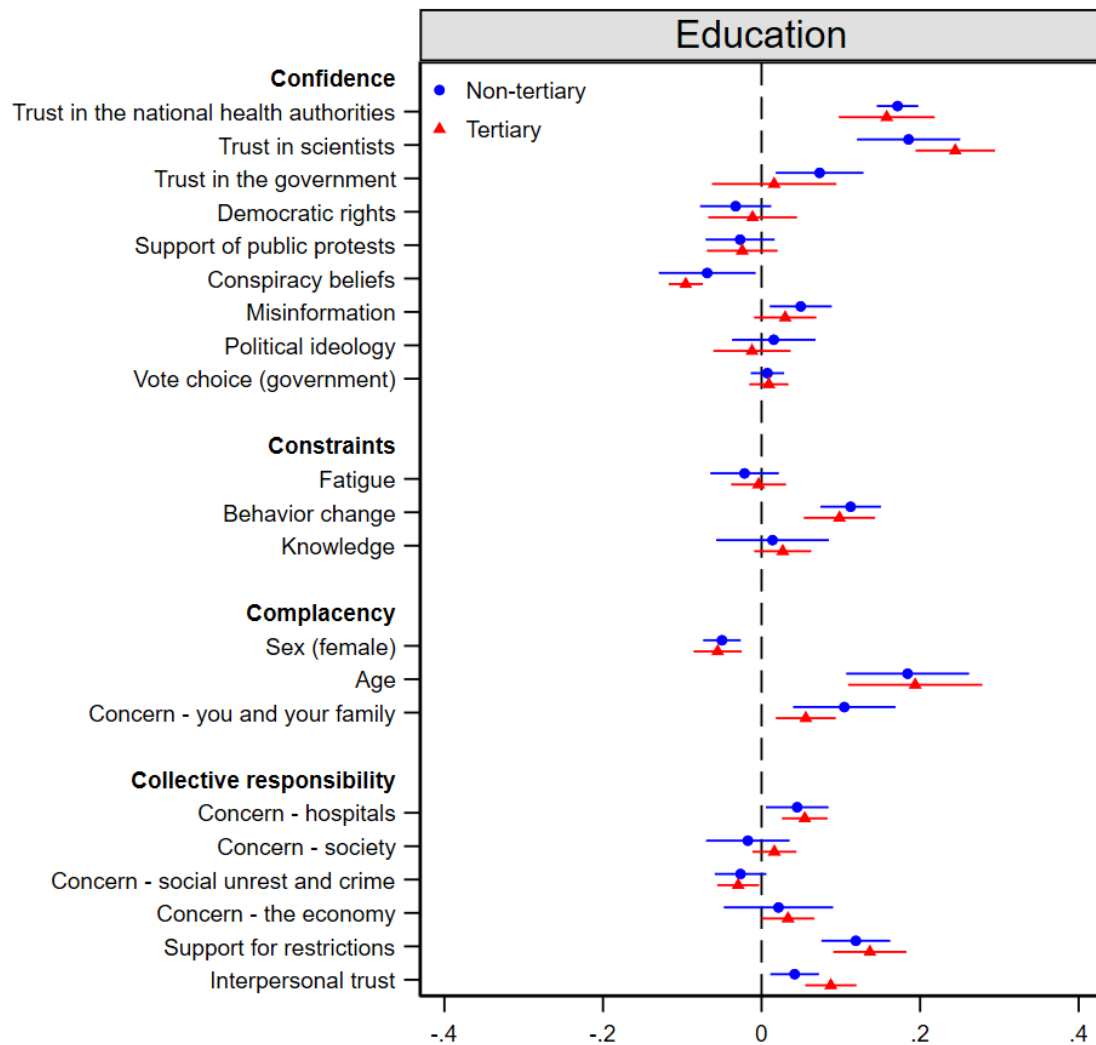

Note: N = 18,231. Blue circles and red triangles are the estimated correlations. Horizontal lines are the associated 95 % confidence intervals.

Figure A16: Macro-level correlations of vaccine acceptance

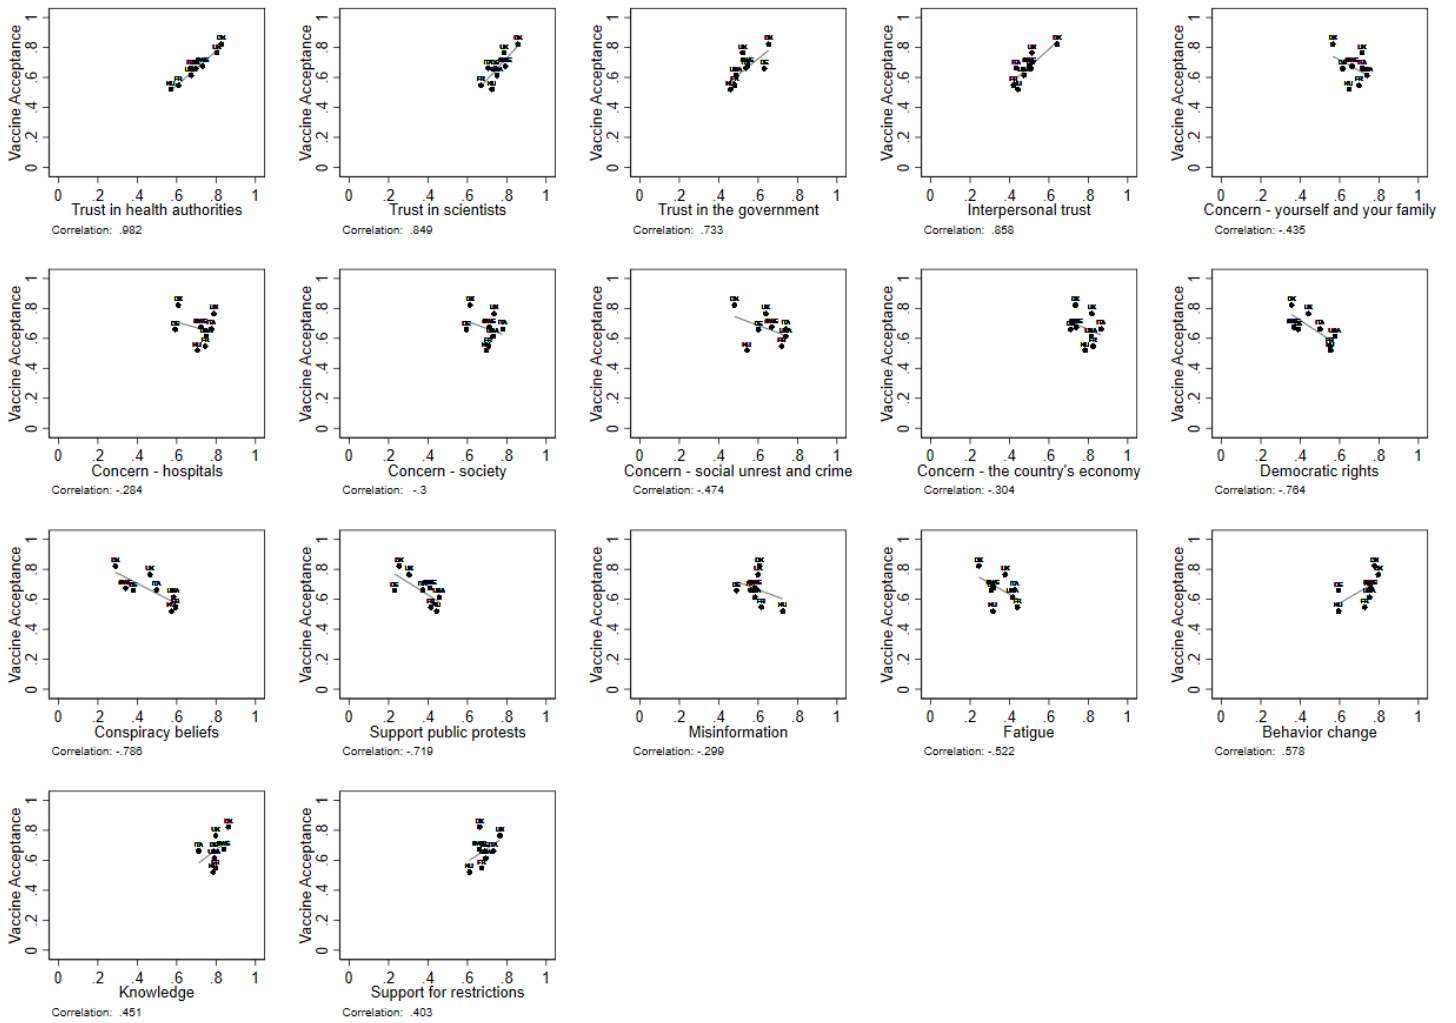

Note: The figure plots country averages for vaccine acceptance and country averages for the range of non-background measures. Reported correlations are Pearson's r.

**STROBE 2007 (v4) Statement—Checklist of items that should be included in reports of *cross-sectional studies***

| Section/Topic                | Item # | Recommendation                                                                                                                                                                       | Reported on page # |
|------------------------------|--------|--------------------------------------------------------------------------------------------------------------------------------------------------------------------------------------|--------------------|
| <b>Title and abstract</b>    | 1      | (a) Indicate the study's design with a commonly used term in the title or the abstract                                                                                               | 0                  |
|                              |        | (b) Provide in the abstract an informative and balanced summary of what was done and what was found                                                                                  | 1                  |
| <b>Introduction</b>          |        |                                                                                                                                                                                      |                    |
| Background/rationale         | 2      | Explain the scientific background and rationale for the investigation being reported                                                                                                 | 3                  |
| Objectives                   | 3      | State specific objectives, including any prespecified hypotheses                                                                                                                     | 3                  |
| <b>Methods</b>               |        |                                                                                                                                                                                      |                    |
| Study design                 | 4      | Present key elements of study design early in the paper                                                                                                                              | 7-8                |
| Setting                      | 5      | Describe the setting, locations, and relevant dates, including periods of recruitment, exposure, follow-up, and data collection                                                      | 7-8                |
| Participants                 | 6      | (a) Give the eligibility criteria, and the sources and methods of selection of participants                                                                                          | 7-8                |
| Variables                    | 7      | Clearly define all outcomes, exposures, predictors, potential confounders, and effect modifiers. Give diagnostic criteria, if applicable                                             | 8-12               |
| Data sources/<br>measurement | 8*     | For each variable of interest, give sources of data and details of methods of assessment (measurement). Describe comparability of assessment methods if there is more than one group | 8-12               |
| Bias                         | 9      | Describe any efforts to address potential sources of bias                                                                                                                            |                    |
| Study size                   | 10     | Explain how the study size was arrived at                                                                                                                                            | 7                  |
| Quantitative variables       | 11     | Explain how quantitative variables were handled in the analyses. If applicable, describe which groupings were chosen and why                                                         | 11-12              |
| Statistical methods          | 12     | (a) Describe all statistical methods, including those used to control for confounding                                                                                                | 12-13              |
|                              |        | (b) Describe any methods used to examine subgroups and interactions                                                                                                                  |                    |
|                              |        | (c) Explain how missing data were addressed                                                                                                                                          | 12                 |
|                              |        | (d) If applicable, describe analytical methods taking account of sampling strategy                                                                                                   |                    |
|                              |        | (e) Describe any sensitivity analyses                                                                                                                                                | 12-13              |
| <b>Results</b>               |        |                                                                                                                                                                                      |                    |

|                          |     |                                                                                                                                                                                                                                                                                                                                                                                                               |                                       |
|--------------------------|-----|---------------------------------------------------------------------------------------------------------------------------------------------------------------------------------------------------------------------------------------------------------------------------------------------------------------------------------------------------------------------------------------------------------------|---------------------------------------|
| Participants             | 13* | (a) Report numbers of individuals at each stage of study—eg numbers potentially eligible, examined for eligibility, confirmed eligible, included in the study, completing follow-up, and analysed<br>(b) Give reasons for non-participation at each stage<br>(c) Consider use of a flow diagram                                                                                                               | 2 + Table A1 in the OA                |
| Descriptive data         | 14* | (a) Give characteristics of study participants (eg demographic, clinical, social) and information on exposures and potential confounders<br>(b) Indicate number of participants with missing data for each variable of interest                                                                                                                                                                               | Table A2 in the OA                    |
| Outcome data             | 15* | Report numbers of outcome events or summary measures                                                                                                                                                                                                                                                                                                                                                          | 11 + Figure 1                         |
| Main results             | 16  | (a) Give unadjusted estimates and, if applicable, confounder-adjusted estimates and their precision (eg, 95% confidence interval). Make clear which confounders were adjusted for and why they were included<br>(b) Report category boundaries when continuous variables were categorized<br>(c) If relevant, consider translating estimates of relative risk into absolute risk for a meaningful time period | 14-16 + Figure 2 + Table A4 in the OA |
| Other analyses           | 17  | Report other analyses done—eg analyses of subgroups and interactions, and sensitivity analyses                                                                                                                                                                                                                                                                                                                | 16 + OA                               |
| <b>Discussion</b>        |     |                                                                                                                                                                                                                                                                                                                                                                                                               |                                       |
| Key results              | 18  | Summarise key results with reference to study objectives                                                                                                                                                                                                                                                                                                                                                      | 16-17                                 |
| Limitations              | 19  | Discuss limitations of the study, taking into account sources of potential bias or imprecision. Discuss both direction and magnitude of any potential bias                                                                                                                                                                                                                                                    | 18                                    |
| Interpretation           | 20  | Give a cautious overall interpretation of results considering objectives, limitations, multiplicity of analyses, results from similar studies, and other relevant evidence                                                                                                                                                                                                                                    |                                       |
| Generalisability         | 21  | Discuss the generalisability (external validity) of the study results                                                                                                                                                                                                                                                                                                                                         | 18                                    |
| <b>Other information</b> |     |                                                                                                                                                                                                                                                                                                                                                                                                               |                                       |
| Funding                  | 22  | Give the source of funding and the role of the funders for the present study and, if applicable, for the original study on which the present article is based                                                                                                                                                                                                                                                 | 2                                     |

\*Give information separately for cases and controls in case-control studies and, if applicable, for exposed and unexposed groups in cohort and cross-sectional studies.

**Note:** An Explanation and Elaboration article discusses each checklist item and gives methodological background and published examples of transparent reporting. The STROBE checklist is best used in conjunction with this article (freely available on the Web sites of PLoS Medicine at <http://www.plosmedicine.org/>, Annals of Internal Medicine at <http://www.annals.org/>, and Epidemiology at <http://www.epidem.com/>). Information on the STROBE Initiative is available at [www.strobe-statement.org](http://www.strobe-statement.org).



# BMJ Open

## Public Acceptance of COVID-19 Vaccines: Cross-National Evidence on Levels and Individual-Level Predictors Using Observational Data

|                                 |                                                                                                                                                                                                                                                                                      |
|---------------------------------|--------------------------------------------------------------------------------------------------------------------------------------------------------------------------------------------------------------------------------------------------------------------------------------|
| Journal:                        | <i>BMJ Open</i>                                                                                                                                                                                                                                                                      |
| Manuscript ID                   | bmjopen-2020-048172.R2                                                                                                                                                                                                                                                               |
| Article Type:                   | Original research                                                                                                                                                                                                                                                                    |
| Date Submitted by the Author:   | 16-May-2021                                                                                                                                                                                                                                                                          |
| Complete List of Authors:       | Lindholt, Marie Fly; Aarhus Universitet, Political Science<br>Jørgensen, Frederik; Aarhus University, Department of Political Science<br>Bor, Alexander; Aarhus University, Department of Political Science<br>Petersen, Michael; Aarhus University, Department of Political Science |
| <b>Primary Subject Heading</b>: | Public health                                                                                                                                                                                                                                                                        |
| Secondary Subject Heading:      | Epidemiology                                                                                                                                                                                                                                                                         |
| Keywords:                       | COVID-19, PUBLIC HEALTH, EPIDEMIOLOGY                                                                                                                                                                                                                                                |
|                                 |                                                                                                                                                                                                                                                                                      |

SCHOLARONE™  
Manuscripts



I, the Submitting Author has the right to grant and does grant on behalf of all authors of the Work (as defined in the below author licence), an exclusive licence and/or a non-exclusive licence for contributions from authors who are: i) UK Crown employees; ii) where BMJ has agreed a CC-BY licence shall apply, and/or iii) in accordance with the terms applicable for US Federal Government officers or employees acting as part of their official duties; on a worldwide, perpetual, irrevocable, royalty-free basis to BMJ Publishing Group Ltd ("BMJ") its licensees and where the relevant Journal is co-owned by BMJ to the co-owners of the Journal, to publish the Work in this journal and any other BMJ products and to exploit all rights, as set out in our [licence](#).

The Submitting Author accepts and understands that any supply made under these terms is made by BMJ to the Submitting Author unless you are acting as an employee on behalf of your employer or a postgraduate student of an affiliated institution which is paying any applicable article publishing charge ("APC") for Open Access articles. Where the Submitting Author wishes to make the Work available on an Open Access basis (and intends to pay the relevant APC), the terms of reuse of such Open Access shall be governed by a Creative Commons licence – details of these licences and which [Creative Commons](#) licence will apply to this Work are set out in our licence referred to above.

Other than as permitted in any relevant BMJ Author's Self Archiving Policies, I confirm this Work has not been accepted for publication elsewhere, is not being considered for publication elsewhere and does not duplicate material already published. I confirm all authors consent to publication of this Work and authorise the granting of this licence.

1  
2  
3  
4  
5  
6  
7  
8  
9  
10  
11  
12  
13  
14  
15  
16  
17  
18  
19  
20  
21  
22  
23  
24  
25  
26  
27  
28  
29  
30  
31  
32  
33  
34  
35  
36  
37  
38  
39  
40  
41  
42  
43  
44  
45  
46  
47  
48  
49  
50  
51  
52  
53  
54  
55  
56  
57  
58  
59  
60

May 12, 2021

**Public Acceptance of COVID-19 Vaccines: Cross-National  
Evidence on Levels and Individual-Level Predictors Using  
Observational Data**

Marie Fly Lindholt<sup>1</sup>

Frederik Jørgensen<sup>1</sup>

Alexander Bor<sup>1</sup>

& Michael Bang Petersen<sup>1\*</sup>

<sup>1</sup>Department of Political Science, Aarhus University

\*Corresponding author: michael@ps.au.dk

## Abstract

### **Objectives**

*The management of the COVID-19 pandemic hinges on the approval of safe and effective vaccines but, equally importantly, on high vaccine acceptance among people. To facilitate vaccination acceptance via effective health communication, it is key to understand levels of vaccine skepticism and the demographic, psychological and political predictors. To this end, we examine the levels and predictors of acceptance of an approved COVID-19 vaccine.*

### **Design, setting and participants**

*We examine the levels and predictors of acceptance of an approved COVID-19 vaccine in large online surveys from eight Western democracies that differ in terms of the severity of the pandemic and their response: Denmark, France, Germany, Hungary, Sweden, Italy, United Kingdom, and United States (total N = 18,231). Survey respondents were quota sampled to match the population margins on age, gender, and geographic location for each country. The study was conducted from September 2020 to February 2021, allowing us to assess changes in acceptance and predictors as COVID-19 vaccine programs were rolled out.*

### **Outcome measure**

*The outcome of the study is self-reported acceptance of a COVID-19 vaccine approved and recommended by health authorities.*

### **Results**

*The data reveal large variations in vaccine acceptance that ranges from 82 % in Denmark to 52 % in Hungary. Lack of vaccine acceptance is associated with lack of trust in authorities and scientists, conspiratorial thinking, and a lack of concern about COVID-19.*

### **Conclusion**

*Most national levels of vaccine acceptance fall below estimates of the required threshold for herd immunity. The results emphasize the long-term importance of building trust in preparations for health emergencies such as the current pandemic. For health communication, the results emphasize the importance of focusing on personal consequences of infections and debunking of myths to guide communication strategies.*

## Article Summary

### Strengths and limitations of this study

- Large samples that are reflective of the populations of eight different countries, allowing us to examine the generalizability of findings and the factors underlying cross-national differences.
- A broad-based assessment of potential correlates of vaccine acceptance, including both demographics, political, and COVID-specific factors.
- Analyses that includes observations both pre- and post-approval of COVID-19 vaccines.
- Observational data which limits causal traction.
- Self-reported vaccine acceptance can be subject to social desirability bias, and does not necessarily translate into actual vaccination rates.

Acknowledgements: We are grateful for research assistance from Magnus Storm Rasmussen.

Funding statement: This work was supported by The Carlsberg Foundation grant number CF20-0044 to Michael Bang Petersen. The funders had no role in the conduct of this research.

Ethical statement: The study complies with Aarhus University's Code of Conduct as well as the Committee Act of the Danish National Committee of Health Research Ethics, which states that "Surveys using questionnaires and interviews that do not involve human biological material (section 14(2) of the Committee Act)" are exempted from approval (<https://en.nvk.dk/how-to-notify/what-to-notify>)

Competing interests: None.

Author Contributions: MFL, FJ, AB and MBP designed the study and collected data. MFL and FJ analyzed data. MFL, FJ, AB and MBP wrote the paper.

Data sharing statement: Upon publication data will be publicly available at a repository at Open Science Framework.

Word count: 5,049.

## Background

A vaccine against COVID-19 is a “vital tool” in the management of the current pandemic.[1] Accordingly, extraordinary resources have been invested into vaccine development with unprecedented speed. Yet, even as approved vaccines become available, societies across the world still face another challenge: Vaccine skepticism.

As of late 2020, researchers estimated that up to 82 percent of a country’s population may need to be vaccinated in order to reach herd immunity against SARS-CoV-2,[2-3] and the emergence of new virus variants implies that individuals may need to get vaccinated repeatedly. However, general vaccine hesitancy has been on the rise in recent years in many countries.[4-5] This has been the case for many non-COVID-19 vaccine programs, and is likely to pose a challenge for COVID-19 vaccines.[6-7] Consistent with this, initial cross-national survey evidence suggests that substantially fewer people worldwide are willing to get vaccinated than would be necessary; and that some countries – e.g. Russia, Poland and France – face strikingly high levels of skepticism.[8] Thus, a key challenge for pandemic management is for health authorities across the world to encourage people to accept approved COVID-19 vaccines through careful approval procedures and effective health communication. This latter challenge emphasizes the importance of understanding why people are hesitant about taking vaccines. Such knowledge is crucial for guiding communication in a way that increase vaccine acceptance and for understanding how to prepare for future health emergencies.

In this manuscript, we *first* present descriptive analyses of the acceptance of a COVID-19 vaccine approved and recommended by health authorities across eight Western democracies. *Second*, we investigate individual-level predictors of vaccine acceptance. *Third*, we also explore macro-level correlations of vaccine acceptance. The study was conducted from the fall of 2020 to the winter of 2021. This data collection thus allows us to track levels and predictors of vaccine acceptance as vaccines were approved using large-scale cross-national surveys including a broad set of potential predictors, including political predictors, which are less-often explored in traditional health research. Given the scale and broad impact of a pandemic crisis, however, such broader predictors may be particularly relevant to explore.

## Potential predictors: Who are expected to accept a COVID-19 vaccine?

To organize our expectations about the individual-level predictors of vaccine acceptance during the COVID-19 pandemic, we draw on one of the most comprehensive frameworks for understanding the antecedents of vaccine acceptance; the 5C model from Betsch et al. (2018).[9] According to the 5C model, five psychological antecedents drive vaccine acceptance: *confidence, constraints, complacency, calculation and collective responsibility*. While we consider multiple predictors that are often not considered within this model, we strengthen the model's coverage by theorizing the link between the components of the model and the novel predictors that may be important for vaccine acceptance during the COVID-19 pandemic.

*Confidence* is defined as trust in (i) the effectiveness and safety of vaccines, (ii) the system that delivers them, and (iii) the motivation of policy-makers who decide on the need of vaccines.[9-10] Here, we consider two categories of predictors that reflect the underlying dimensions of confidence. First, we broadly tap into the second dimension of the definition by focusing on trust in a range of actors. Second, we investigate a range of disease-specific attitudes that broadly reflect the third dimension of the definition.

Empirically, trust is a crucial predictor of vaccine acceptance. Guay et al. (2019), for example, found that distrust in public health authorities is associated with general vaccine hesitancy.[11] Similarly, people who trust official authorities, were more likely to accept the HPV vaccine.[12] Initial work on COVID-19 vaccines also demonstrates that those who have higher trust in scientists are more willing to get vaccinated.[13]

Furthermore, the literature on vaccine hesitancy has found that hesitancy is integrated into a broader set of political attitudes and perceptions. Political ideology has been found to be related to vaccine hesitancy as conservative individuals are less likely to trust authorities.[14] Furthermore, it is a standard finding in political science that individuals are less likely to accept decisions from other political parties than they one they identify with or vote for.[15] Thus, it is plausible that people who have voted for the government party/candidate are more likely to accept a vaccine, since the vaccine program is a part of the governments' response to the pandemic. In addition to these standard political attitudes, more extreme attitudes may also influence confidence in vaccines. Most prominently, people prone to conspiracy thinking are more likely to be hesitant about vaccines.[16-17] In the current context, higher levels of

1  
2  
3 coronavirus conspiracy thinking have also been found to be associated with lower acceptance  
4 of future vaccines against COVID-19.[18, 19, although see 20] Consequently, it can be  
5 expected that the COVID-19 pandemic may elicit anti-systemic sentiments. We examine three  
6 levels of anti-systemic sentiments and how they relate to vaccine acceptance, including (1)  
7 concern for democratic rights, (2) support of public protests against government policies, and  
8 (3) beliefs in specific conspiracy theories related to COVID-19. Finally, we also examine the  
9 role of awareness of misinformation. From the literature, we know that susceptibility to  
10 misinformation negatively affects people's acceptance of a vaccine against COVID-19.[21]  
11 However, studies have also shown that pre-bunking can help cultivate "mental antibodies"  
12 against misinformation.[22-23] Thus, it is likely that awareness of misinformation is positively  
13 associated with vaccine acceptance.  
14  
15  
16  
17  
18  
19  
20  
21  
22

23 *Constraints* refer to the structural and psychological barriers, impeding the implementation of  
24 vaccination intentions into behavior.[9] We consider the feeling of "pandemic fatigue" as such  
25 a barrier and thus a potential correlate of vaccine acceptance. While the WHO has been warning  
26 about fatigue among populations in the fall of 2020,[24-25] it is plausible that people who feel  
27 fatigued are willing to do what it takes to end the pandemic including being vaccinated.  
28 However, perhaps paradoxically, fatigue could also generate an unwillingness or incapability  
29 to comply with further requirements including vaccinations. Furthermore, we include the sense  
30 of having sufficient knowledge about behavioral recommendations as another psychological  
31 barrier. A sense of self-efficacy about proper behavior was one of the best predictors of  
32 compliance with physical distancing policies during the first wave of the pandemic.[26]  
33 Furthermore, perceived insufficient knowledge is significantly associated with general vaccine  
34 hesitancy.[11] Finally, we assess remaining psychological constraints by assessing to what  
35 extent people report being able to change their behavior in accordance with the  
36 recommendations from the health authorities during the pandemic. This general measure of  
37 behavior change should serve as a proxy for the range of constraints that may serve as a barrier  
38 for action over and beyond the directly assessed factors.  
39  
40  
41  
42  
43  
44  
45  
46  
47  
48  
49  
50

51 *Complacency* "exists where perceived risks of vaccine-preventable diseases are low and  
52 vaccination is not deemed a necessary preventive action".[9-10] Here we consider two types  
53 of predictors, including demographic factors and corona-specific risk-perceptions.  
54  
55  
56  
57

58 First, a set of demographic predictors are expected to be associated with complacency. Thus,  
59 prior studies have found that males are more likely than females to accept a potential COVID-  
60



1  
2  
3 19 vaccine [27-29], potentially due to sex-based differences in COVID-19 mortality.[27]  
4 Likewise older people are expected to be more willing to take a vaccination due to higher risks  
5 of severe infections. This is supported by Lazarus et al. (2020)[8] and Hacquin et al. (2020)[29],  
6 while neither Dror et al. (2020)[27] nor Wong et al. (2020)[28] found any age differences in  
7 vaccine acceptance. As a final demographic variable, we also consider education, even though  
8 this variable may influence vaccine acceptance through other dimensions than complacency  
9 (e.g., confidence). The findings of prior studies on vaccine hesitancy are mixed with regards  
10 to education, indicating that that the association between education and vaccine hesitancy is  
11 context specific.[30] To illustrate, whereas Guay et al. (2019) find that lower education is  
12 associated with general vaccine hesitancy in Canada,[11] Wagner et al. (2019) find that  
13 educational level is *not* associated with general vaccine hesitancy across five low-middle and  
14 middle-income countries.[30] Similarly, Bertonecello et al. (2020) find that while low parent  
15 education is significantly associated with general vaccine hesitancy, it is *not* associated with  
16 hesitancy in the context of child vaccine programs in Italy.[31] In the context of COVID-19,  
17 studies have found that higher education is associated with higher levels of vaccine  
18 acceptance.[8, 29]

19  
20  
21  
22  
23  
24  
25  
26  
27  
28  
29  
30  
31  
32 Second, we also investigate the role of personal risk-perceptions. Several studies have found  
33 that self-perceived risks of COVID-19 positively predicts acceptance of potential COVID-19  
34 vaccines.[19, 27, 29] Likewise, Wong et al. (2020) argued that perceived susceptibility to  
35 infection predicted the intention to take a future COVID-19 vaccine.[28] Thus, we expect that  
36 personal risk-perception predicts vaccine acceptance.

37  
38  
39  
40  
41  
42  
43  
44  
45  
46  
47  
48  
49  
50  
51  
52  
53  
54  
55  
56  
57  
58  
59  
60  
*Collective responsibility* is defined as the willingness to protect others by one's own  
vaccination by means of herd immunity.[9, 32] We consider three groups of predictors to be  
relevant for this category of vaccine antecedents: (1) prosocial concern (i.e., concern for  
others), (2) support for pandemic restrictions, and (3) interpersonal trust.

Focusing *first* on prosocial concerns, we measure a range of concerns over the disease's impact  
on society, including hospitals' ability to help the sick, society's ability to help the disadvantaged,  
social unrest and crime, and the country's economy. These concerns clearly tap into the collective  
responsibility and can be expected to positively predict vaccine acceptance given that vaccine  
uptake can be viewed as a form of other directed behavior that protects individuals beyond the  
self.

1  
2  
3 Second, we examine the association between compliance during the COVID-19 pandemic and  
4 vaccine acceptance. Protective behavior thus might be viewed as a collective good, implying  
5 that compliance with health advice might reflect the willingness to protect others rather than  
6 being individually rational to protect oneself.[33] Here, we specifically investigate support for  
7 non-pharmaceutical interventions, i.e., government restrictions to stop infection spread as a  
8 direct measure of the acceptance of collective responsibility.  
9

10  
11  
12  
13  
14 Third, interpersonal trust may be a key predictor of the willingness to contribute to collective  
15 action during the COVID-19 pandemic.[33] Vaccinations is a form of collective action, where  
16 herd immunity is produced via the collective participation in vaccination programs,[34] and  
17 people may be more likely to participate if they trust others to do the same.  
18  
19  
20

21  
22 Table 1 in the measurement section, shows the specific operationalization of each of these  
23 predictors and summarizes how these predictors are related to the 5C model. As is evident, we  
24 do not include measures that reflect the *calculation* component of the 5C model. From a  
25 communication perspective, however, this component is less important as it refers not to the  
26 content of the individual's considerations but to more stable individual differences in decision-  
27 making style (i.e., extensive cost-benefit analyses of pros and cons of vaccination and  
28 infection).[9]  
29  
30  
31  
32  
33  
34  
35  
36  
37

## 38 **Methods**

39  
40  
41 **Patient and public involvement.** Patients and/or the public were not involved in the design,  
42 or conduct, or reporting, or dissemination plans of this research.  
43  
44

45  
46 **Data.** We fielded quota-sampled surveys in eight countries from September 13, 2020 until  
47 February 16, 2021: Denmark, Sweden, the United Kingdom, the United States of America,  
48 Italy, France, Germany and Hungary (please see Table A1 in the Online Appendix (OA) for an  
49 overview of the data collection). These countries were chosen to represent a diversity of  
50 national responses to the COVID-19 pandemic as well as a diversity in the severity of the local  
51 epidemic. The period consists of eight data rounds in Denmark and seven data rounds in the  
52 remaining countries with approximately 500 respondents per data round. In each of the eight  
53 countries, the survey company Epinion sampled adult respondents using online panels. Among  
54 the panelists invited to take our survey, the response rate across the countries in our sample  
55  
56  
57  
58  
59  
60

was between 18 % (Hungary) and 64 % (the United States). The survey was conducted in accordance with the guidelines of the Danish National Committee of Health Research Ethics for survey research that do not involve human biological material. Survey respondents were quota sampled to match the population margins on age, gender, and geographic location for each of the eight countries. We address imbalances by post-stratifying our sample data to match the demographic margins from the population. All statistical analyses presented in the manuscript employ these post-stratification weights.

### Measures

All measures are self-reported from participant questionnaires. The key measures are vaccine acceptance, trust in relevant authorities and groups, disease-specific risk-perceptions, disease-specific attitudes, and propensities to engage in protective behavior. Table 1 provides an overview of question wordings and scales for these measures.

**Table 1:** Main measures in the study

|                           | Questions                                                                                                                                                                                                                     | Values                                                                                                                      |
|---------------------------|-------------------------------------------------------------------------------------------------------------------------------------------------------------------------------------------------------------------------------|-----------------------------------------------------------------------------------------------------------------------------|
| <b>Vaccine acceptance</b> | If the health authorities advise people like me to get an approved vaccine against the coronavirus, I will follow their advice.                                                                                               | 1. Completely disagree<br>2. Somewhat disagree<br>3. Neither agree nor disagree<br>4. Somewhat agree<br>5. Completely agree |
| <b>Confidence</b>         | <i>Trust in health authorities and scientists</i><br><br>How much trust do you have in the following institutions regarding the coronavirus crisis?<br><br>1) The national health authorities<br><br>2) Scientists            | 1. Not at all<br>2. To a lesser degree<br>3. To a certain degree<br>4. To a high degree                                     |
|                           | <i>Trust in the government</i><br><br>Give your assessment on a scale from 0 to 10, where 0 indicates that you have no confidence in the government at all, and 10 indicates that you have full confidence in the government. | 0. No confidence at all<br>1.<br>2.<br>3.<br>4.<br>5.<br>6.                                                                 |

|                    |                                                                                                                                                                                                                                                                                                                                                                                                                                                                                                                                |                                                                                                                                                    |
|--------------------|--------------------------------------------------------------------------------------------------------------------------------------------------------------------------------------------------------------------------------------------------------------------------------------------------------------------------------------------------------------------------------------------------------------------------------------------------------------------------------------------------------------------------------|----------------------------------------------------------------------------------------------------------------------------------------------------|
|                    |                                                                                                                                                                                                                                                                                                                                                                                                                                                                                                                                | 7.<br>8.<br>9.<br>10. Full confidence                                                                                                              |
|                    | <p><i>Attitudes</i></p> <p>To what extent do you agree with the following statements?</p> <p>(1) I'm concerned about my democratic rights in the current circumstances</p> <p>(2) I support the public protests against the government's policies during the COVID-19 pandemic</p> <p>(3) I believe the government is hiding important information from the public about the coronavirus and its cures</p> <p>(4) I have heard or read information about the coronavirus and its cures, which I believe was probably false</p> | <p>1. Completely disagree</p> <p>2. Somewhat disagree</p> <p>3. Neither agree nor disagree</p> <p>4. Somewhat agree</p> <p>5. Completely agree</p> |
|                    | <p><i>Vote choice</i></p> <p>What party/who did you vote for in the last general election/presidential election? [date for last election]</p>                                                                                                                                                                                                                                                                                                                                                                                  | [country-specific party/candidate categories]                                                                                                      |
|                    | <p><i>Ideology</i></p> <p>In political matters, people talk of 'the left' and 'the right'. How would you place your views on this scale, generally speaking?</p>                                                                                                                                                                                                                                                                                                                                                               | <p>1. The left</p> <p>2.</p> <p>3.</p> <p>4.</p> <p>5.</p> <p>6.</p> <p>7.</p> <p>8.</p> <p>9.</p> <p>10. The right</p>                            |
| <b>Constraints</b> | <p><i>Fatigue</i></p> <p>To what extent do you agree with the following statements?</p> <p>I do not think I can keep up with the restrictions against the coronavirus for much longer.</p>                                                                                                                                                                                                                                                                                                                                     | <p>1. Completely disagree</p> <p>2. Somewhat disagree</p> <p>3. Neither agree nor disagree</p> <p>4. Somewhat agree</p> <p>5. Completely agree</p> |
|                    | <p><i>Behavior change</i></p> <p>To what degree do you feel that the current situation with the coronavirus has made you change your behavior to avoid spreading infection?</p>                                                                                                                                                                                                                                                                                                                                                | <p>1. Not at all</p> <p>2. To a lesser degree</p> <p>3. To a certain degree</p> <p>4. To a high degree</p>                                         |
|                    | <p><i>Knowledge</i></p>                                                                                                                                                                                                                                                                                                                                                                                                                                                                                                        | <p>1. Not at all</p> <p>2. To a lesser degree</p> <p>3. To a certain degree</p> <p>4. To a high degree</p>                                         |

|                                  |                                                                                                                                                                                                                                                                                                                                                                                                                                                                                                                                              |                                                                                         |
|----------------------------------|----------------------------------------------------------------------------------------------------------------------------------------------------------------------------------------------------------------------------------------------------------------------------------------------------------------------------------------------------------------------------------------------------------------------------------------------------------------------------------------------------------------------------------------------|-----------------------------------------------------------------------------------------|
|                                  | To what degree do you feel that you know enough about what you as a citizen should do in relation to the coronavirus?                                                                                                                                                                                                                                                                                                                                                                                                                        |                                                                                         |
| <b>Complacency</b> <sup>1</sup>  | <i>Sex</i><br>Are you?                                                                                                                                                                                                                                                                                                                                                                                                                                                                                                                       | 1. Male<br>2. Female                                                                    |
|                                  | <i>Age</i><br>What is your age?                                                                                                                                                                                                                                                                                                                                                                                                                                                                                                              | [open textbox]                                                                          |
|                                  | <i>Education</i><br>What is your highest level of completed education?                                                                                                                                                                                                                                                                                                                                                                                                                                                                       | [country-specific education categories]                                                 |
|                                  | <i>Personal risk-perceptions</i><br>To what degree are you concerned about the consequences of the corona-virus for you and your family?                                                                                                                                                                                                                                                                                                                                                                                                     | 1. Not at all<br>2. To a lesser degree<br>3. To a certain degree<br>4. To a high degree |
| <b>Collective responsibility</b> | <i>Prosocial concerns</i><br>To what degree are you concerned about the consequences of the corona-virus...<br><br>(1) ... for hospitals' ability to help the sick?<br><br>(2) ... for society's ability to help the disadvantaged?<br><br>(3) ... on social unrest and crime?<br><br>(4) ... on the country's economy?''.                                                                                                                                                                                                                   | 1. Not at all<br>2. To a lesser degree<br>3. To a certain degree<br>4. To a high degree |
|                                  | <i>Support for restrictions</i><br>As you may know, many countries have implemented various measures to stop the spread of the COVID-19 epidemic. We are interested in whether you support or oppose the following measures in your country:<br><br>(1) Closing of schools and universities<br><br>(2) Closing (or work from home) for all-but-essential workplaces (e.g. grocery shops, doctors)<br><br>(3) Cancelling public events<br><br>(4) Cancelling private gatherings with over 100 people<br><br>(5) Closing public transportation | 1. Oppose<br>2. Support                                                                 |

<sup>1</sup> See text for discussion of the relationship between demographic variables and complacency (p. 5-6).

|  |                                                                                                                                                                                                                                                                                                |                                                                                                                                                                        |
|--|------------------------------------------------------------------------------------------------------------------------------------------------------------------------------------------------------------------------------------------------------------------------------------------------|------------------------------------------------------------------------------------------------------------------------------------------------------------------------|
|  | <p>(6) Ordering people to shelter-in-place (not leaving house with minimal exceptions)</p> <p>(7) Restricting internal movement between cities/regions</p> <p>(8) Ordering people to wear face masks in public places</p> <p>(9) Banning arrivals for foreign travelers from some regions.</p> |                                                                                                                                                                        |
|  | <p><i>Interpersonal trust</i><br/>Do you think that most people by and large are to be trusted, or that you cannot be too careful when it comes to other people?</p>                                                                                                                           | <p>0. You cannot be too careful</p> <p>1.</p> <p>2.</p> <p>3.</p> <p>4.</p> <p>5.</p> <p>6.</p> <p>7.</p> <p>8.</p> <p>9.</p> <p>10. Most people are to be trusted</p> |

Notes: Mean and standard deviation of all measures is available in table A2 in the OA.

### *Vaccine acceptance*

Our outcome, vaccine acceptance, is measured using the following question: “If the health authorities advise people like me to get an approved vaccine against the coronavirus, I will follow their advice”. Thus, our measure is framed as an approved vaccine that is recommended by the national health authorities. This choice reflects that (1) we focus on COVID-19 vaccines specifically, (2) during a global health crisis, where health authorities are emergency approving and very actively encouraging people to take up new vaccines. Some of these important factors are overlooked by previous validated vaccine acceptance measures developed pre-pandemic for measuring attitudes towards vaccines in general. Framing the question in the context of the national health authorities may, however, yield different results than if a standardised and validated measure of vaccine acceptance was used. Furthermore, this choice makes it difficult to compare our results with other studies of vaccine acceptance.[9] Although Betsch et al. (2018) recommend to use a general scale, they also acknowledge that this might not be useful when the focus of a study is on a specific vaccine.[9]

Our outcome, vaccine acceptance, is a continuous variable rescaled to range from 0-1, with higher values indicating higher levels of acceptance of a future COVID-19 vaccine.

### *Predictors of vaccine acceptance*

All measures of trust, concern and disease-specific attitudes are treated as continuous variables and rescaled from 0-1, with higher values indicating higher levels of trust, concern and agreement with the disease-specific statements. For our compliance measures, behavior change and knowledge are treated as continuous variables and rescaled to range from 0-1, with higher values indicating higher levels of behavior change and knowledge. Furthermore, we create an index of support for restrictions by adding together the nine measures of support for restrictions. The index is scaled from 0-1, with higher values indicating higher levels of support for restrictions. “Do not know” answers are classified as missing and are not included in the analysis. Sex is an indicator variable (0 for males; 1 for females). Age is a continuous variable rescaled from 0-1 with 0 being the minimum age in the sample (18 years) and 1 being the maximum age (99 years). Education is an indicator variable based on the internationally comparable ISCED-scale (0 for non-tertiary education; 1 for tertiary education). Vote choice is an indicator variable (0 for opposition; 1 for government) (see table A3 in the OA for the coding of this variable). Finally, political ideology is a continuous variable rescaled to range from 0 to 1, with 1 indicating the ideological standpoint to the utmost right.

To ease the interpretation of the results, both the outcome and all predictors are scaled from 0-1 in the analyses below. Table A2 in the appendix reports the descriptive statistics for all the above correlates in our overall sample. Moreover, Figure A1 in the appendix shows an overview of all bivariate correlations.

### *Statistical analyses*

Since our dependent variable, vaccine acceptance, is continuous, we use OLS regression models to investigate the individual-level predictors of vaccine acceptance. In the results section we present two models: (I) a model with all the bivariate correlations of vaccine acceptance, (II) a full model that includes all predictors described above. Model II includes country dummies to control for country specific effects. Thus, our aim is to identify individual-level predictors of acceptance of a COVID-19 vaccine. To account for the fact that individuals are nested within countries, we cluster the standard errors at the country level.

In the OA we conduct a range of sensitivity analyses that probe the robustness of our benchmark results. First, we replicate the main analyses while treating the 4-point scale

1  
2  
3 measures of trust, concern, behavior change and knowledge as categorical variables instead of  
4 continuous (see Figure A2-A5 in the OA). Second, we similarly replicate the analyses while  
5 using a dichotomous - rather than the continuous - coding of the outcome<sup>2</sup> (see Figure A6 in  
6 the OA). Third, the present results reflect the analysis period between September 13, 2020 and  
7 February 16, 2021. Thus, we include data both pre- and post-approval of the COVID-19  
8 vaccines. In the OA, we compare the results before and after COVID-19 vaccines were  
9 approved (see Figure A7 in the OA). Fourth, in some contexts - most notably the countries with  
10 federal states (the US and Germany) in our sample - much of the COVID-19 response is done  
11 on a regional level. To account for state-specific heterogeneity, we analyze the individual-level  
12 predictors separately in Germany and the US, while controlling for state rather than country  
13 level dummies (see Figure A8-A10 in the OA). The results are essentially similar to those  
14 presented in the main text.  
15  
16  
17  
18  
19  
20  
21  
22  
23  
24  
25  
26  
27

## 28 Results

29 Figure 1 shows the development in vaccine acceptance, by country. For the descriptive analyses  
30 below, we refer to the percentage who accept the vaccine (i.e. share of respondents who  
31 answered “Somewhat agree” or “Completely agree” to whether they will follow the advice of  
32 the health authorities and get an approved vaccine). This percentage refers to the level of  
33 vaccine acceptance for the full analysis period, i.e. September 2020 - February 2021.  
34  
35  
36  
37  
38  
39  
40  
41  
42  
43  
44  
45

[Figure 1 about here]

46 Across the eight countries, we observe large differences in the level of vaccine acceptance.  
47 Specifically, we observe the highest level of vaccine acceptance in Denmark (82 %).  
48 Furthermore, we observe a high level of vaccine acceptance in the United Kingdom (76 %).  
49 However, we observe only moderate levels of vaccine acceptance in Sweden (67 %), Germany  
50 (66 %), Italy (66 %), and the United States (61 %). The lowest levels of vaccine acceptance is  
51 observed in France (55 %) and Hungary (52 %). However, it is worth noticing that in most of  
52  
53  
54  
55  
56  
57  
58

---

59 <sup>2</sup> For the dichotomous outcome measure, respondents who answered “Somewhat agree” or “Completely agree”  
60 are coded as 1, indicating vaccine acceptance.



1  
2  
3 the countries, we observe increasing levels of vaccine acceptance over the course of the  
4 pandemic as COVID-19 vaccines are being approved and rolled out.  
5  
6

7 The results indicate that vaccine skepticism is present in most of the countries in our sample.  
8 These results underscore two important points. First, the presence of vaccine skepticism  
9 demonstrates the importance of understanding the individual-level variation of vaccine  
10 acceptance in order to understand the targets of health communication. Second, the large  
11 variation across countries emphasizes the need of a more thorough understanding of the  
12 importance of national context. Therefore, we also move beyond the individual-level focus to  
13 explore macro-level correlations of vaccine acceptance.  
14  
15  
16  
17  
18  
19

20 On this basis, we first turn towards understanding the individual-level predictors of acceptance  
21 of a COVID-19 vaccine. Figure 2 presents the results of the analyses (see Table A4 in the OA).  
22 In the discussions of results below, we specifically focus on the estimated correlations from  
23 model II in table A4 (the full model). The size of the estimated coefficients reported below  
24 reflects the difference in vaccine acceptance when we compare individuals at the minimum and  
25 maximum values, respectively, for each of the correlates.  
26  
27  
28  
29  
30  
31  
32  
33  
34

35 [Figure 2 about here]  
36  
37  
38

39 Examining the *confidence* predictors, we observe that trust in the health authorities and trust in  
40 scientists are the strongest predictors of vaccine acceptance. Respondents who have the highest  
41 level of trust in the national health authorities have 17 (95% CI 14-20) percentage points higher  
42 acceptance of a COVID-19 vaccine compared to those with the least trust. The same pattern is  
43 observed for trust in scientists. Respondents with the highest level of trust have 21 (95% CI  
44 16-26) percentage points higher acceptance of an approved COVID-19 vaccine compared to  
45 those with the lowest trust level. Furthermore, trust in the government is also significantly  
46 positively predicting vaccine acceptance. Respondents high in government trust have 5 (95%  
47 CI 0-10) percentage points higher acceptance of an approved COVID-19 vaccine compared to  
48 those with the lowest level of trust. Focusing on the attitudinal aspect of *confidence* predictors,  
49 we observe that conspiracy beliefs significantly negatively predict vaccine acceptance, while  
50 awareness of misinformation significantly positively predicts vaccine acceptance. Specifically,  
51 respondents who score highest in thinking that the government is hiding information about the  
52  
53  
54  
55  
56  
57  
58  
59  
60

1  
2  
3 coronavirus and its cures (conspiracy beliefs), have 9 (95% CI 5-12) percentage points higher  
4 acceptance of an approved COVID-19 vaccine compared with those who do not subscribe to  
5 conspiracies. Respondents who think that they have been exposed to misinformation have 4  
6 (95% CI 1-7) percentage points higher acceptance of an approved COVID-19 vaccine. Both  
7 concern about democratic rights and support for protests are negatively, but not significantly,  
8 associated with vaccine acceptance. Finally, neither political ideology nor vote choice are  
9 significantly associated with vaccine acceptance.

10  
11  
12 Moving to the *constraints* predictors, we observe that behavior change is a significant positive  
13 predictor of vaccine acceptance. Specifically, respondents who have changed their behavior  
14 the most to avoid spreading infection have 11 (95% CI 7-14) percentage points higher  
15 acceptance of an approved COVID-19 vaccine compared to respondents who have changed  
16 their behavior the least. Neither fatigue nor knowledge are significant predictors of vaccine  
17 acceptance.

18  
19  
20 Focusing on the *complacency* predictors, we observe that being male, older, and having tertiary  
21 education is associated with higher vaccine acceptance. Specifically, females have 5 (95% CI  
22 3-7) percentage points lower acceptance of an approved vaccine compared to males. Age  
23 positively predicts vaccine acceptance: When comparing respondents at the minimum and  
24 maximum level of age in the sample (18-99 years), the difference is 19 (95% CI 12-26)  
25 percentage points. Furthermore, respondents with tertiary education have 2 (95% CI 1-3)  
26 percentage points higher acceptance of an approved COVID-19 vaccine compared to  
27 respondents with non-tertiary education. Finally, personal risk-perception is also a positive  
28 predictor of vaccine acceptance. The respondents who are the most concerned about the  
29 consequences of the corona crisis for themselves and their families have 9 (95% CI 3-14)  
30 percentage points higher acceptance of an approved COVID-19 vaccine compared to the least  
31 concerned.

32  
33  
34 Finally, looking at the *collective responsibility* predictors, the strongest predictors of vaccine  
35 acceptance is support for restrictions. Specifically, respondents who are most supportive of  
36 restrictions have 13 (95% CI 9-17) percentage points higher acceptance of an approved vaccine  
37 compared to respondents who are the least supportive of restrictions. Furthermore,  
38 interpersonal trust positively predicts vaccine acceptance. Respondents with the highest level  
39 of interpersonal trust have 6 (95% CI 3-9) percentage points higher acceptance of an approved  
40 COVID-19 vaccine compared to respondents with the lowest interpersonal trust level. Concern  
41  
42  
43  
44  
45  
46  
47  
48  
49  
50  
51  
52  
53  
54  
55  
56  
57  
58  
59  
60

1  
2  
3 for the capacity of hospitals is also a positive predictor of vaccine acceptance. Comparing those  
4 who are the most concerned for the capacity of hospitals to those who are the least concerned  
5 shows a 5 (95% CI 2-8) percentage points increase in vaccine acceptance. Additionally,  
6 concern for social unrest and crime negatively predicts vaccine acceptance. Comparing those  
7 who are the most concerned for social unrest and crime to those who are the least concerned  
8 shows a 3 (95% CI 1-5) percentage points decrease in vaccine acceptance. Finally, neither  
9 concern for the society's ability to help the disadvantaged nor concern for the country's  
10 economy are significantly associated with vaccine acceptance.  
11  
12  
13  
14  
15  
16  
17

18 The relationship between the predictors and vaccine acceptance is essentially the same across  
19 the bivariate and the full model. However, ideology changes from being significant and  
20 negative in the bivariate model to insignificant and positive in the full model. Furthermore,  
21 concern for the society's ability to help the disadvantaged changes from being significant and  
22 positive in the bivariate model to insignificant and negative in the full model. Overall, the  
23 empirical patterns are relatively stable across countries, but we do observe some notable cross-  
24 country differences with respect to specific predictors (see Figure A11 and A12 in the OA). In  
25 Denmark, neither trust in scientists nor personal risk-perceptions are significant predictors of  
26 vaccine acceptance (see Figure A11 in the OA). Focusing on heterogeneity across individual-  
27 level demographic subgroups, we see that results are essentially homogenous across sex, age  
28 and educational level (see Figures A13-A15 in the OA). Even though the levels of vaccine  
29 acceptance has changed over the course of the pandemic, the results of the individual-level  
30 predictors of vaccine acceptance are essentially the same when results pre- and post-approval  
31 of COVID-19 vaccines are compared (see Figure A7 in the OA).  
32  
33  
34  
35  
36  
37  
38  
39  
40  
41  
42

43 While trust in the national health authorities and scientists are the most prominent factors  
44 together with personal risk-perceptions when everything is assessed individually, the data also  
45 shows that vaccine skepticism during the pandemic is interwoven into a larger web of attitudes  
46 and behaviors related to anti-systemic sentiments. Hence, in addition to trust in health  
47 authorities, a lack of vaccine acceptance was also related to endorsement of conspiracy beliefs,  
48 support for other non-pharmaceutical interventions, and a lack of compliance with advice about  
49 changing behavior to avoid spreading infections.  
50  
51  
52  
53  
54  
55  
56  
57  
58  
59  
60

1  
2  
3 As a final explorative analysis, we therefore assess whether the highlighted factors also help  
4 explain the cross-national variation in vaccine acceptance. To this end, we examine the  
5 correlations between vaccine acceptance at the national level and each of the different  
6 independent measures aggregated for each country. All of these correlations are available in  
7 Figure A16 in the OA. In Figure 3, we present the correlations for key variables highlighted  
8 above: Trust in health authorities, personal risk-perceptions, conspiracy beliefs and behavior  
9 change. While the analysis is highly limited by the fact that it only includes eight national cases,  
10 it is nonetheless strikingly informative. While differences in personal risk-perceptions are not  
11 strongly related to cross-national differences, country averages in the anti-systemic measures,  
12 especially (lack of) trust in health authorities, are exceptionally closely related to country  
13 averages in vaccine acceptance. Thus, trust in health authorities does not just explain  
14 differences in vaccine acceptance between individuals but also between countries.  
15  
16  
17  
18  
19  
20  
21  
22  
23

24  
25 [Figure 3 about here]  
26  
27  
28  
29

## 30 Discussion

31  
32 In this paper, we investigated (1) the level of vaccine acceptance of an approved COVID-19  
33 vaccine, (2) individual-level predictors of vaccine acceptance, and (3) macro-level correlations  
34 of vaccine acceptance. While levels of vaccine acceptance generally increased when COVID-  
35 19 vaccines were approved during the winter of 2020-2021, the results also demonstrate that  
36 for many of the countries in our sample, people are only moderately willing to receive a  
37 vaccine. This highlights the need for understanding the individual-level variation underlying  
38 vaccine skepticism and identifying potential targets for guiding health communication to  
39 increase vaccine acceptance.  
40  
41  
42  
43  
44  
45  
46

47 The analyses of individual-level predictors demonstrate that the key drivers of COVID-19  
48 vaccine acceptance are (1) trust in the national health authorities and scientists, and (2) personal  
49 health concerns. These results are consistent with findings of similar studies that emphasize  
50 that those who have more trust in experts and scientists are more willing to vaccinate.[13, 35]  
51 Likewise, several studies have also found personal risk-perception to be an important predictor  
52 of acceptance of a COVID-19 vaccine.[20, 27, 29, 36] Furthermore, Neumann-Böhme & Sabat  
53 (2020) find that the most frequently used reason for vaccination is to protect the respondents  
54 own and family members health.[37] Motta et al. (2020) also find that messages emphasizing  
55  
56  
57  
58  
59  
60

1  
2  
3 the personal risks at failing to vaccinate are effective in convincing people to plan to get  
4 vaccinated.[38] Thus, in the framework of the 5C Model from Betsch et al. (2020), skepticism  
5 towards a COVID-19 vaccine primarily results from *complacency* or a lack of *confidence*.[9]  
6  
7 Using these insights is essential to guide health communication in a way that can potentially  
8 increase vaccine acceptance.[39] Specifically, our findings suggest that efforts should be  
9 focused on motivating the complacent, i.e. those who lacks concerns about the personal  
10 consequences of the pandemic. This can be done through informational interventions to explain  
11 disease risks and stress the social benefits of vaccination.[39] When it comes to individuals  
12 with a lack of confidence, they usually possess a considerable amount of incorrect knowledge  
13 that distorts risk perceptions and undermines the general trust in vaccination.[39] Consistent  
14 with this, the present findings also highlight conspiracy beliefs as a key predictor of vaccine  
15 hesitancy. Following Betsch et al. (2015), this implies that interventions aiming at debunking  
16 myths is the key to increase vaccine acceptance among those who lack confidence.[39]  
17 However, strategies aiming at those who lack confidence are scarce, thus, focusing on  
18 motivating the complacent may be more effective.[39] Altogether, these results suggest that  
19 the most important communication targets are the consequences of infections for the self and  
20 close others and debunking of myths.  
21  
22  
23  
24  
25  
26  
27  
28  
29  
30  
31  
32

33 In sum, these analyses point to the significant challenges involved in convincing vaccine  
34 skeptics. The web of anti-systemic attitudes and distrust that vaccine skepticism is interwoven  
35 in makes it difficult to craft efficient health communication, as the effectiveness of  
36 communication is fundamentally contingent on the preceding existence of trust in its source.  
37 This challenge might be further deepened during the COVID-19 pandemic as research suggests  
38 that the stress of the pandemic and the restrictions itself fuels anti-systemic beliefs.[40] The  
39 results thus, first, emphasize the general importance of building trust prior to the onset of crises  
40 and of investing significant resources into maintaining trust as a crisis unfolds.[41] Second, for  
41 most short-term oriented communication purposes, the results suggest that the best  
42 communication targets are the consequences of infections for the self and close others and  
43 debunking of myths.  
44  
45  
46  
47  
48  
49  
50  
51  
52

53 The results should however be considered in the light of the following limitations. First, the  
54 results are based on observational data which limits causal traction. Second, we investigate  
55 self-reported vaccine acceptance, and thus, not actual vaccination behavior. Therefore, we  
56 cannot be sure that acceptance of the vaccine translates into actual vaccination rates, since self-  
57  
58  
59  
60

1  
2  
3 reported vaccine acceptance can be subject to social desirability bias. However, several studies  
4 have found a high level of consistency between self-reported vaccine acceptance and actual  
5 vaccination rates [42-44].  
6  
7  
8  
9  
10  
11

## 12 **Conclusion**

13  
14 The results demonstrate that vaccine skepticism is present in most of the countries in our  
15 sample, even after vaccines have been approved. Consistent with similar studies, the analyses  
16 of the individual-level predictors show that the key individual drivers of acceptance of an  
17 approved COVID-19 vaccine are (1) trust in the national health authorities and scientists, and  
18 (2) personal health concerns. The results suggest that an important communication target is the  
19 consequences of infections for the self and close others. Furthermore, these results emphasize  
20 that anything that erodes trust in health authorities and scientists are problematic for  
21 vaccination efforts, and thus, underscore the key importance of health and political authorities  
22 to strive to uphold trust to the maximum extent during the pandemic. This is not just crucial for  
23 managing the pandemic here and now but also as a preparation for the next health emergency.  
24  
25  
26  
27  
28  
29  
30  
31  
32  
33  
34  
35  
36  
37  
38  
39  
40  
41  
42  
43  
44  
45  
46  
47  
48  
49  
50  
51  
52  
53  
54  
55  
56  
57  
58  
59  
60

## References

- [1] WHO (2020). WHO Director-General's opening remarks at the media briefing on COVID-19 - 21 August 2020. <https://www.who.int/dg/speeches/detail/who-director-general-s-opening-remarks-at-the-media-briefing-on-covid-19---21-august-2020>
- [2] Britton, T., Ball, F., & Trapman, P. (2020). A mathematical model reveals the influence of population heterogeneity on herd immunity to SARS-CoV-2. *Science*, 369, 846–849
- [3] Sanche, S., Lin, Y. T., Xu, C., Romero-Severson, E., Hengartner, N., & Ke, R. (2020). High contagiousness and rapid spread of severe acute respiratory syndrome coronavirus 2. *Emerging Infectious Diseases*, 26
- [4] Dubé, E., Laberge, C., Guay, M., Bramadat, P., Roy, R., & Bettinger, J. A. (2013). Vaccine hesitancy: an overview. *Human vaccines & immunotherapeutics*, 9(8), 1763-1773.
- [5] Larson, H., de Figueiredo, A., Karafillakis, E., & Rawal, M. (2018). State of vaccine confidence in the EU 2018. *Luxembourg: Publications Office of the European Union*, 10, 241099.
- [6] The DELVE Initiative (2020), *SARS-CoV-2 Vaccine Development & Implementation; Scenarios, Options, Key Decisions*. DELVE Report No. 6. Published 01 October 2020. Available from <http://rs-delve.github.io/reports/2020/10/01/covid19-vaccination-report.html>.
- [7] Schuster, M., & Duclos, P. (2015). WHO recommendations regarding vaccine hesitancy. *Vaccine*, 33(34), 4155-218.
- [8] Lazarus, J. V., Ratzan, S. C., Palayew, A., Gostin, L. O., Larson, H. J., Rabin, K., ... & El-Mohandes, A. (2020). A global survey of potential acceptance of a COVID-19 vaccine. *Nature medicine*, 1-4.
- [9] Betsch, C., Schmid, P., Heinemeier, D., Korn, L., Holtmann, C., & Böhm, R. (2018). Beyond confidence: Development of a measure assessing the 5C psychological antecedents of vaccination. *PloS one*, 13(12), e0208601.
- [10] MacDonald, N. E. (2015). Vaccine hesitancy: Definition, scope and determinants. *Vaccine*, 33(34), 4161-4164.

- 1  
2  
3 [11] Guay, M., Gosselin, V., Petit, G., Baron, G., & Gagneur, A. (2019). Determinants of  
4 vaccine hesitancy in Quebec: a large population-based survey. *Human Vaccines &*  
5 *Immunotherapeutics*, *15*(11), 2527-2533.  
6  
7  
8  
9 [12] Nan, X., Zhao, X., & Briones, R. (2014). Parental cancer beliefs and trust in health  
10 information from medical authorities as predictors of HPV vaccine acceptability. *Journal of*  
11 *Health Communication*, *19*(1), 100-114.  
12  
13  
14 [13] Roozenbeek, J., Schneider, C. R., Dryhurst, S., Kerr, J., Freeman, A. L., Recchia, G., &  
15 van der Linden, S. (2020a). Susceptibility to misinformation about COVID-19 around the  
16 world. *Royal Society Open Science*, *7*(10), 201199.  
17  
18  
19 [14] Baumgaertner, B., Carlisle, J. E., & Justwan, F. (2018). The influence of political ideology  
20 and trust on willingness to vaccinate. *PloS one*, *13*(1), e0191728.  
21  
22  
23 [15] Bolsen, T., Druckman, J. N., & Cook, F. L. (2014). The influence of partisan motivated  
24 reasoning on public opinion. *Political Behavior*, *36*(2), 235-262.  
25  
26  
27 [16] Jolley, D., & Douglas, K. M. (2014). The effects of anti-vaccine conspiracy theories on  
28 vaccination intentions. *PloS one*, *9*(2), e89177.  
29  
30  
31 [17] Tomljenovic, H., Bubic, A., & Erceg, N. (2020). It just doesn't feel right—the relevance of  
32 emotions and intuition for parental vaccine conspiracy beliefs and vaccination uptake.  
33 *Psychology & Health*, *35*(5), 538-554.  
34  
35  
36 [18] Freeman, D., Waite, F., Rosebrock, L., Petit, A., Causier, C., East, A., ... & Bold, E.  
37 (2020). Coronavirus conspiracy beliefs, mistrust, **and** compliance with government guidelines  
38 in England. *Psychological Medicine*, 1-30.  
39  
40  
41 [19] Salali, G. D., & Uysal, M. S. (2020). COVID-19 vaccine hesitancy is associated with  
42 beliefs on the origin of the novel coronavirus in the UK and Turkey. *Psychological medicine*,  
43 1-3.  
44  
45  
46 [20] McManus, S., D'Ardenne, J., & Wessely, S. (2020). Covid conspiracies: misleading  
47 evidence can be more damaging than no evidence at all. *Psychological Medicine*, *21*, 1-2.  
48  
49  
50  
51  
52  
53  
54  
55  
56  
57  
58  
59  
60



1  
2  
3 [21] Roozenbeek, J., van der Linden, S., & Nygren, T. (2020b). Prebunking interventions based  
4 on “inoculation” theory can reduce susceptibility to misinformation across cultures. *Harvard*  
5 *Kennedy School Misinformation Review*, 1(2).  
6  
7

8  
9 [22] Roozenbeek, J., & Van Der Linden, S. (2019). The fake news game: actively inoculating  
10 against the risk of misinformation. *Journal of Risk Research*, 22(5), 570-580.  
11  
12

13 [23] Van Der Linden, S., Maibach, E., Cook, J., Leiserowitz, A., & Lewandowsky, S. (2017).  
14 Inoculating against misinformation. *Science*, 358(6367), 1141-1142.  
15  
16

17 [24] World Health Organization. (2020). *Pandemic fatigue: reinvigorating the public to*  
18 *prevent COVID-19: policy framework for supporting pandemic prevention and management:*  
19 *revised version November 2020* (No. WHO/EURO: 2020-1573-41324-56242). World Health  
20 Organization. Regional Office for Europe.  
21  
22  
23  
24

25 [25] Michie, S., West, R., & Harvey, N. (2020). The concept of “fatigue” in tackling covid-19.  
26 *bmj*, 371.  
27  
28  
29

30 [26] Jørgensen, F. J., Bor, A., & Petersen, M. B. (2020). Compliance Without Fear: Predictors  
31 of Protective Behavior During the First Wave of the COVID-19 Pandemic. *PsyArXiv*. May, 19.  
32  
33

34 [27] Dror, A. A., Eisenbach, N., Taiber, S., Morozov, N. G., Mizrachi, M., Zigran, A., & Sela,  
35 E. (2020). Vaccine hesitancy: the next challenge in the fight against COVID-19. *European*  
36 *journal of epidemiology*, 35(8), 775-779.  
37  
38  
39  
40

41 [28] Wong, L. P., Alias, H., Wong, P. F., Lee, H. Y., & AbuBakar, S. (2020). The use of the  
42 health belief model to assess predictors of intent to receive the COVID-19 vaccine and  
43 willingness to pay. *Human vaccines & immunotherapeutics*, 1-11.  
44  
45  
46

47 [29] Hacquin, A. S., Altay, S., de Araujo, E., Chevallier, C., & Mercier, H. (2020). Sharp rise  
48 in vaccine hesitancy in a large and representative sample of the French population: reasons for  
49 vaccine hesitancy.  
50  
51  
52

53 [30] Wagner, A. L., Masters, N. B., Domek, G. J., Mathew, J. L., Sun, X., Asturias, E. J., ... &  
54 Boulton, M. L. (2019). Comparisons of vaccine hesitancy across five low-and middle-income  
55 countries. *Vaccines*, 7(4), 155.  
56  
57  
58  
59  
60

- 1  
2  
3 [31] Bertonecello, C., Ferro, A., Fonzo, M., Zanovello, S., Napoletano, G., Russo, F., ... &  
4 Cocchio, S. (2020). Socioeconomic Determinants in Vaccine Hesitancy and Vaccine Refusal  
5 in Italy. *Vaccines*, 8(2), 276.  
6  
7  
8  
9 [32] Fine, P., Eames, K., & Heymann, D. L. (2011). "Herd immunity": a rough guide. *Clinical*  
10 *infectious diseases*, 52(7), 911-916.  
11  
12  
13 [33] Johnson, T., Dawes, C., Fowler, J., & Smirnov, O. (2020). Slowing COVID-19  
14 transmission as a social dilemma: Lessons for government officials from interdisciplinary  
15 research on cooperation. *Journal of Behavioral Public Administration*, 3(1).  
16  
17  
18 [34] Siegal, G., Siegal, N., & Bonnie, R. J. (2009). An account of collective actions in public  
19 health. *American Journal of Public Health*, 99(9), 1583-1587.  
20  
21  
22 [35] Callaghan, T., Moghtaderi, A., Lueck, J. A., Hotez, P., Strych, U., Dor, A., ... & Motta,  
23 M. (2020). Correlates and disparities of intention to vaccinate against COVID-19. *Social*  
24 *science & medicine (1982)*.  
25  
26 [36] Guidry, J. P., Laestadius, L. I., Vraga, E. K., Miller, C. A., Perrin, P. B., Burton, C. W., ...  
27 & Carlyle, K. E. (2021). Willingness to get the COVID-19 vaccine with and without emergency  
28 use authorization. *American journal of infection control*, 49(2), 137-142.  
29  
30 [37] Neumann-Böhme, S., & Sabat, I. Now, we have it. Will we use it? New results from ECOS  
31 on the willingness to be vaccinated against COVID-19.  
32  
33 [38] Motta, M., Sylvester, S., Callaghan, T., & Trujillo, K. L. (2020). *Encouraging COVID-19*  
34 *Vaccine Uptake through Effective Health Communication* (No. 4d25e). Center for Open  
35 Science.  
36  
37 [39] Betsch, C., Böhm, R., & Chapman, G. B. (2015). Using behavioral insights to increase  
38 vaccination policy effectiveness. *Policy Insights from the Behavioral and Brain Sciences*, 2(1),  
39 61-73  
40  
41 [40] Bartusevičius, H., Bor, A., Jørgensen, F. J., & Petersen, M. B. (2020). The psychological  
42 burden of the COVID-19 pandemic drives anti-systemic attitudes and political violence.  
43  
44 [41] WHO (2017). *Vaccination and trust: How concerns arise and the role of communication*  
45 *in mitigating crises*. Report available at  
46  
47  
48  
49  
50  
51  
52  
53  
54  
55  
56  
57  
58  
59  
60

1  
2  
3 [https://www.euro.who.int/\\_data/assets/pdf\\_file/0004/329647/Vaccines-and-trust.PDF](https://www.euro.who.int/_data/assets/pdf_file/0004/329647/Vaccines-and-trust.PDF),  
4 accessed March 4, 2021.  
5  
6

7 [42] Irving, S. A., Donahue, J. G., Shay, D. K., Ellis-Coyle, T. L., & Belongia, E. A. (2009).  
8 Evaluation of self-reported and registry-based influenza vaccination status in a Wisconsin  
9 cohort. *Vaccine*, 27(47), 6546-6549.  
10  
11  
12

13  
14 [43] Irving, S. A., Donahue, J. G., Shay, D. K., Ellis-Coyle, T. L., & Belongia, E. A. (2009).  
15 Evaluation of self-reported and registry-based influenza vaccination status in a Wisconsin  
16 cohort. *Vaccine*, 27(47), 6546-6549.  
17  
18  
19

20  
21 [44] Smith, R., Hubers, J., Farraye, F. A., Sampene, E., Hayney, M. S., & Caldera, F. (2020).  
22 Accuracy of Self-Reported Vaccination Status in a Cohort of Patients with Inflammatory  
23 Bowel Disease. *Digestive Diseases and Sciences*, 1-7.  
24  
25  
26  
27  
28  
29  
30  
31  
32  
33  
34  
35  
36  
37  
38  
39  
40  
41  
42  
43  
44  
45  
46  
47  
48  
49  
50  
51  
52  
53  
54  
55  
56  
57  
58  
59  
60

## Figure captions and legends

### Figure 1: Development in vaccine acceptance for an approved COVID-19 vaccine

Note: N = 18,231. The figure illustrates the development in vaccine acceptance across countries. Vaccine acceptance is here defined as the proportion who answers “Somewhat agree” or “Completely agree” to the question: “If the health authorities advise people like me to get an approved vaccine against the coronavirus, I will follow their advice.”

### Figure 2: Individual-level correlations of vaccine acceptance

Note: N = 18,231. Black circles are the estimated correlations based on model I-II in Table A4 in the OA. Model II includes control for country dummies. Horizontal bars are the associated 95 % confidence interval.

### Figure 3: Macro-level correlations of vaccine acceptance

Note: The figure plots country averages for vaccine acceptance and country averages for four measures: Trust in health authorities, egotropic concern related to COVID-19, endorsement of COVID-19 conspiracy beliefs and the degree of changed behavior to avoid spreading infections during the COVID-19 pandemic. Reported correlations are pearson's r.

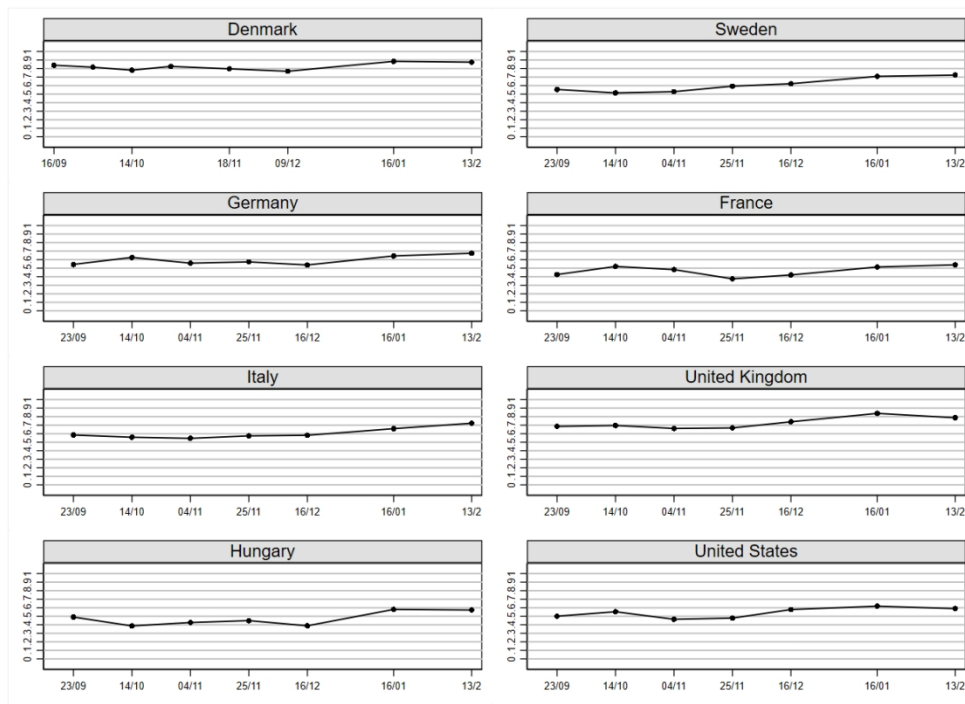

**Figure 1:** Development in vaccine acceptance for an approved COVID-19 vaccine / Note: N = 18,231. The figure illustrates the development in vaccine acceptance across countries. Vaccine acceptance is here defined as the proportion who answers "Somewhat agree" or "Completely agree" to the question: "If the health authorities advise people like me to get an approved vaccine against the coronavirus, I will follow their advice."

450x327mm (72 x 72 DPI)

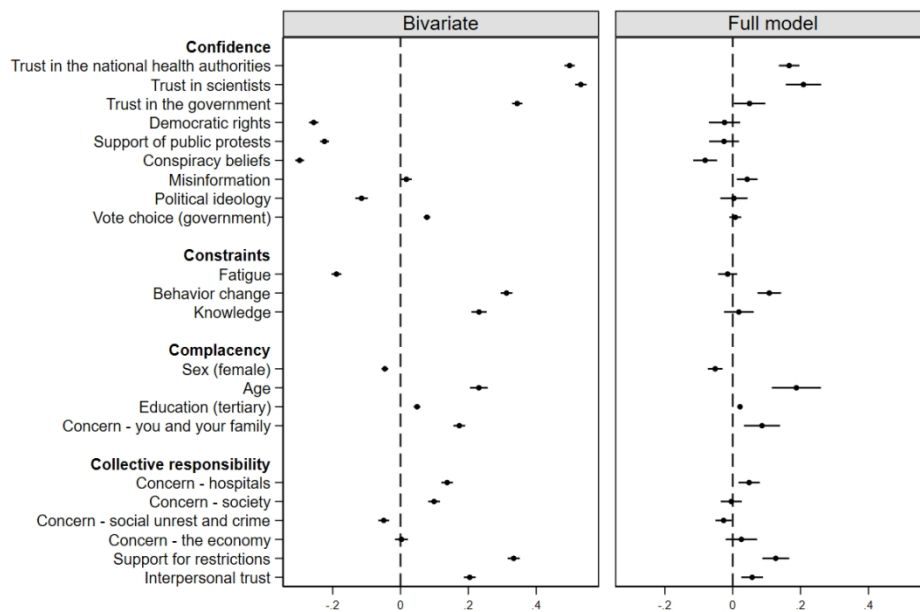

**Figure 2:** Individual-level correlations of vaccine acceptance / Note: N = 18,231. Black circles are the estimated correlations based on model I-II in Table A4 in the OA. Model II includes control for country dummies. Horizontal bars are the associated 95 % confidence interval.

451x300mm (72 x 72 DPI)



**Figure 3:** Macro-level correlations of vaccine acceptance / Note: The figure plots country averages for vaccine acceptance and country averages for four measures: Trust in health authorities, egotropic concern related to COVID-19, endorsement of COVID-19 conspiracy beliefs and the degree of changed behavior to avoid spreading infections during the COVID-19 pandemic. Reported correlations are pearson’s r.

450x327mm (72 x 72 DPI)

**Table A1:** Overview of data collection

| <b>Country</b> | <b>Dates</b>                           | <b>Obs.</b> |
|----------------|----------------------------------------|-------------|
| Denmark        | September 13, 2020 – February 16, 2021 | 2,765       |
| Sweden         | September 20, 2020 – February 16, 2021 | 2,149       |
| United Kingdom | September 20, 2020 – February 16, 2021 | 2,437       |
| United States  | September 20, 2020 – February 16, 2021 | 2,185       |
| Italy          | September 20, 2020 – February 16, 2021 | 2,411       |
| France         | September 20, 2020 – February 16, 2021 | 2,090       |
| Germany        | September 20, 2020 – February 16, 2021 | 2,380       |
| Hungary        | September 20, 2020 – February 16, 2021 | 1,814       |



**Table A2:** Descriptive statistics

|                                      | Mean | SD   | Min | Max | N      |
|--------------------------------------|------|------|-----|-----|--------|
| <b>Vaccine acceptance</b>            | 0.66 | 0.34 | 0   | 1   | 18,231 |
| <b>Confidence</b>                    |      |      |     |     |        |
| Trust in national health authorities | 0.70 | 0.29 | 0   | 1   | 18,231 |
| Trust in scientists                  | 0.76 | 0.26 | 0   | 1   | 18,231 |
| Trust in the government              | 0.54 | 0.31 | 0   | 1   | 18,231 |
| Concern about democratic rights      | 0.47 | 0.35 | 0   | 1   | 18,231 |
| Support for protests                 | 0.36 | 0.36 | 0   | 1   | 18,231 |
| Conspiracy beliefs                   | 0.46 | 0.36 | 0   | 1   | 18,231 |
| Misinformation                       | 0.60 | 0.31 | 0   | 1   | 18,231 |
| Political ideology                   | 0.50 | 0.26 | 0   | 1   | 18,231 |
| Vote choice (government)             | 0.47 | 0.50 | 0   | 1   | 18,231 |
| <b>Constraints</b>                   |      |      |     |     |        |
| Fatigue                              | 0.37 | 0.33 | 0   | 1   | 18,231 |
| Behavior change                      | 0.73 | 0.27 | 0   | 1   | 18,231 |
| Knowledge                            | 0.80 | 0.22 | 0   | 1   | 18,231 |
| <b>Complacency</b>                   |      |      |     |     |        |
| Sex (female)                         | 0.46 | 0.50 | 0   | 1   | 18,231 |
| Age                                  | 0.35 | 0.18 | 0   | 1   | 18,231 |
| Education (tertiary)                 | 0.50 | 0.50 | 0   | 1   | 18,231 |
| Concern - you and your family        | 0.67 | 0.28 | 0   | 1   | 18,231 |
| <b>Collective responsibility</b>     |      |      |     |     |        |
| Concern - hospitals                  | 0.71 | 0.29 | 0   | 1   | 18,231 |
| Concern - society                    | 0.69 | 0.28 | 0   | 1   | 18,231 |
| Concern - social unrest and crime    | 0.63 | 0.31 | 0   | 1   | 18,231 |
| Concern - the country's economy      | 0.78 | 0.26 | 0   | 1   | 18,231 |
| Support for restrictions             | 0.69 | 0.27 | 0   | 1   | 18,231 |
| Interpersonal trust                  | 0.50 | 0.28 | 0   | 1   | 18,231 |

**Table A3:** Coding of vote choice variable

| <b>Country</b> | <b>Government</b>       | <b>Opposition</b>      |
|----------------|-------------------------|------------------------|
| Denmark        | Socialdemokratiet       | Konservative           |
|                | Radikale                | Nye Borgerlige         |
|                | Socialistisk Folkeparti | Klaus Riskjær Pedersen |
|                | Enhedslisten            | Liberal Alliance       |
|                |                         | Kristendemokraterne    |
|                |                         | Dansk Folkeparti       |
|                |                         | Stram Kurs             |
| Sweden         |                         | Venstre                |
|                |                         | Alternativet           |
|                | Miljöpartiet            | Kristendemokraterna    |
|                | Socialdemokraterna      | Moderaterna            |
|                | Vänsterpartiet          | Sverigedemokraterna    |
| United Kingdom | Centerpartiet           |                        |
|                | Liberalerna             |                        |
|                | Conservative            | Labour                 |
|                |                         | SNP                    |
| United States  |                         | Liberal Democrats      |
|                | Republicans             | Democrats              |
| Italy          | Centre-Left             | Centre-Right           |
|                | Five Star Movement      | Free and Equal         |
| France         | Macron                  | Fillon                 |
|                |                         | Le Pen                 |
|                |                         | Dupont-Aignan          |
|                |                         | Hamon                  |
|                |                         | Melenchon              |
| Germany        | CDU/SDU                 | AfD                    |
|                | SPD                     | FDP                    |
|                |                         | Die Linke              |
|                |                         | Grüne                  |
| Hungary        | Fidesz-KDNP             | Jobbik                 |
|                |                         | MSZP-MM                |
|                |                         | LMP                    |
|                |                         | DK                     |
|                |                         | MM                     |

Figure A1: Bivariate correlations



only

**Figure A2:** Replicating the analysis with categorical trust variables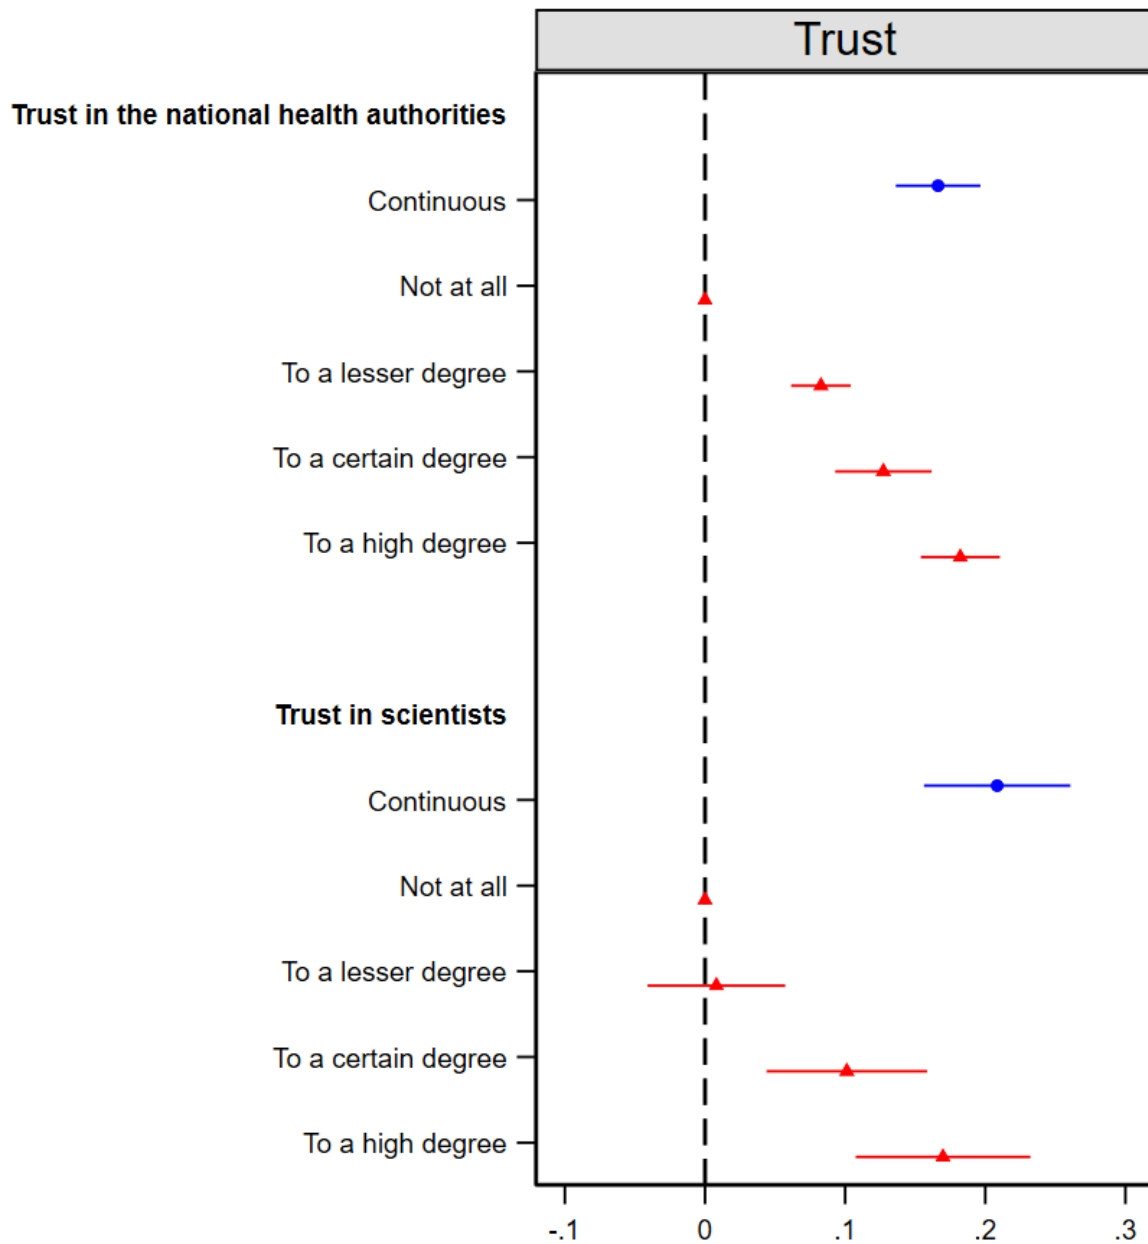

Note: N = 18,231. Blue circles are the estimated correlations based on model II in Table A4 (continuous trust variables). Red triangles are the estimated correlations based on the same model, using categorical trust variables instead. Both models include control for country dummies. Horizontal lines are the associated 95 % confidence intervals.

**Figure A3:** Replicating the analysis with categorical concern variables

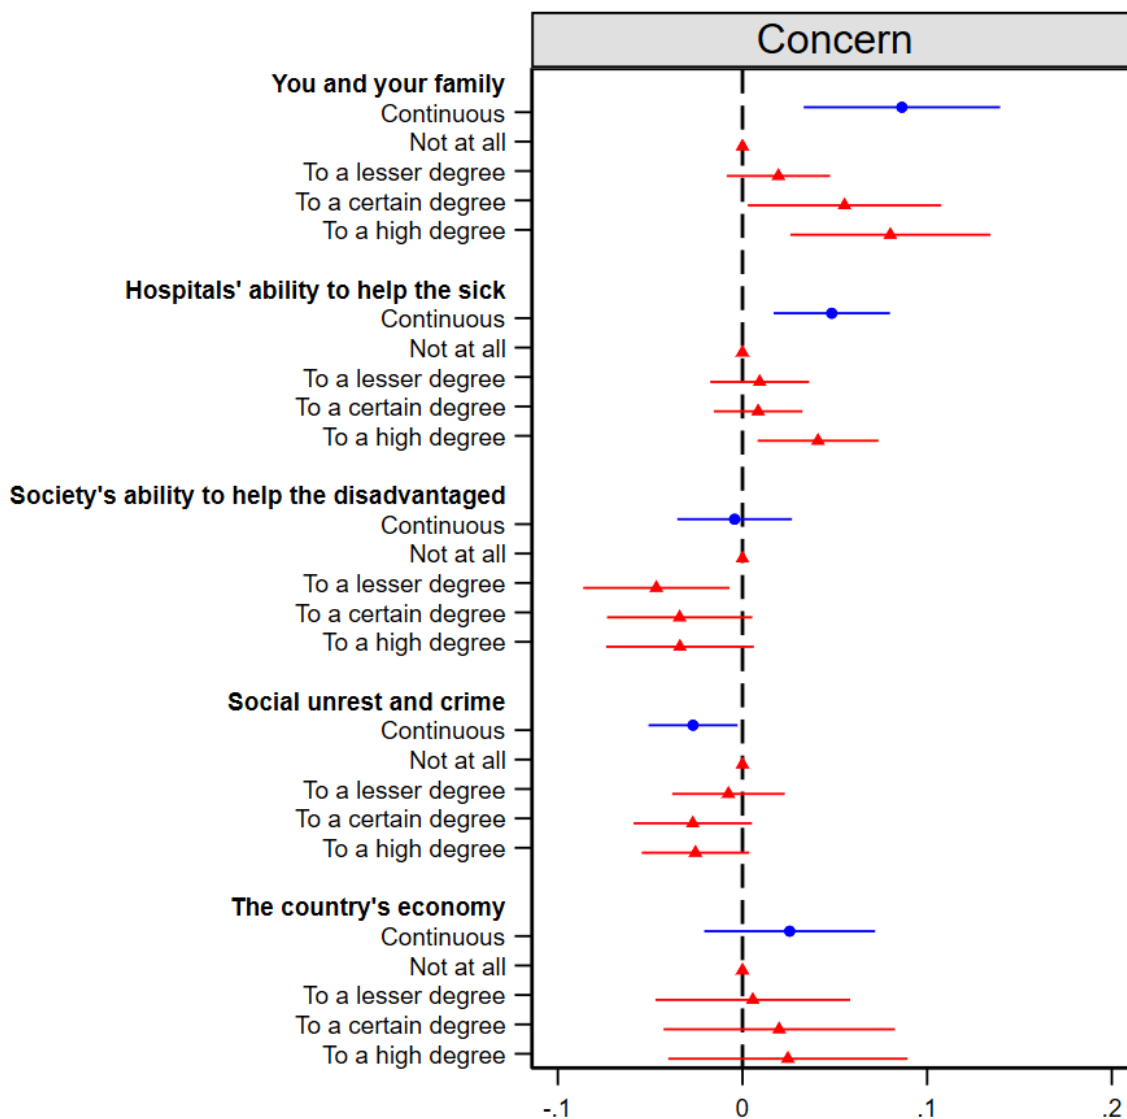

Note: N=18,231. Blue circles are the estimated correlations based on model II in Table A4 (continuous concern variables). Red triangles are the estimated correlations based on the same model, using categorical concern variables instead. Both models include control for country dummies. Horizontal lines are the associated 95 % confidence intervals.

**Figure A4:** Replicating the analysis with a categorical behavior change variable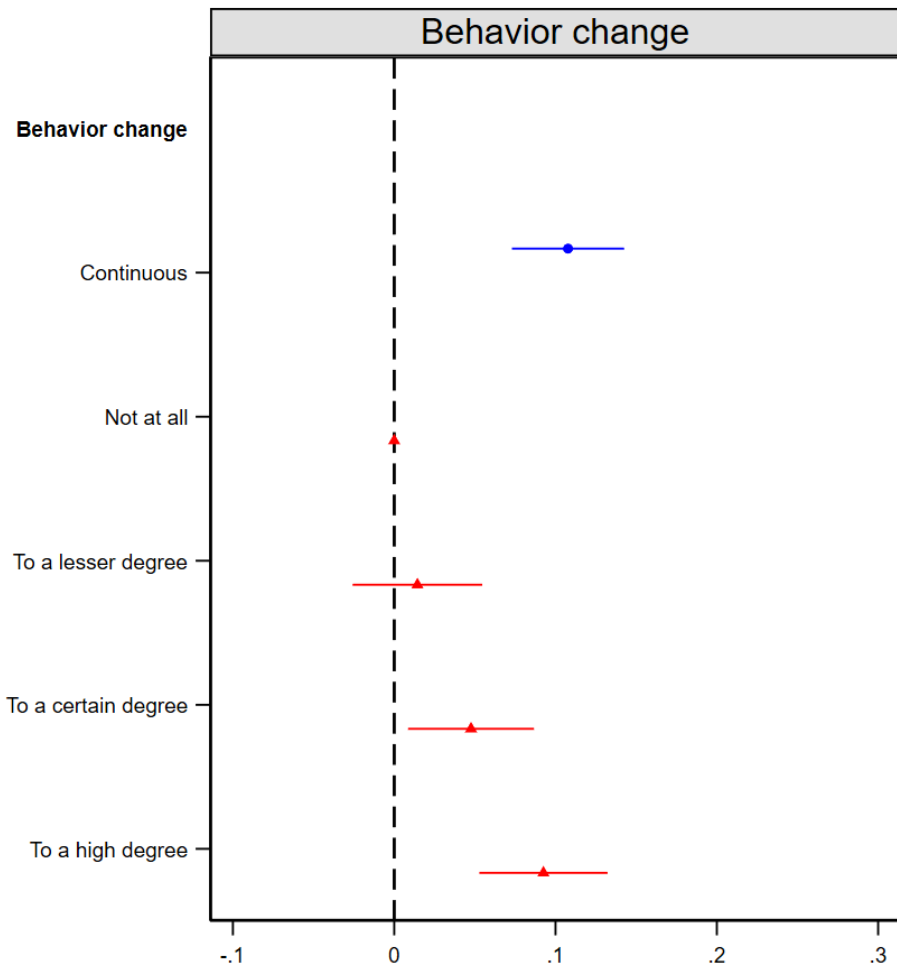

Note: N = 18,231. Blue circles are the estimated correlations based on model II in Table A4 (continuous behavior change variable). Red triangles are the estimated correlations based on the same model, using a categorical behavior change variable instead. Both models include control for country dummies. Horizontal lines are the associated 95 % confidence intervals.

**Figure A5:** Replicating the analysis with a categorical knowledge variable

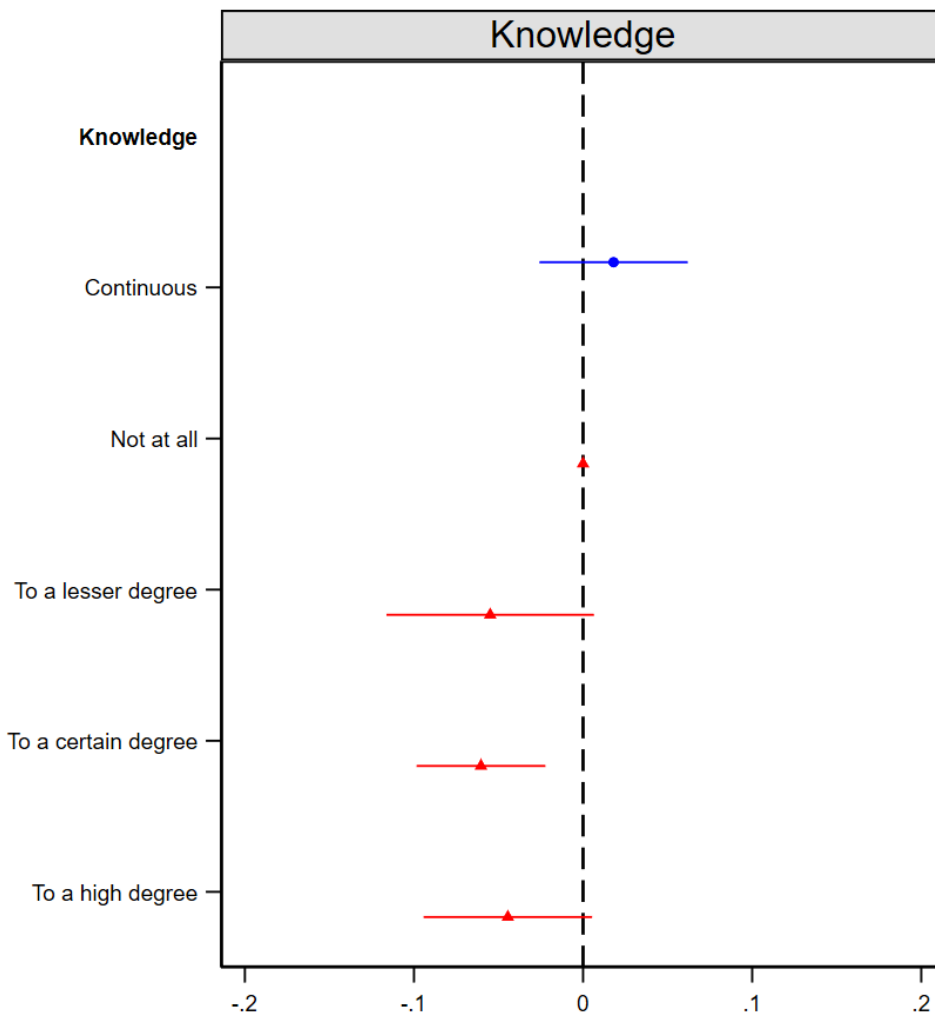

Note: N = 18,231. Blue circles are the estimated correlations based on model II in Table A4 (continuous knowledge variable). Red triangles are the estimated correlations based on the same model, using a categorical knowledge variable instead. Both models include control for country dummies. Horizontal lines are the associated 95 % confidence intervals.

**Figure A6:** Replicating the analysis with a dichotomous vaccine acceptance outcome

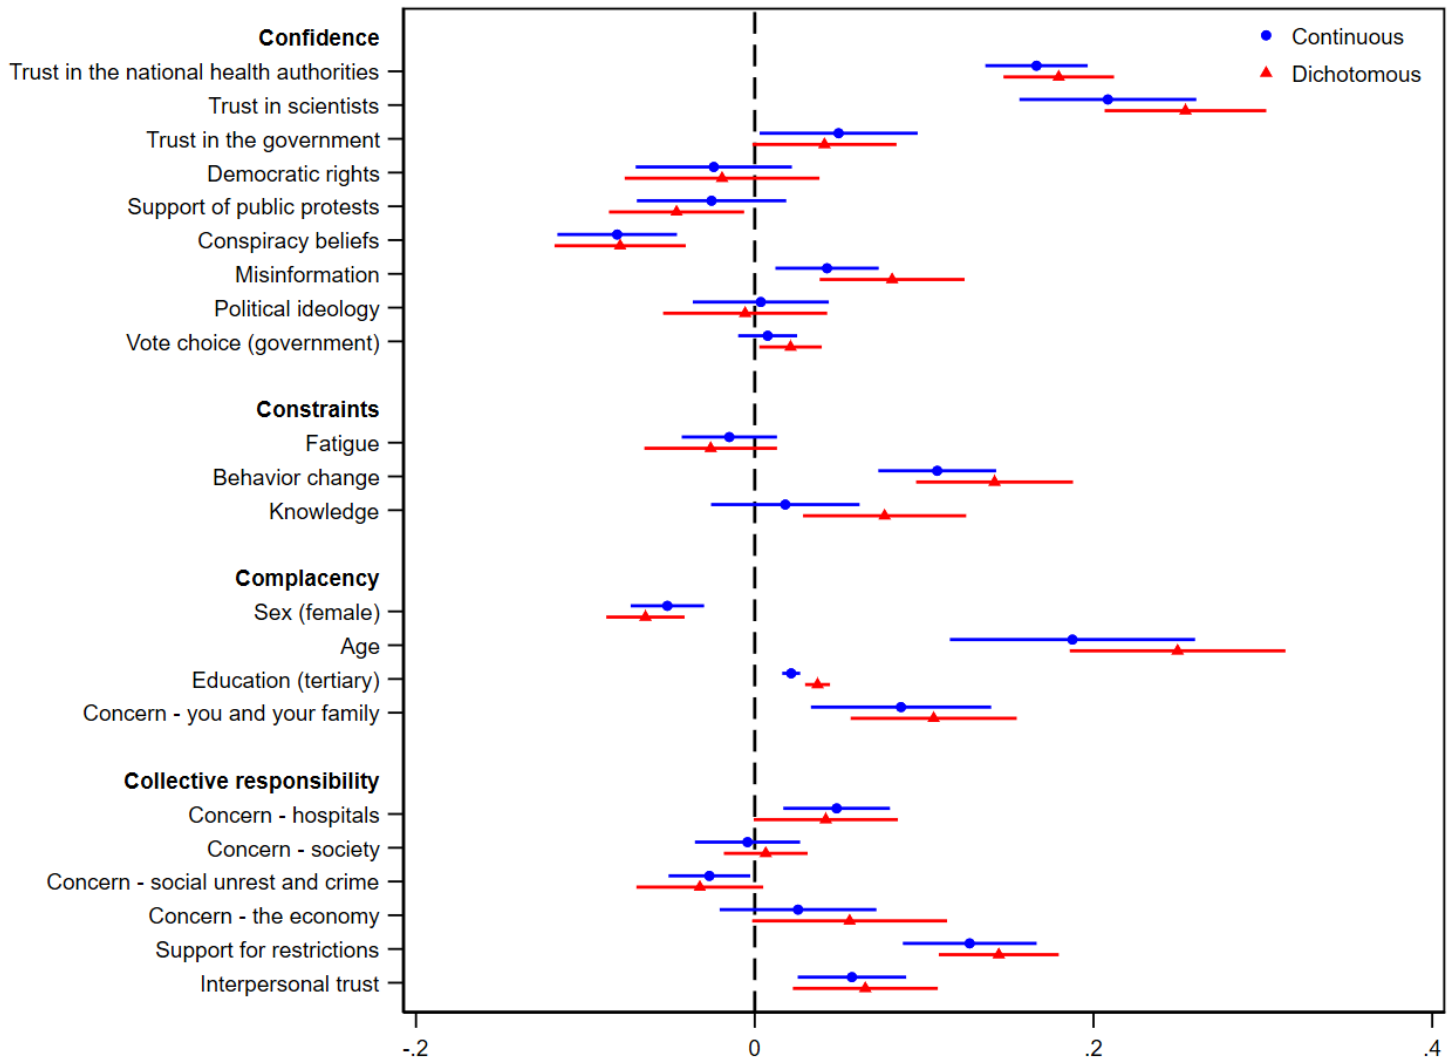

Note: N = 18,231. Blue circles are the estimated correlations based on model II in Table A4 (continuous outcome). Red triangles are the estimated correlations based on the same model, using a dichotomous measure of vaccine acceptance instead (with “somewhat agree” and “completely agree” taking the value 1, indicating vaccine acceptance). Both models include control for country dummies. Horizontal lines are the associated 95 % confidence intervals.



**Figure A7:** Comparing results before and after approval of COVID-19 vaccines

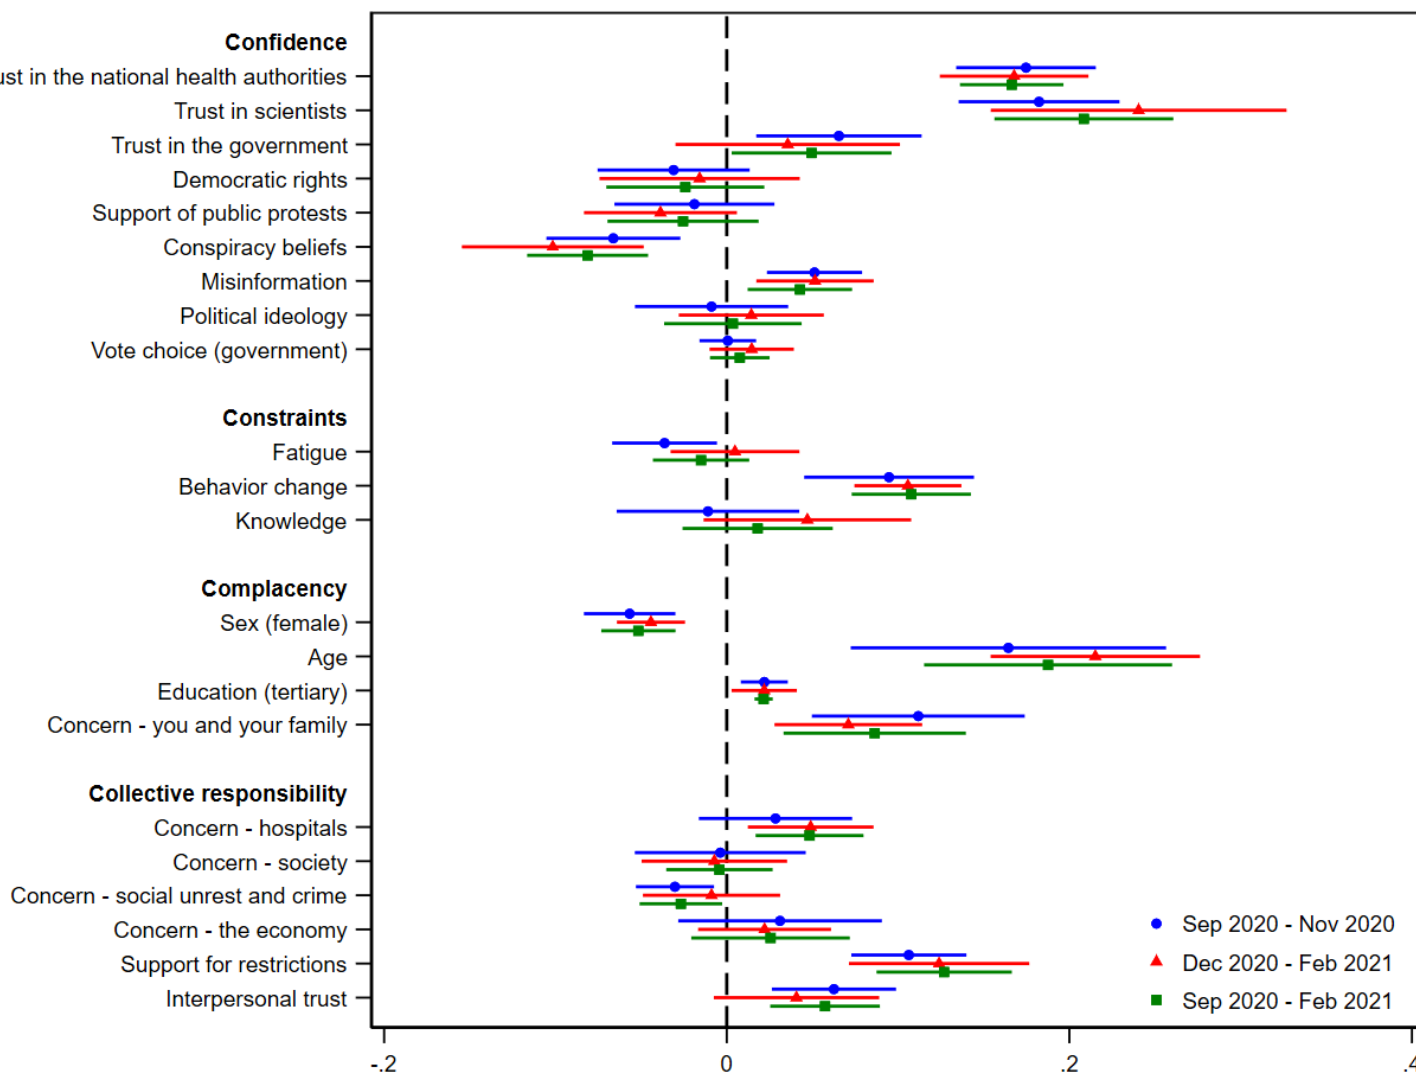

Note: N = 10,417 (September 2020 – November 2020). N = 7,814 (December 2020 – February 2021). N = 18,231 (September 2020 – February 2021). Green squares are the estimated correlations based on model II in Table A4 (September 2020 - November 2020). Blue circles are the estimated correlations based on the same model for September 2020 – November 2020. Red triangles are the estimated correlations based on the same model for December 2020 – February 2021. All models include control for country dummies. Horizontal lines are the associated 95 % confidence intervals.

**Figure A8:** Individual-level predictors in the US, controlling for region dummies

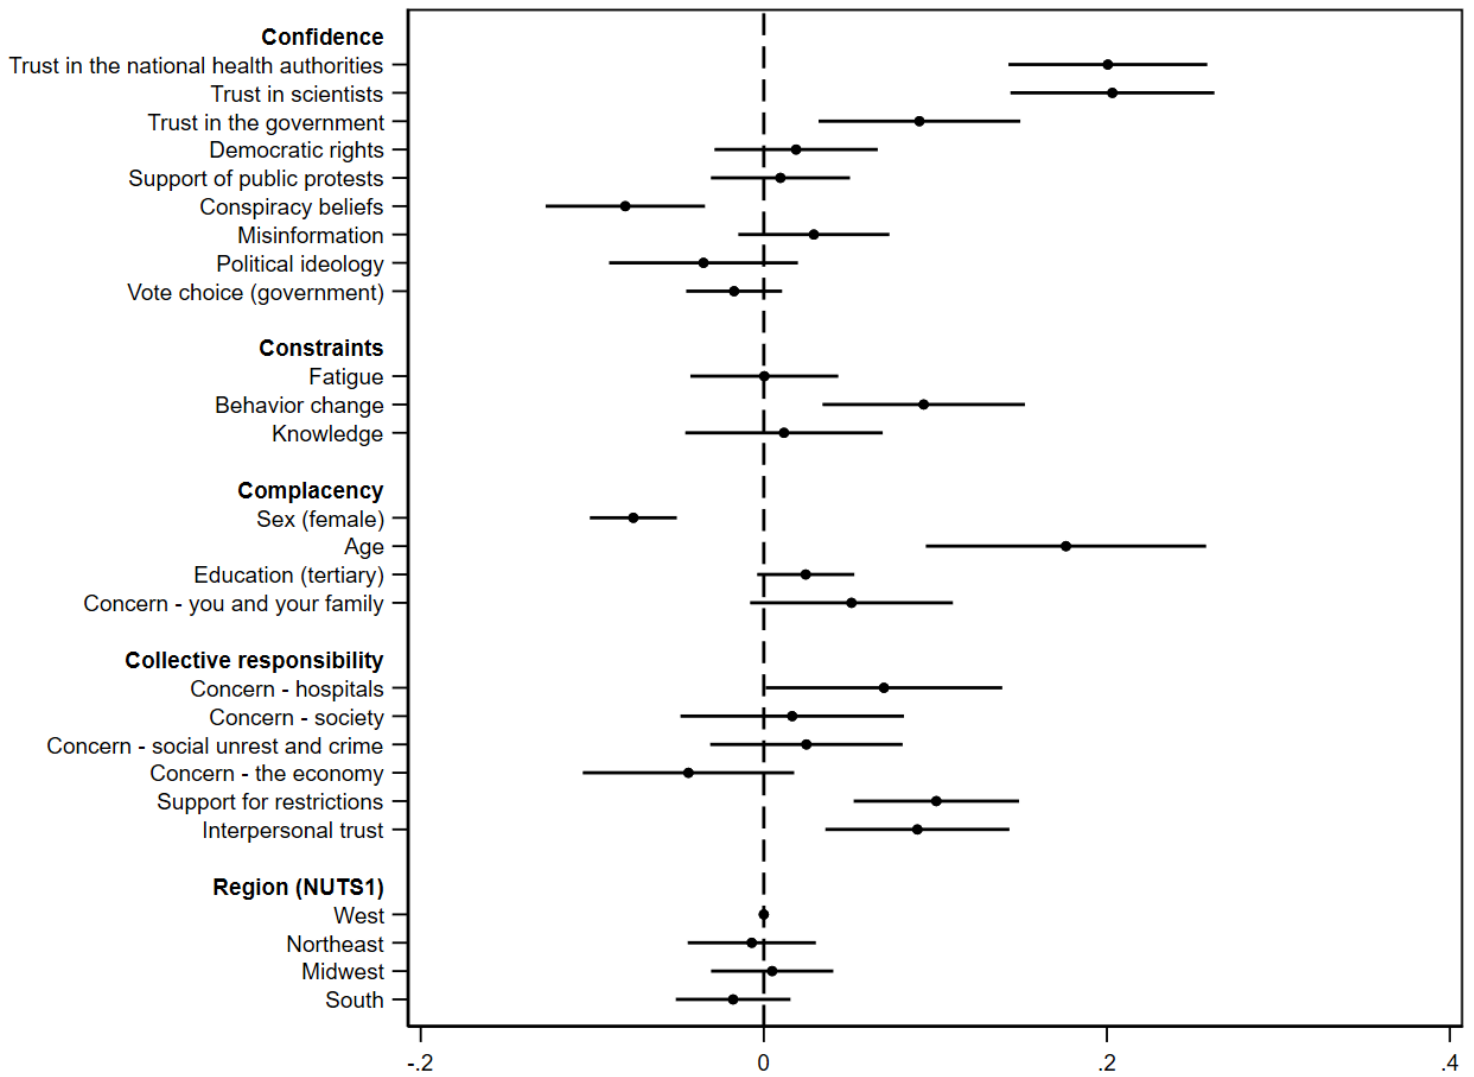

Note: N = 2,185. Circles are the estimated correlations. Horizontal lines are the associated 95 % confidence intervals.

**Figure A9:** Individual-level predictors in the US, controlling for state dummies

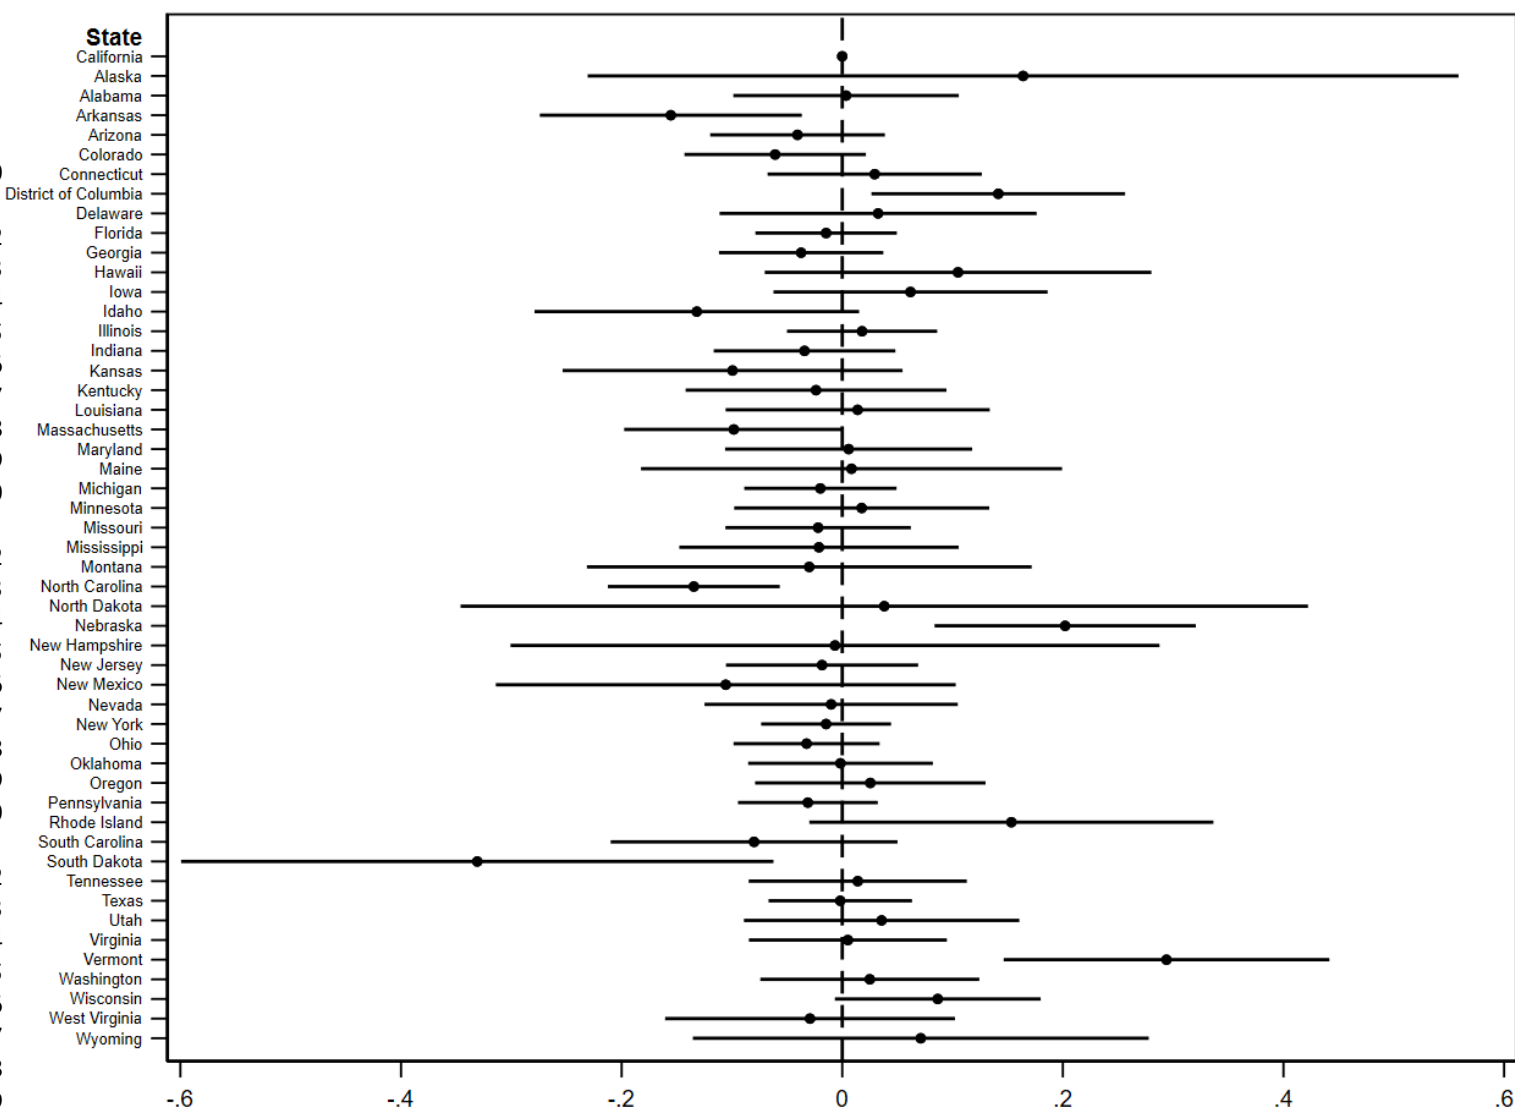

Note: N = 2,185. Circles are the estimated correlations. The model include all predictors from model II in table A4, controlling for state dummies instead of country level dummies. For simplicity, only the estimated correlations for the state dummies are illustrated here. Horizontal lines are the associated 95 % confidence intervals.

**Figure A10: Individual-level predictors in Germany, controlling for state dummies**

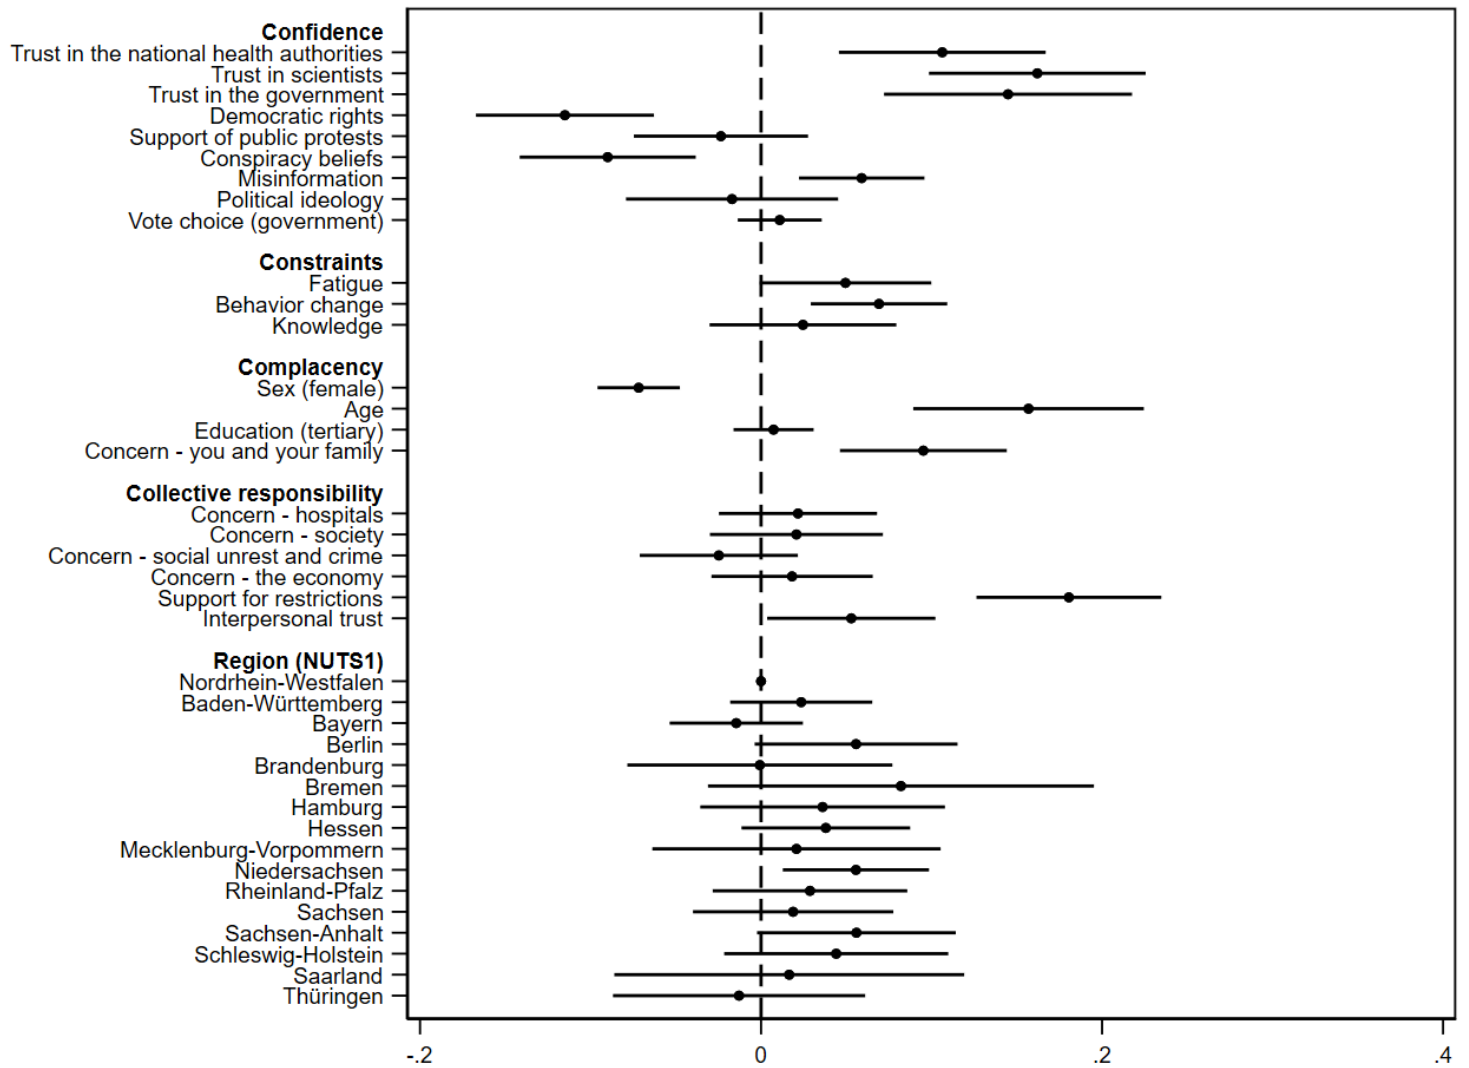

Note: N = 2,380. Circles are the estimated correlations. Horizontal lines are the associated 95 % confidence intervals.

**Table A4:** Individual-level predictors of vaccine acceptance

|                                   | <b>Model I</b> |         | <b>Model VI</b> |         |
|-----------------------------------|----------------|---------|-----------------|---------|
|                                   | Bivariate      |         | Full model      |         |
| <b>Confidence</b>                 |                |         |                 |         |
| Trust in health authorities       | 0.498***       | (0.008) | 0.166***        | (0.013) |
| Trust in scientists               | 0.531***       | (0.009) | 0.208***        | (0.022) |
| Trust in the government           | 0.344***       | (0.008) | 0.050*          | (0.020) |
| Concern about democratic rights   | -0.256***      | (0.007) | -0.024          | (0.020) |
| Support for protests              | -0.224***      | (0.007) | -0.026          | (0.019) |
| Conspiracy beliefs                | -0.297***      | (0.007) | -0.081***       | (0.015) |
| Misinformation                    | 0.017*         | (0.008) | 0.043*          | (0.013) |
| Ideology                          | -0.115***      | (0.009) | 0.004           | (0.017) |
| Vote choice (government)          | 0.078***       | (0.005) | 0.008           | (0.007) |
| <b>Constraints</b>                |                |         |                 |         |
| Fatigue                           | -0.189***      | (0.007) | -0.015          | (0.012) |
| Behavior change                   | 0.312***       | (0.009) | 0.108***        | (0.015) |
| Knowledge                         | 0.232***       | (0.011) | 0.018           | (0.019) |
| <b>Complacency</b>                |                |         |                 |         |
| Sex (female)                      | -0.046***      | (0.005) | -0.052***       | (0.009) |
| Age                               | 0.231***       | (0.013) | 0.188***        | (0.031) |
| Education (tertiary)              | 0.049***       | (0.005) | 0.022***        | (0.002) |
| Concern - you and your family     | 0.173***       | (0.009) | 0.086**         | (0.023) |
| <b>Collective responsibility</b>  |                |         |                 |         |
| Concern - hospitals               | 0.137***       | (0.009) | 0.048**         | (0.013) |
| Concern - society                 | 0.099***       | (0.009) | -0.004          | (0.013) |
| Concern - social unrest and crime | -0.049***      | (0.008) | -0.027*         | (0.010) |
| Concern - the country's economy   | 0.003          | (0.010) | 0.026           | (0.020) |
| Support for restrictions          | 0.334***       | (0.009) | 0.127***        | (0.017) |
| Interpersonal trust               | 0.204***       | (0.009) | 0.057**         | (0.014) |
| Constant                          |                |         | -0.034          | (0.025) |
| Observations                      | 18,231         |         | 18,231          |         |
| $R^2$                             | NA             |         | 0.322           |         |

Notes. Entries are unstandardized OLS regression coefficients from models with all variables standardized on a scale from 0-1. Clustered robust standard errors on country level in parentheses. Model 1 displays effects from bivariate models and, hence, a combined  $R^2$  cannot be computed. Model II includes control for country dummies. \*  $p < 0.05$ , \*\*  $p < 0.01$ , \*\*\*  $p < 0.001$ .

Figure A11: Individual-level correlations of vaccine acceptance by country

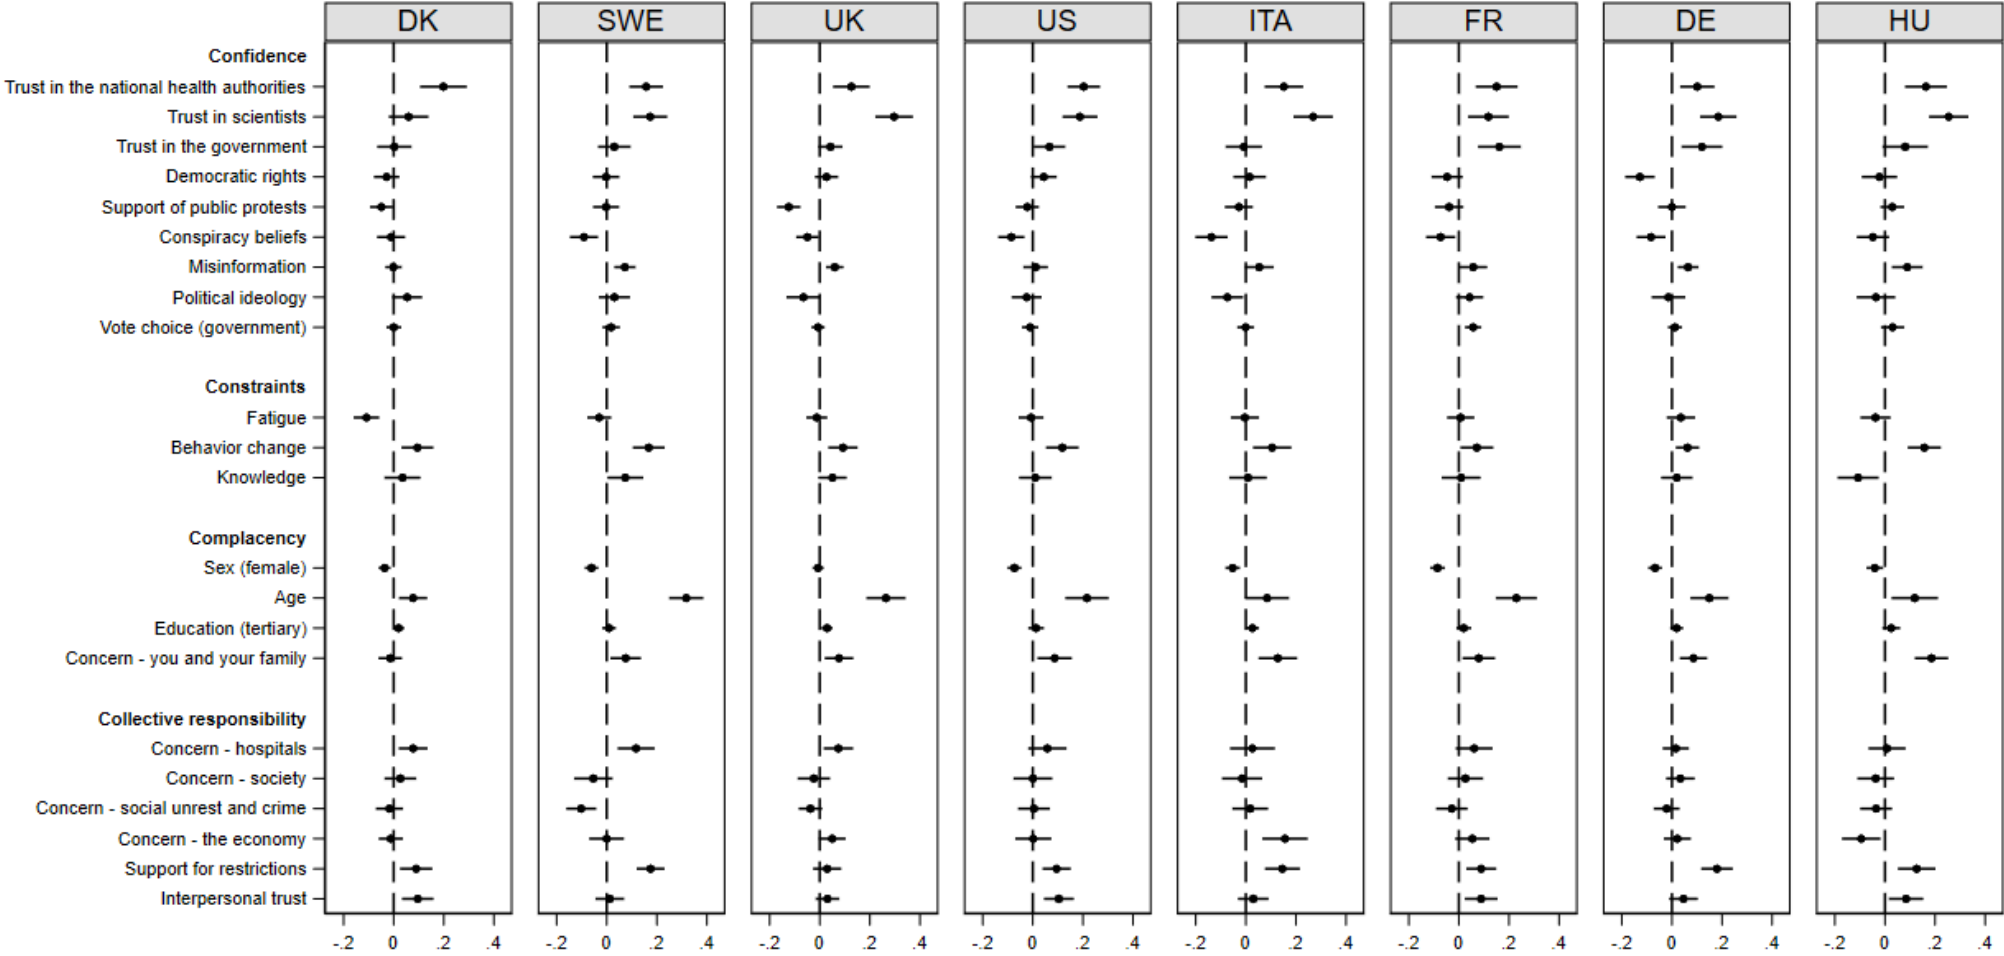

Note: N = 18,231. Black circles are the estimated correlations. Horizontal bars are the associated 95 % confidence intervals.

Figure A12: Bivariate correlations by country

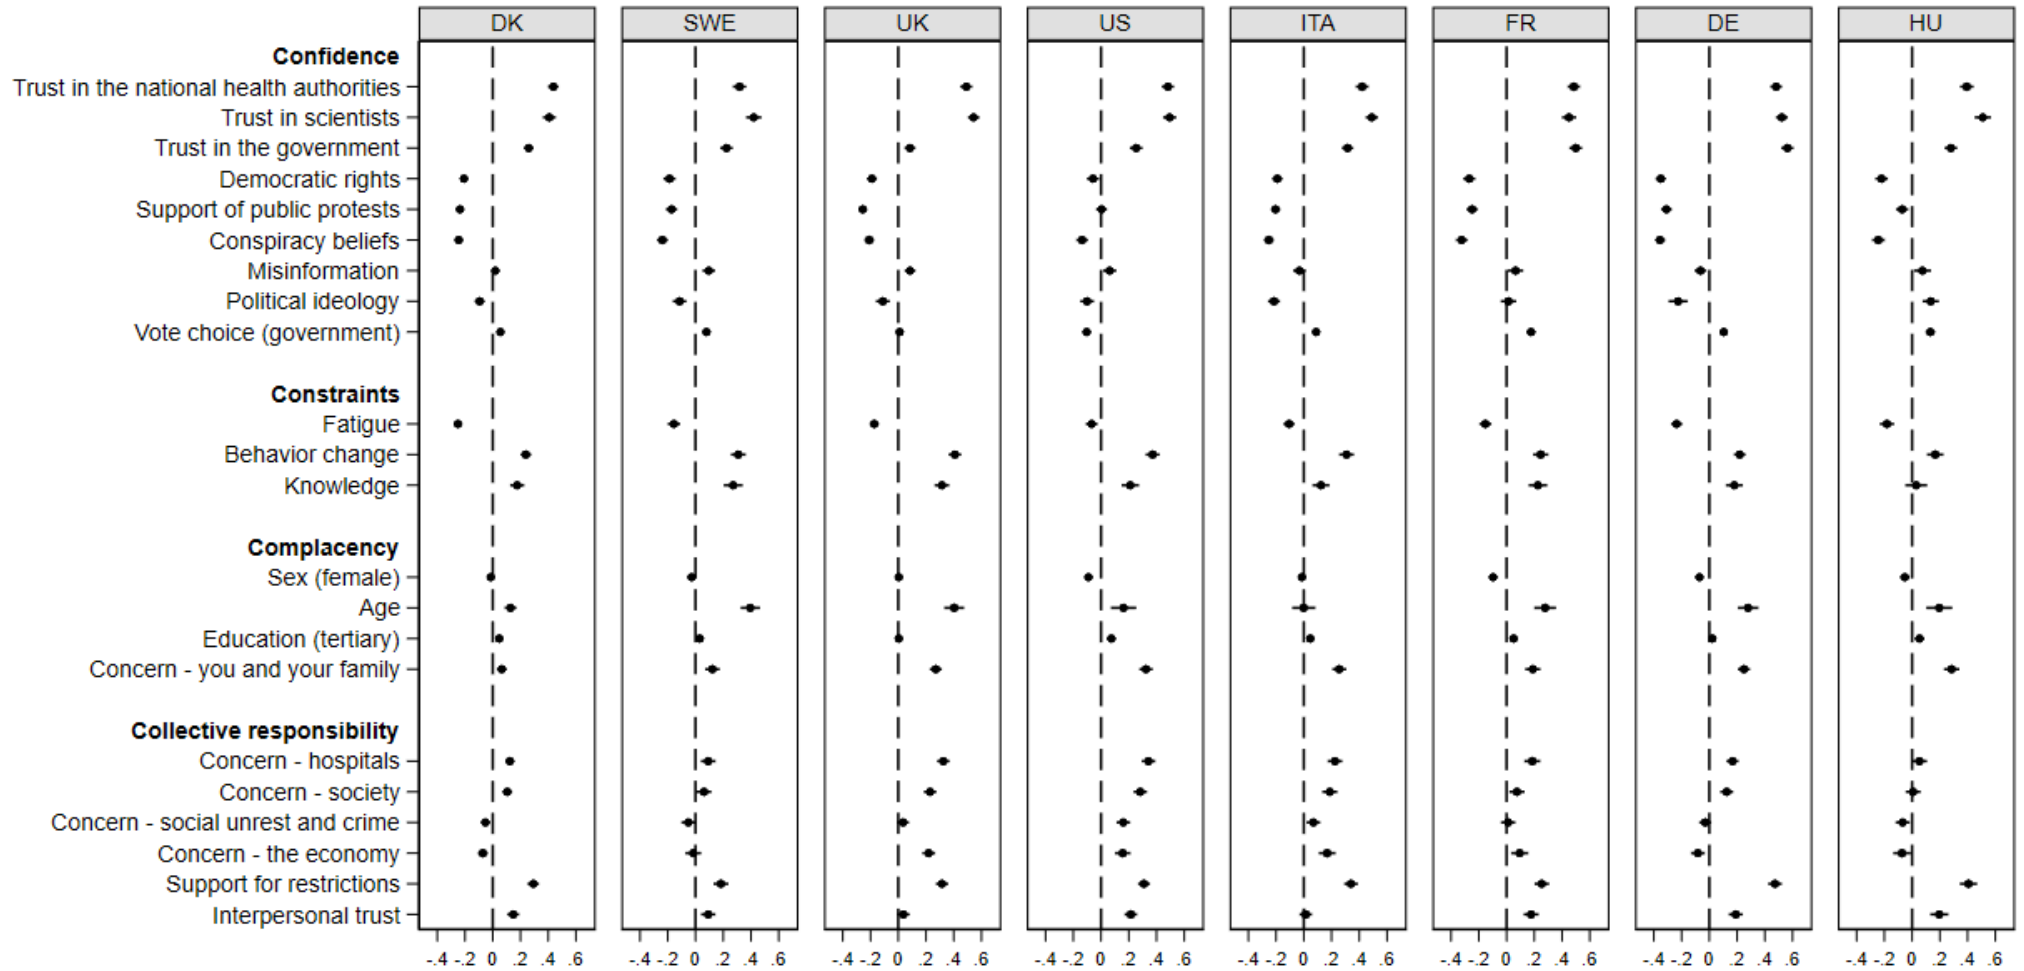

Note: N = 18,231. Black circles are the estimated bivariate correlations. Horizontal bars are the associated 95 % confidence intervals.

**Figure A13:** Subgroup analysis – sex

Note: N = 18,231. Blue circles and red triangles are the estimated correlations. Horizontal lines are the associated 95 % confidence intervals.



**Figure A14:** Subgroup analysis – age



Note: N = 18,231. Red circles, blue triangles and green squares are the estimated correlations. Horizontal lines are the associated 95 % confidence intervals.

**Figure A15: Subgroup analysis – education**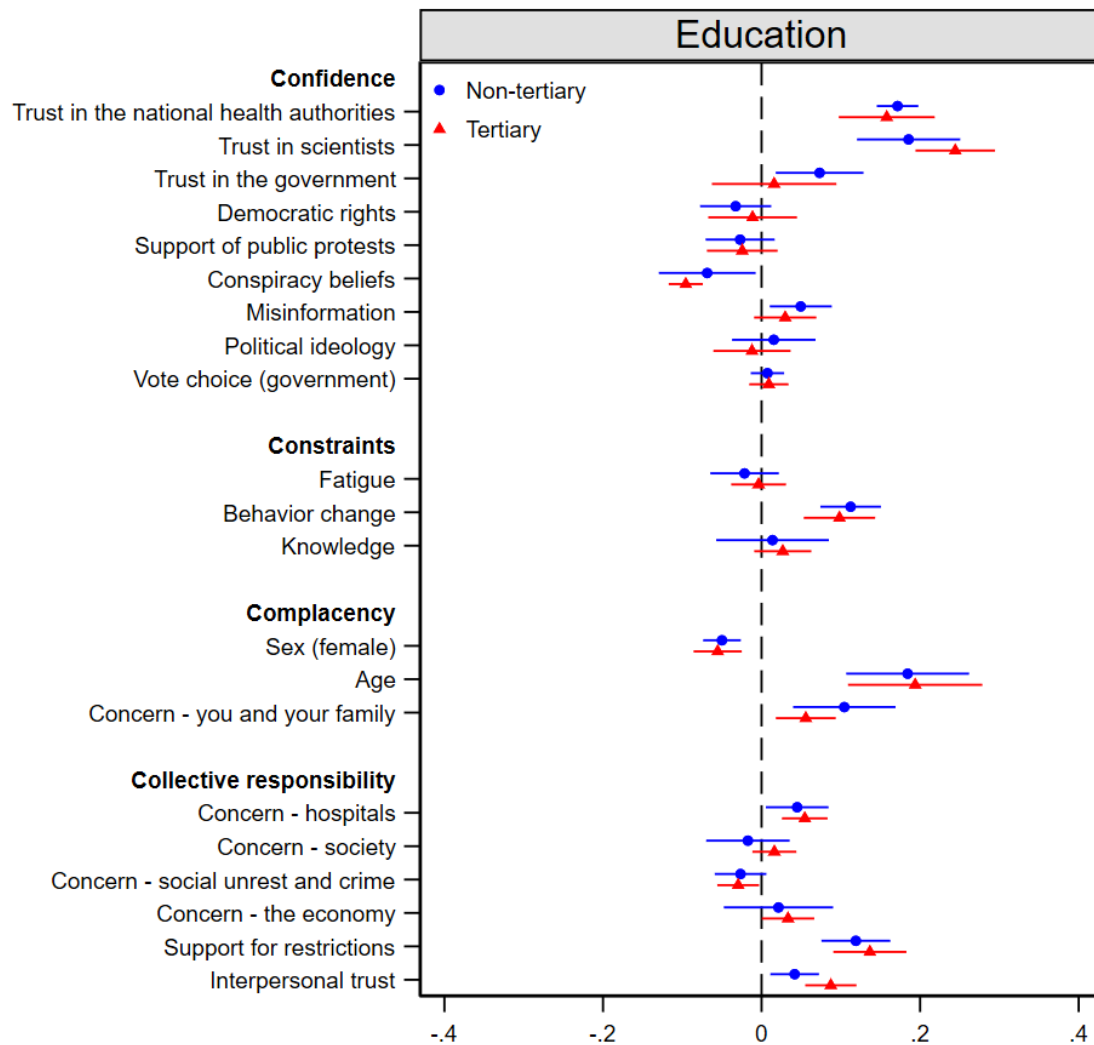

Note: N = 18,231. Blue circles and red triangles are the estimated correlations. Horizontal lines are the associated 95 % confidence intervals.

Figure A16: Macro-level correlations of vaccine acceptance



Note: The figure plots country averages for vaccine acceptance and country averages for the range of non-background measures. Reported correlations are Pearson's r.

**STROBE 2007 (v4) Statement—Checklist of items that should be included in reports of *cross-sectional studies***

| Section/Topic                | Item # | Recommendation                                                                                                                                                                       | Reported on page # |
|------------------------------|--------|--------------------------------------------------------------------------------------------------------------------------------------------------------------------------------------|--------------------|
| <b>Title and abstract</b>    | 1      | (a) Indicate the study's design with a commonly used term in the title or the abstract                                                                                               | 0                  |
|                              |        | (b) Provide in the abstract an informative and balanced summary of what was done and what was found                                                                                  | 1                  |
| <b>Introduction</b>          |        |                                                                                                                                                                                      |                    |
| Background/rationale         | 2      | Explain the scientific background and rationale for the investigation being reported                                                                                                 | 3                  |
| Objectives                   | 3      | State specific objectives, including any prespecified hypotheses                                                                                                                     | 3                  |
| <b>Methods</b>               |        |                                                                                                                                                                                      |                    |
| Study design                 | 4      | Present key elements of study design early in the paper                                                                                                                              | 7-8                |
| Setting                      | 5      | Describe the setting, locations, and relevant dates, including periods of recruitment, exposure, follow-up, and data collection                                                      | 7-8                |
| Participants                 | 6      | (a) Give the eligibility criteria, and the sources and methods of selection of participants                                                                                          | 7-8                |
| Variables                    | 7      | Clearly define all outcomes, exposures, predictors, potential confounders, and effect modifiers. Give diagnostic criteria, if applicable                                             | 8-12               |
| Data sources/<br>measurement | 8*     | For each variable of interest, give sources of data and details of methods of assessment (measurement). Describe comparability of assessment methods if there is more than one group | 8-12               |
| Bias                         | 9      | Describe any efforts to address potential sources of bias                                                                                                                            |                    |
| Study size                   | 10     | Explain how the study size was arrived at                                                                                                                                            | 7                  |
| Quantitative variables       | 11     | Explain how quantitative variables were handled in the analyses. If applicable, describe which groupings were chosen and why                                                         | 11-12              |
| Statistical methods          | 12     | (a) Describe all statistical methods, including those used to control for confounding                                                                                                | 12-13              |
|                              |        | (b) Describe any methods used to examine subgroups and interactions                                                                                                                  |                    |
|                              |        | (c) Explain how missing data were addressed                                                                                                                                          | 12                 |
|                              |        | (d) If applicable, describe analytical methods taking account of sampling strategy                                                                                                   |                    |
|                              |        | (e) Describe any sensitivity analyses                                                                                                                                                | 12-13              |
| <b>Results</b>               |        |                                                                                                                                                                                      |                    |

|                          |     |                                                                                                                                                                                                                                                                                                                                                                                                               |                                       |
|--------------------------|-----|---------------------------------------------------------------------------------------------------------------------------------------------------------------------------------------------------------------------------------------------------------------------------------------------------------------------------------------------------------------------------------------------------------------|---------------------------------------|
| Participants             | 13* | (a) Report numbers of individuals at each stage of study—eg numbers potentially eligible, examined for eligibility, confirmed eligible, included in the study, completing follow-up, and analysed<br>(b) Give reasons for non-participation at each stage<br>(c) Consider use of a flow diagram                                                                                                               | 2 + Table A1 in the OA                |
| Descriptive data         | 14* | (a) Give characteristics of study participants (eg demographic, clinical, social) and information on exposures and potential confounders<br>(b) Indicate number of participants with missing data for each variable of interest                                                                                                                                                                               | Table A2 in the OA                    |
| Outcome data             | 15* | Report numbers of outcome events or summary measures                                                                                                                                                                                                                                                                                                                                                          | 11 + Figure 1                         |
| Main results             | 16  | (a) Give unadjusted estimates and, if applicable, confounder-adjusted estimates and their precision (eg, 95% confidence interval). Make clear which confounders were adjusted for and why they were included<br>(b) Report category boundaries when continuous variables were categorized<br>(c) If relevant, consider translating estimates of relative risk into absolute risk for a meaningful time period | 14-16 + Figure 2 + Table A4 in the OA |
| Other analyses           | 17  | Report other analyses done—eg analyses of subgroups and interactions, and sensitivity analyses                                                                                                                                                                                                                                                                                                                | 16 + OA                               |
| <b>Discussion</b>        |     |                                                                                                                                                                                                                                                                                                                                                                                                               |                                       |
| Key results              | 18  | Summarise key results with reference to study objectives                                                                                                                                                                                                                                                                                                                                                      | 16-17                                 |
| Limitations              | 19  | Discuss limitations of the study, taking into account sources of potential bias or imprecision. Discuss both direction and magnitude of any potential bias                                                                                                                                                                                                                                                    | 18                                    |
| Interpretation           | 20  | Give a cautious overall interpretation of results considering objectives, limitations, multiplicity of analyses, results from similar studies, and other relevant evidence                                                                                                                                                                                                                                    |                                       |
| Generalisability         | 21  | Discuss the generalisability (external validity) of the study results                                                                                                                                                                                                                                                                                                                                         | 18                                    |
| <b>Other information</b> |     |                                                                                                                                                                                                                                                                                                                                                                                                               |                                       |
| Funding                  | 22  | Give the source of funding and the role of the funders for the present study and, if applicable, for the original study on which the present article is based                                                                                                                                                                                                                                                 | 2                                     |

\*Give information separately for cases and controls in case-control studies and, if applicable, for exposed and unexposed groups in cohort and cross-sectional studies.

**Note:** An Explanation and Elaboration article discusses each checklist item and gives methodological background and published examples of transparent reporting. The STROBE checklist is best used in conjunction with this article (freely available on the Web sites of PLoS Medicine at <http://www.plosmedicine.org/>, Annals of Internal Medicine at <http://www.annals.org/>, and Epidemiology at <http://www.epidem.com/>). Information on the STROBE Initiative is available at [www.strobe-statement.org](http://www.strobe-statement.org).
