# Supplementary material for: Public acceptance of COVID-19 vaccines: cross-national evidence on levels and individual-level predictors using observational data
Source: PubMed Central journal article supplement — BMJ Open. 2021 Jun 15;11(6):e048172. doi: 10.1136/bmjopen-2020-048172 (PMC8210695; doi:10.1136/bmjopen-2020-048172), 2021-06-15
Supplement: bmjopen-2020-048172supp001.pdf [file bmjopen-2020-048172supp001.pdf]

**Table A1:** Overview of data collection

| <b>Country</b> | <b>Dates</b>                           | <b>Obs.</b> |
|----------------|----------------------------------------|-------------|
| Denmark        | September 13, 2020 – February 16, 2021 | 2,765       |
| Sweden         | September 20, 2020 – February 16, 2021 | 2,149       |
| United Kingdom | September 20, 2020 – February 16, 2021 | 2,437       |
| United States  | September 20, 2020 – February 16, 2021 | 2,185       |
| Italy          | September 20, 2020 – February 16, 2021 | 2,411       |
| France         | September 20, 2020 – February 16, 2021 | 2,090       |
| Germany        | September 20, 2020 – February 16, 2021 | 2,380       |
| Hungary        | September 20, 2020 – February 16, 2021 | 1,814       |

**Table A2:** Descriptive statistics

|                                      | <b>Mean</b> | <b>SD</b> | <b>Min</b> | <b>Max</b> | <b>N</b> |
|--------------------------------------|-------------|-----------|------------|------------|----------|
| <b>Vaccine acceptance</b>            | 0.66        | 0.34      | 0          | 1          | 18,231   |
| <b>Confidence</b>                    |             |           |            |            |          |
| Trust in national health authorities | 0.70        | 0.29      | 0          | 1          | 18,231   |
| Trust in scientists                  | 0.76        | 0.26      | 0          | 1          | 18,231   |
| Trust in the government              | 0.54        | 0.31      | 0          | 1          | 18,231   |
| Concern about democratic rights      | 0.47        | 0.35      | 0          | 1          | 18,231   |
| Support for protests                 | 0.36        | 0.36      | 0          | 1          | 18,231   |
| Conspiracy beliefs                   | 0.46        | 0.36      | 0          | 1          | 18,231   |
| Misinformation                       | 0.60        | 0.31      | 0          | 1          | 18,231   |
| Political ideology                   | 0.50        | 0.26      | 0          | 1          | 18,231   |
| Vote choice (government)             | 0.47        | 0.50      | 0          | 1          | 18,231   |
| <b>Constraints</b>                   |             |           |            |            |          |
| Fatigue                              | 0.37        | 0.33      | 0          | 1          | 18,231   |
| Behavior change                      | 0.73        | 0.27      | 0          | 1          | 18,231   |
| Knowledge                            | 0.80        | 0.22      | 0          | 1          | 18,231   |
| <b>Complacency</b>                   |             |           |            |            |          |
| Sex (female)                         | 0.46        | 0.50      | 0          | 1          | 18,231   |
| Age                                  | 0.35        | 0.18      | 0          | 1          | 18,231   |
| Education (tertiary)                 | 0.50        | 0.50      | 0          | 1          | 18,231   |
| Concern - you and your family        | 0.67        | 0.28      | 0          | 1          | 18,231   |
| <b>Collective responsibility</b>     |             |           |            |            |          |
| Concern - hospitals                  | 0.71        | 0.29      | 0          | 1          | 18,231   |
| Concern - society                    | 0.69        | 0.28      | 0          | 1          | 18,231   |
| Concern - social unrest and crime    | 0.63        | 0.31      | 0          | 1          | 18,231   |
| Concern - the country's economy      | 0.78        | 0.26      | 0          | 1          | 18,231   |
| Support for restrictions             | 0.69        | 0.27      | 0          | 1          | 18,231   |
| Interpersonal trust                  | 0.50        | 0.28      | 0          | 1          | 18,231   |

**Table A3:** Coding of vote choice variable

| <b>Country</b> | <b>Government</b>       | <b>Opposition</b>      |
|----------------|-------------------------|------------------------|
| Denmark        | Socialdemokratiet       | Konservative           |
|                | Radikale                | Nye Borgerlige         |
|                | Socialistisk Folkeparti | Klaus Riskjær Pedersen |
|                | Enhedslisten            | Liberal Alliance       |
|                |                         | Kristendemokraterne    |
|                |                         | Dansk Folkeparti       |
|                |                         | Stram Kurs             |
| Sweden         | Miljöpartiet            | Kristendemokraterna    |
|                | Socialdemokraterna      | Moderaterna            |
|                | Vänsterpartiet          | Sverigedemokraterna    |
|                | Centerpartiet           |                        |
|                | Liberalerna             |                        |
| United Kingdom | Conservative            | Labour                 |
|                |                         | SNP                    |
|                |                         | Liberal Democrats      |
| United States  | Republicans             | Democrats              |
| Italy          | Centre-Left             | Centre-Right           |
|                | Five Star Movement      | Free and Equal         |
| France         | Macron                  | Fillon                 |
|                |                         | Le Pen                 |
|                |                         | Dupont-Aignan          |
|                |                         | Hamon                  |
| Germany        | CDU/SDU                 | AfD                    |
|                | SPD                     | FDP                    |
|                |                         | Die Linke              |
|                |                         | Grüne                  |
| Hungary        | Fidesz-KDNP             | Jobbik                 |
|                |                         | MSZP-MM                |
|                |                         | LMP                    |
|                |                         | DK                     |
|                |                         | MM                     |

Figure A1: Bivariate correlations

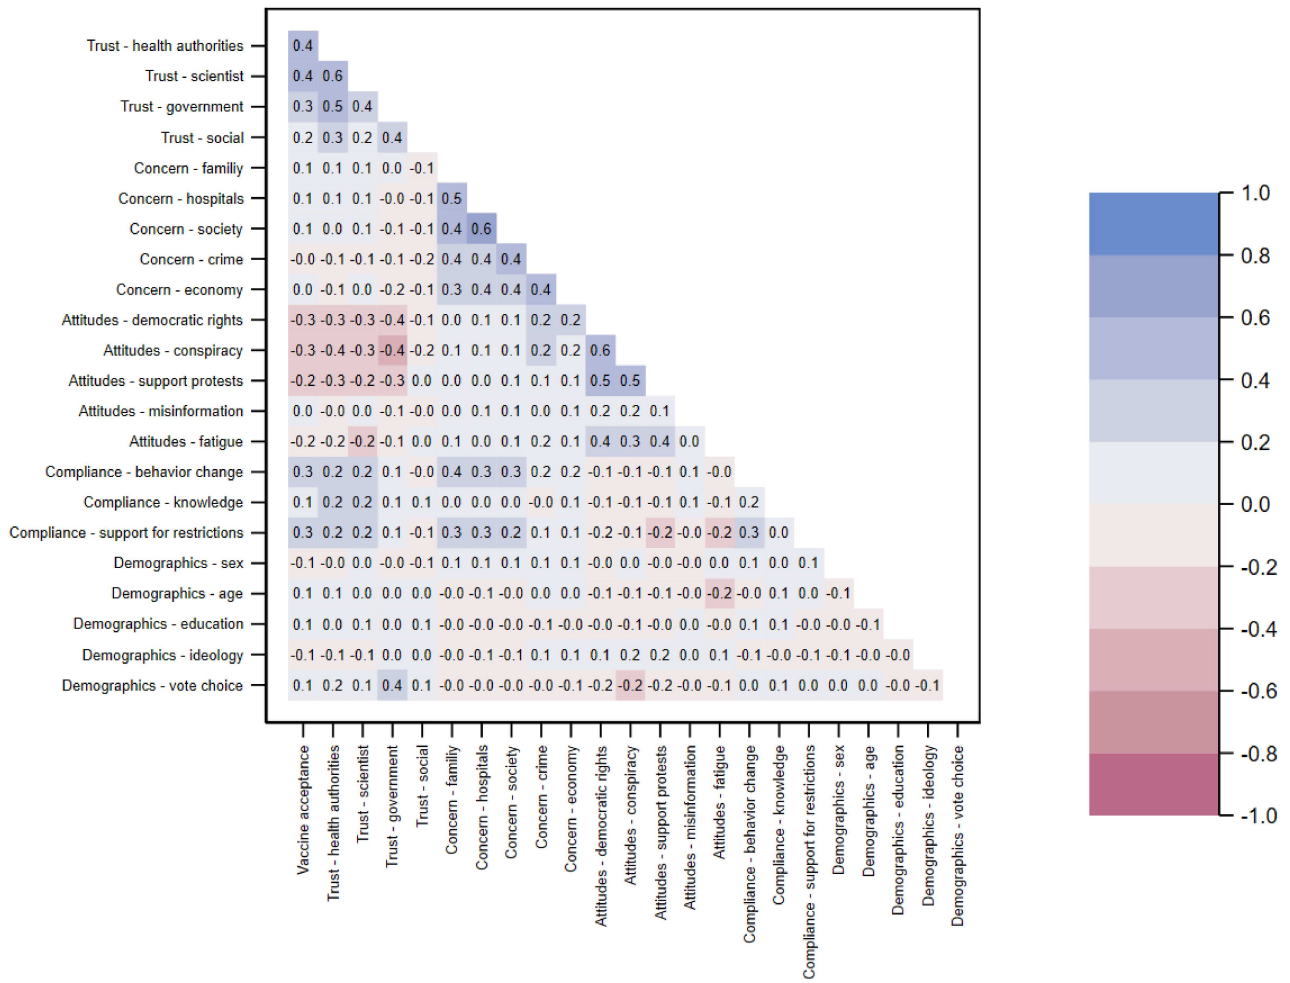

**Figure A2:** Replicating the analysis with categorical trust variables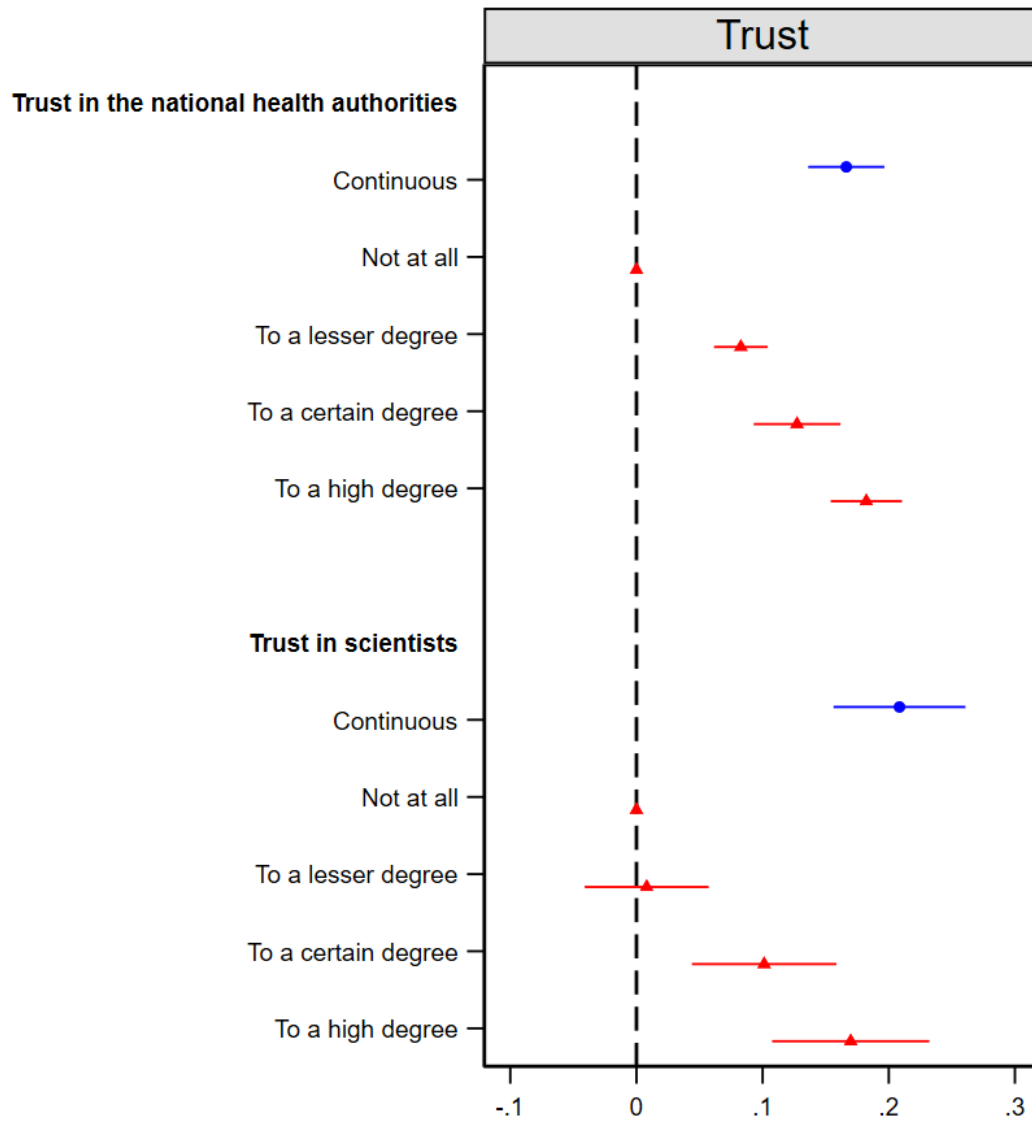

Note: N = 18,231. Blue circles are the estimated correlations based on model II in Table A4 (continuous trust variables). Red triangles are the estimated correlations based on the same model, using categorical trust variables instead. Both models include control for country dummies. Horizontal lines are the associated 95 % confidence intervals.

**Figure A3:** Replicating the analysis with categorical concern variables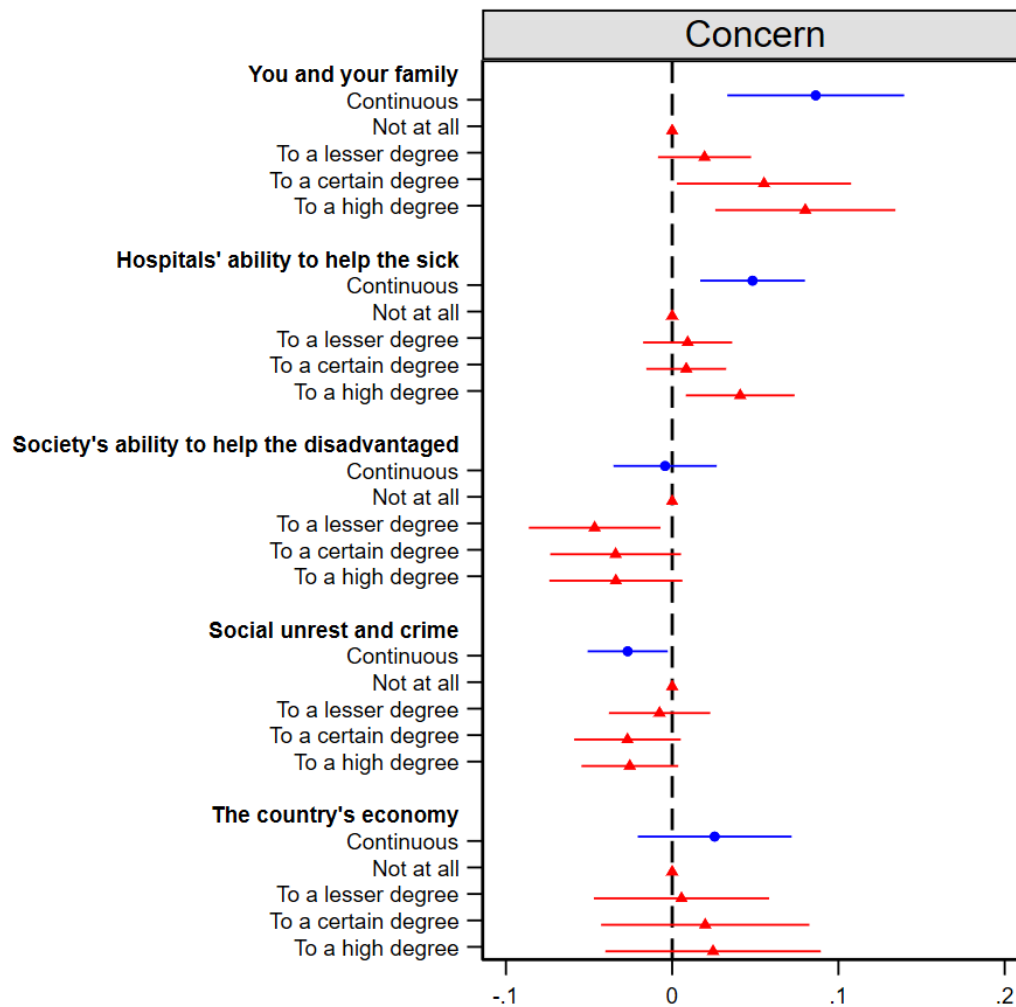

Note: N =18,231. Blue circles are the estimated correlations based on model II in Table A4 (continuous concern variables). Red triangles are the estimated correlations based on the same model, using categorical concern variables instead. Both models include control for country dummies. Horizontal lines are the associated 95 % confidence intervals.

**Figure A4:** Replicating the analysis with a categorical behavior change variable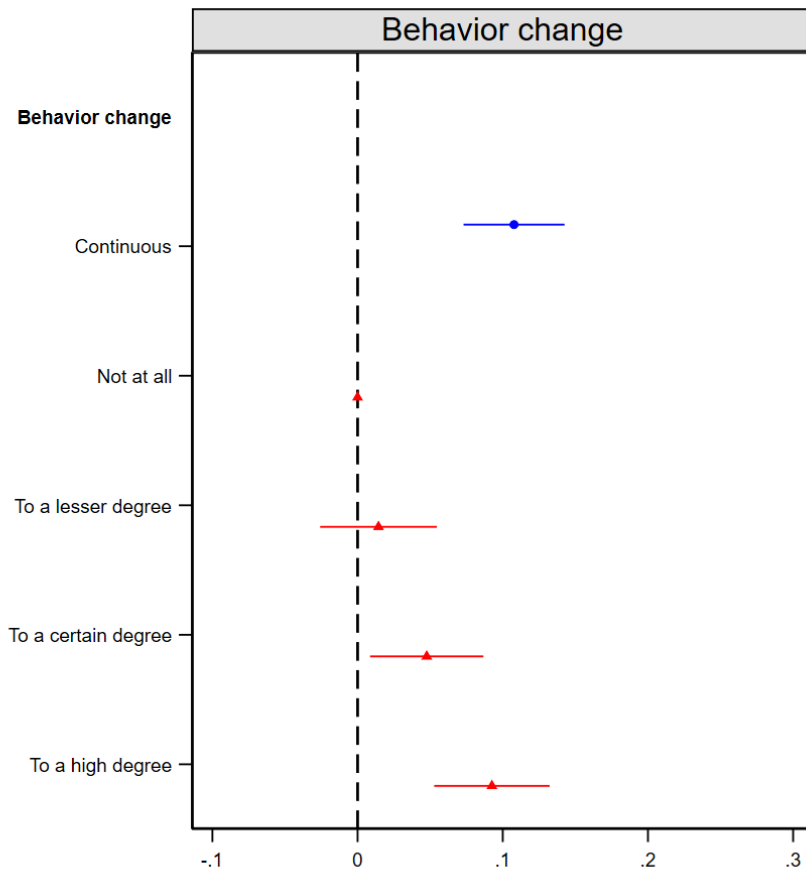

Note: N = 18,231. Blue circles are the estimated correlations based on model II in Table A4 (continuous behavior change variable). Red triangles are the estimated correlations based on the same model, using a categorical behavior change variable instead. Both models include control for country dummies. Horizontal lines are the associated 95 % confidence intervals.

**Figure A5:** Replicating the analysis with a categorical knowledge variable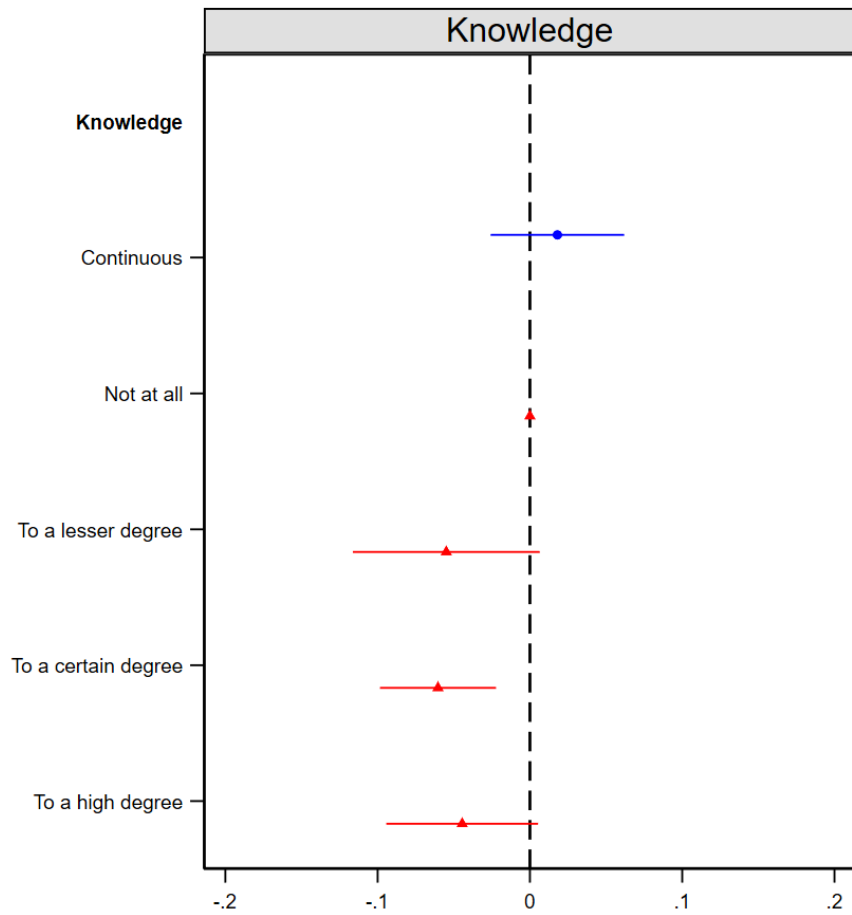

Note: N = 18,231. Blue circles are the estimated correlations based on model II in Table A4 (continuous knowledge variable). Red triangles are the estimated correlations based on the same model, using a categorical knowledge variable instead. Both models include control for country dummies. Horizontal lines are the associated 95 % confidence intervals.



**Figure A6:** Replicating the analysis with a dichotomous vaccine acceptance outcome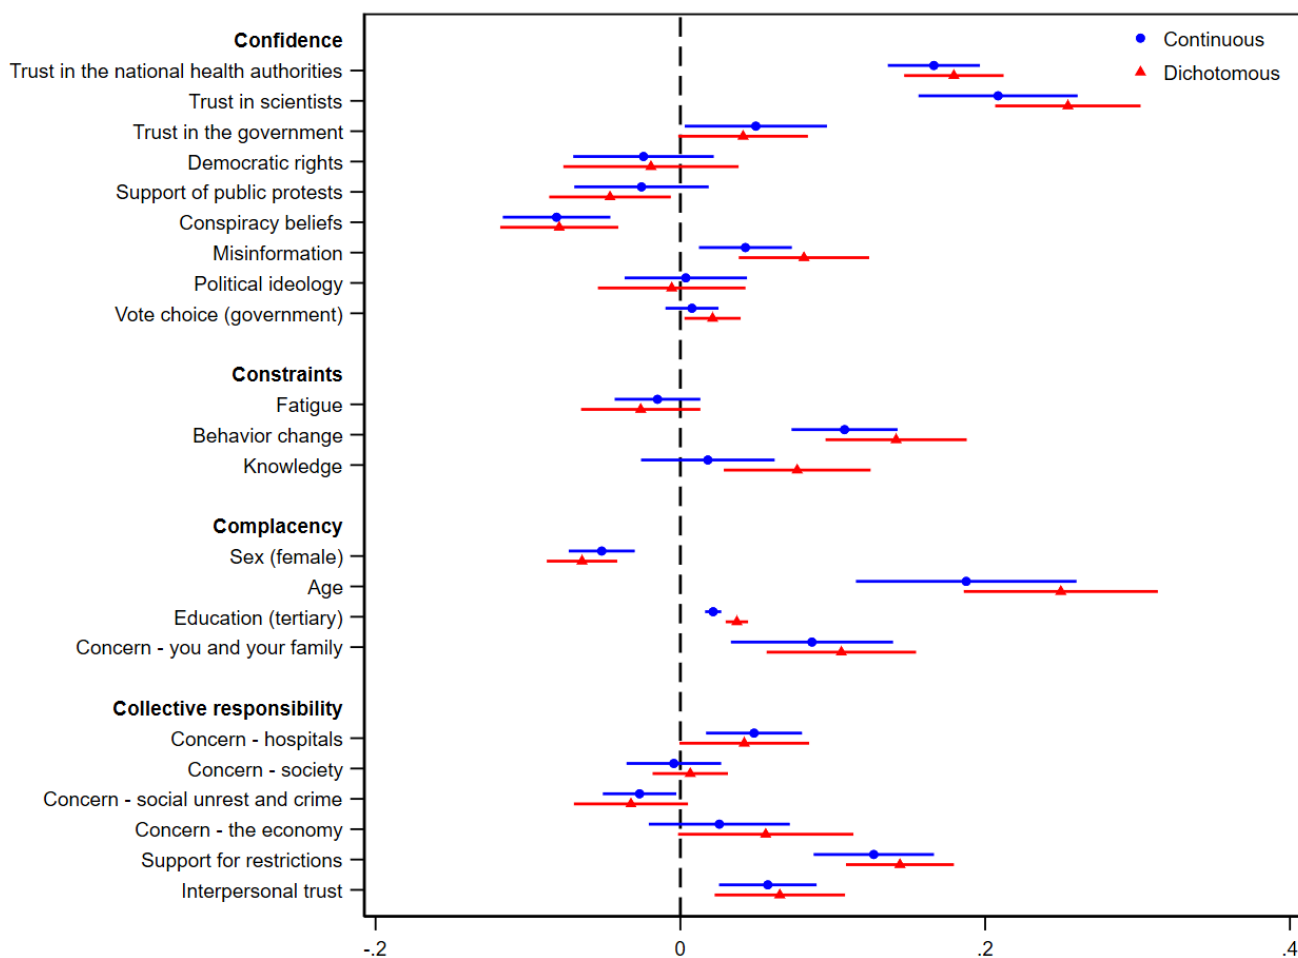

Note: N = 18,231. Blue circles are the estimated correlations based on model II in Table A4 (continuous outcome). Red triangles are the estimated correlations based on the same model, using a dichotomous measure of vaccine acceptance instead (with “somewhat agree” and “completely agree” taking the value 1, indicating vaccine acceptance). Both models include control for country dummies. Horizontal lines are the associated 95 % confidence intervals.

**Figure A7:** Comparing results before and after approval of COVID-19 vaccines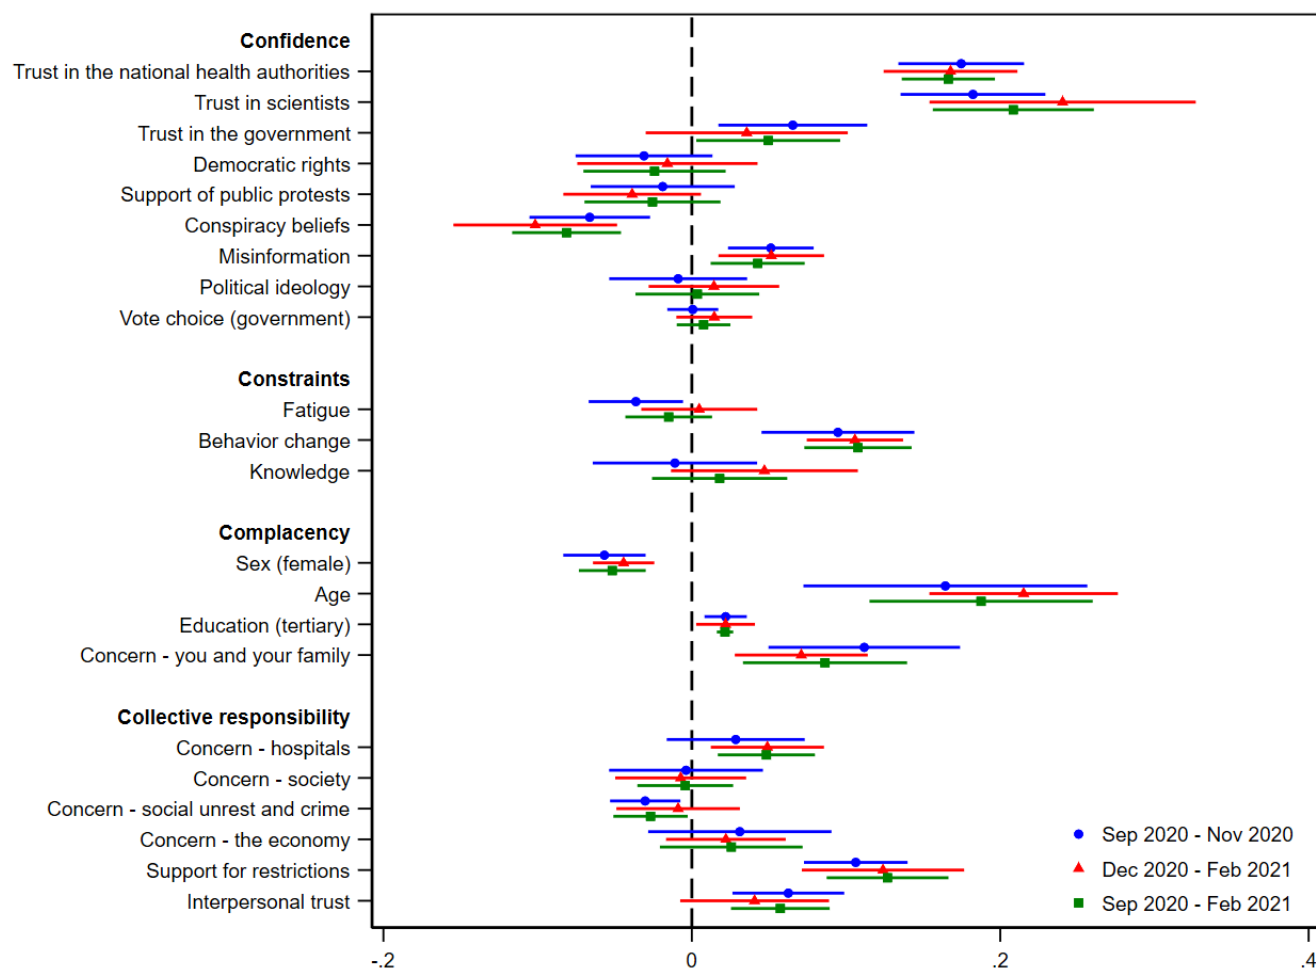

Note: N = 10,417 (September 2020 – November 2020). N = 7,814 (December 2020 – February 2021). N = 18,231 (September 2020 – February 2021). Green squares are the estimated correlations based on model II in Table A4 (September 2020 - November 2020). Blue circles are the estimated correlations based on the same model for September 2020 – November 2020. Red triangles are the estimated correlations based on the same model for December 2020 – February 2021. All models include control for country dummies. Horizontal lines are the associated 95 % confidence intervals.

**Figure A8:** Individual-level predictors in the US, controlling for region dummies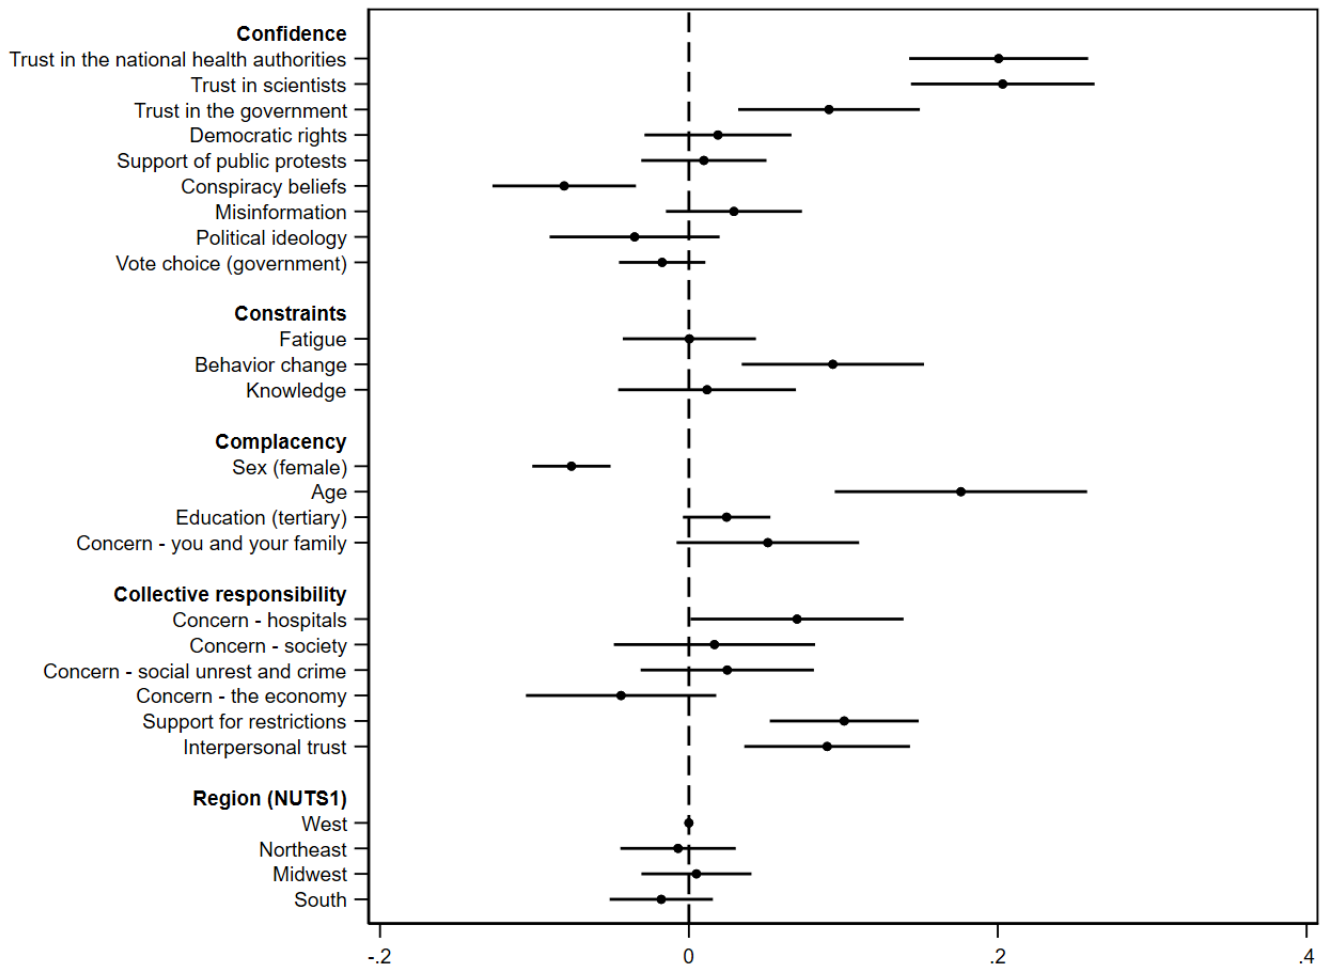

Note: N = 2,185. Circles are the estimated correlations. Horizontal lines are the associated 95 % confidence intervals.

**Figure A9:** Individual-level predictors in the US, controlling for state dummies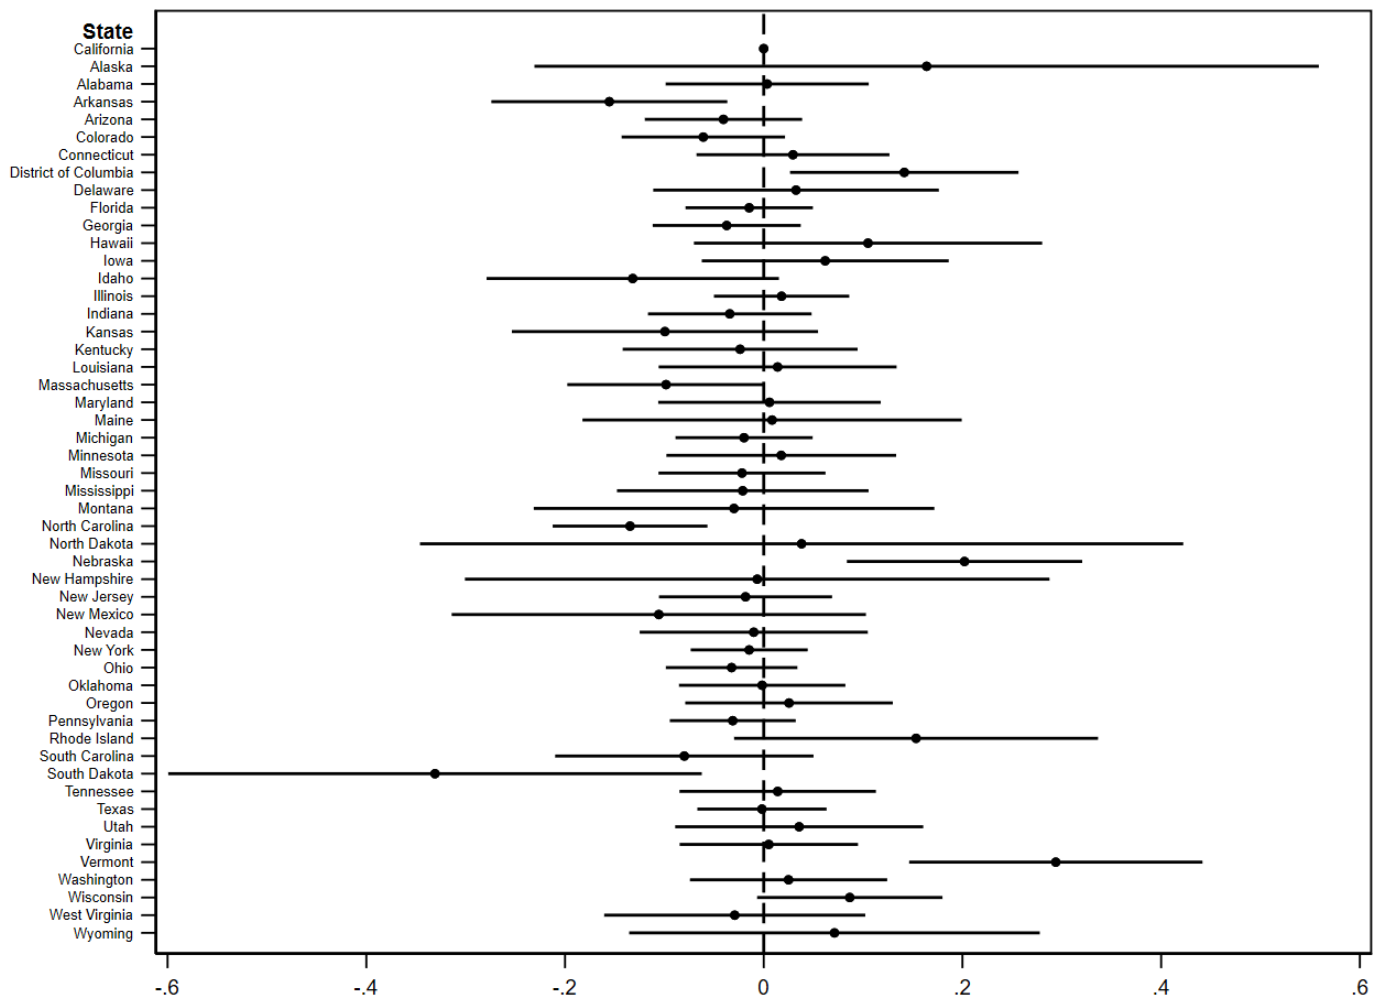

Note: N = 2,185. Circles are the estimated correlations. The model include all predictors from model II in table A4, controlling for state dummies instead of country level dummies. For simplicity, only the estimated correlations for the state dummies are illustrated here. Horizontal lines are the associated 95 % confidence intervals.

**Figure A10:** Individual-level predictors in Germany, controlling for state dummies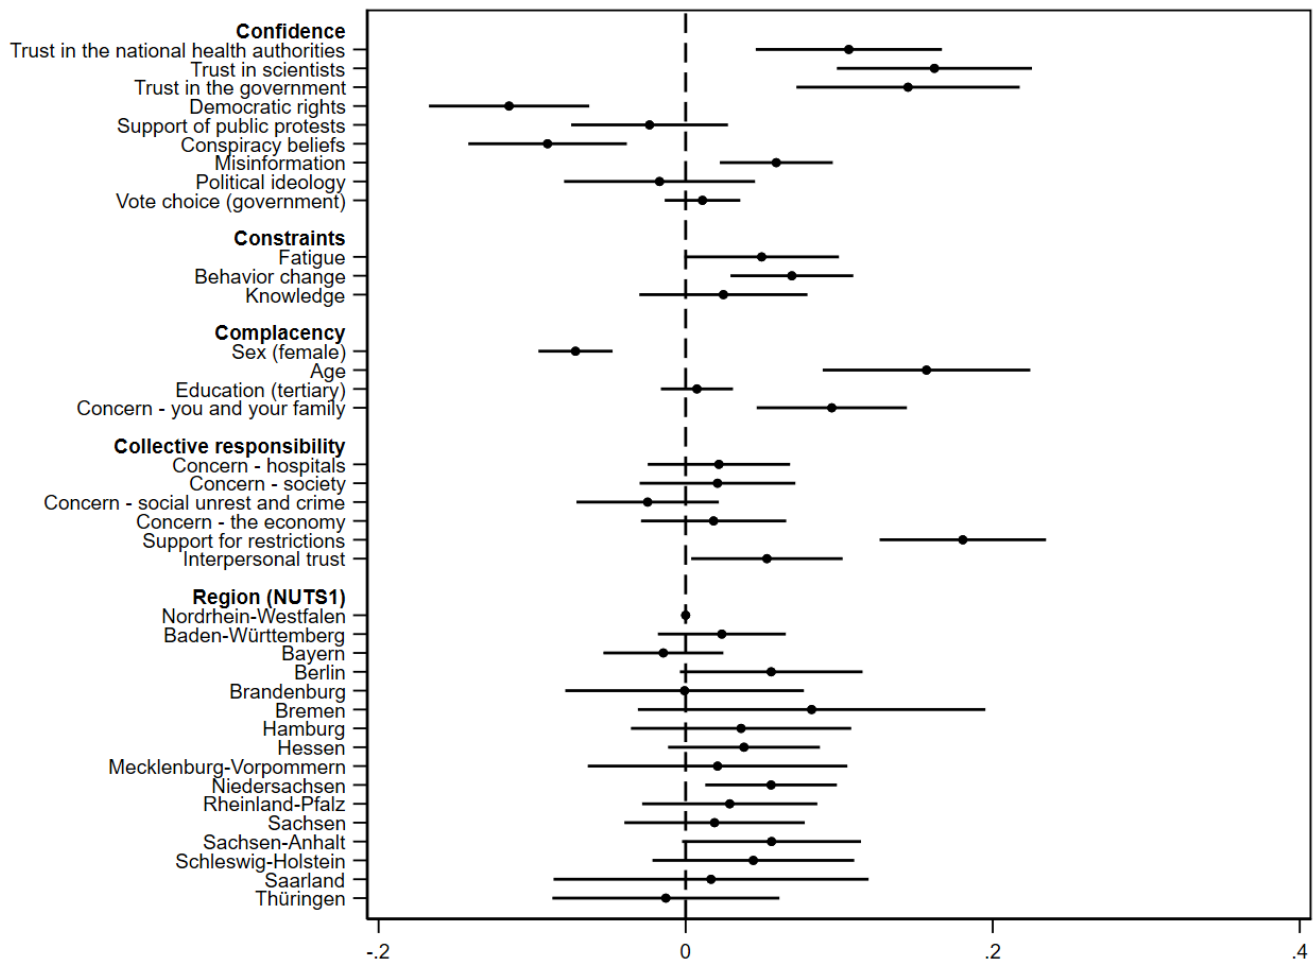

Note: N = 2,380. Circles are the estimated correlations. Horizontal lines are the associated 95 % confidence intervals.

**Table A4:** Individual-level predictors of vaccine acceptance

|                                   | <b>Model I</b> |         | <b>Model II</b> |         |
|-----------------------------------|----------------|---------|-----------------|---------|
|                                   | Bivariate      |         | Full model      |         |
| <b>Confidence</b>                 |                |         |                 |         |
| Trust in health authorities       | 0.498***       | (0.008) | 0.166***        | (0.013) |
| Trust in scientists               | 0.531***       | (0.009) | 0.208***        | (0.022) |
| Trust in the government           | 0.344***       | (0.008) | 0.050*          | (0.020) |
| Concern about democratic rights   | -0.256***      | (0.007) | -0.024          | (0.020) |
| Support for protests              | -0.224***      | (0.007) | -0.026          | (0.019) |
| Conspiracy beliefs                | -0.297***      | (0.007) | -0.081***       | (0.015) |
| Misinformation                    | 0.017*         | (0.008) | 0.043*          | (0.013) |
| Ideology                          | -0.115***      | (0.009) | 0.004           | (0.017) |
| Vote choice (government)          | 0.078***       | (0.005) | 0.008           | (0.007) |
| <b>Constraints</b>                |                |         |                 |         |
| Fatigue                           | -0.189***      | (0.007) | -0.015          | (0.012) |
| Behavior change                   | 0.312***       | (0.009) | 0.108***        | (0.015) |
| Knowledge                         | 0.232***       | (0.011) | 0.018           | (0.019) |
| <b>Complacency</b>                |                |         |                 |         |
| Sex (female)                      | -0.046***      | (0.005) | -0.052***       | (0.009) |
| Age                               | 0.231***       | (0.013) | 0.188***        | (0.031) |
| Education (tertiary)              | 0.049***       | (0.005) | 0.022***        | (0.002) |
| Concern - you and your family     | 0.173***       | (0.009) | 0.086**         | (0.023) |
| <b>Collective responsibility</b>  |                |         |                 |         |
| Concern - hospitals               | 0.137***       | (0.009) | 0.048**         | (0.013) |
| Concern - society                 | 0.099***       | (0.009) | -0.004          | (0.013) |
| Concern - social unrest and crime | -0.049***      | (0.008) | -0.027*         | (0.010) |
| Concern - the country's economy   | 0.003          | (0.010) | 0.026           | (0.020) |
| Support for restrictions          | 0.334***       | (0.009) | 0.127***        | (0.017) |
| Interpersonal trust               | 0.204***       | (0.009) | 0.057**         | (0.014) |
| Constant                          |                |         | -0.034          | (0.025) |
| Observations                      | 18,231         |         | 18,231          |         |
| R <sup>2</sup>                    | NA             |         | 0.322           |         |

Notes. Entries are unstandardized OLS regression coefficients from models with all variables standardized on a scale from 0-1. Clustered robust standard errors on country level in parentheses. Model 1 displays effects from bivariate models and, hence, a combined R<sup>2</sup> cannot be computed. Model II includes control for country dummies. \*  $p < 0.05$ , \*\*  $p < 0.01$ , \*\*\*  $p < 0.001$ .

**Figure A11:** Individual-level correlations of vaccine acceptance by country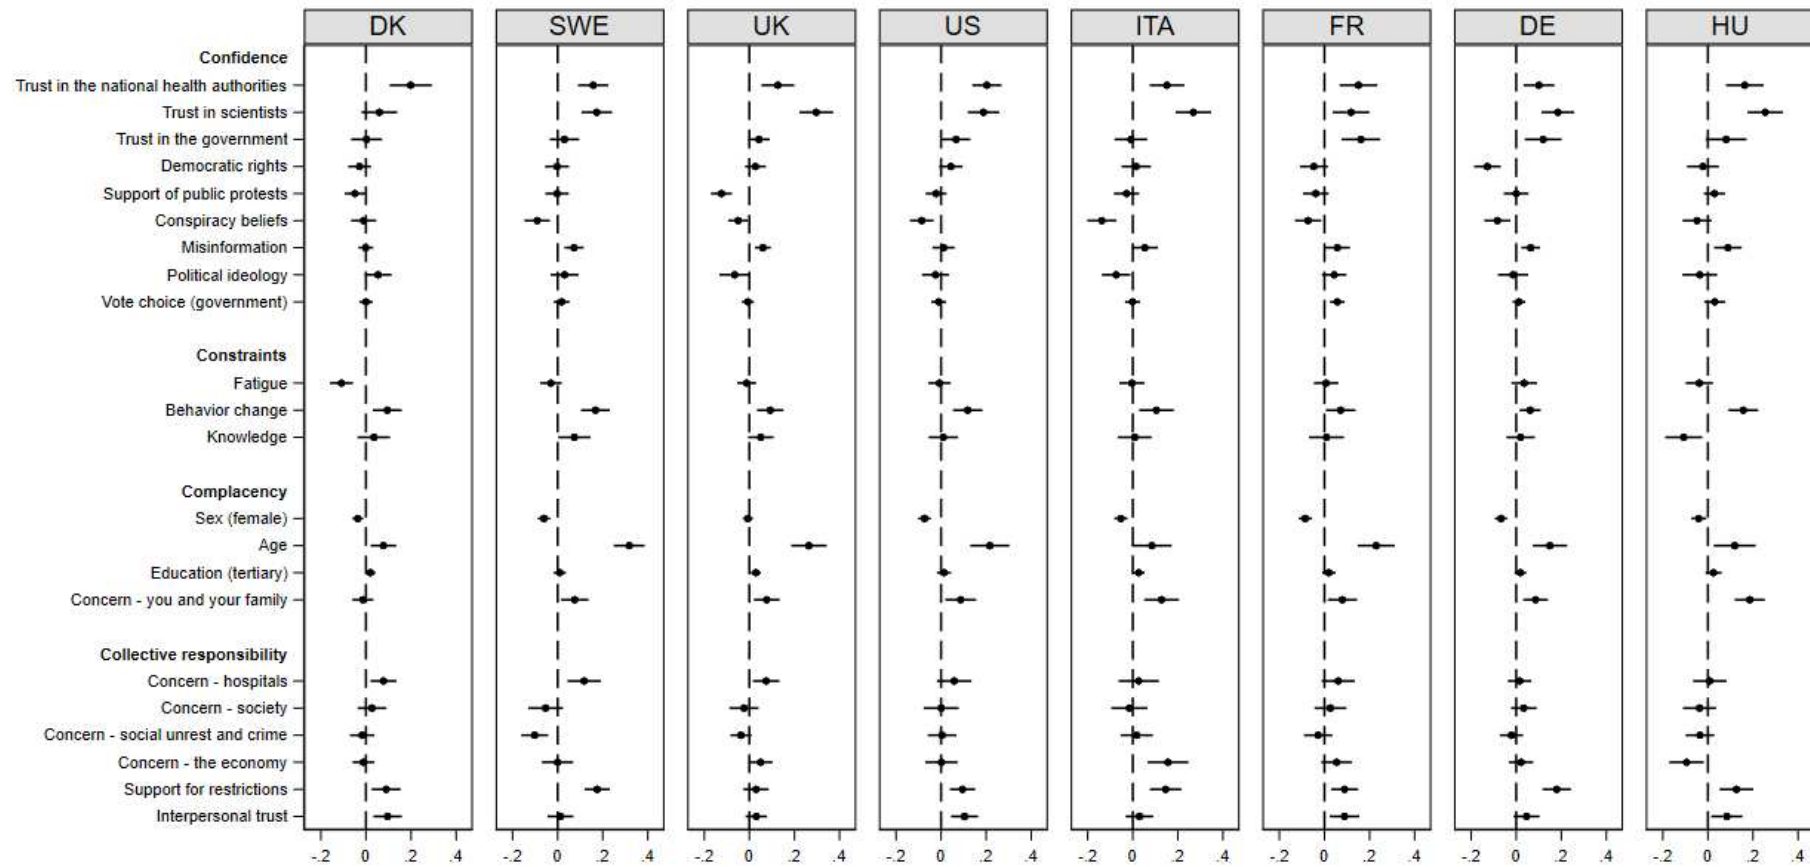

Note: N = 18,231. Black circles are the estimated correlations. Horizontal bars are the associated 95 % confidence intervals.

Figure A12: Bivariate correlations by country

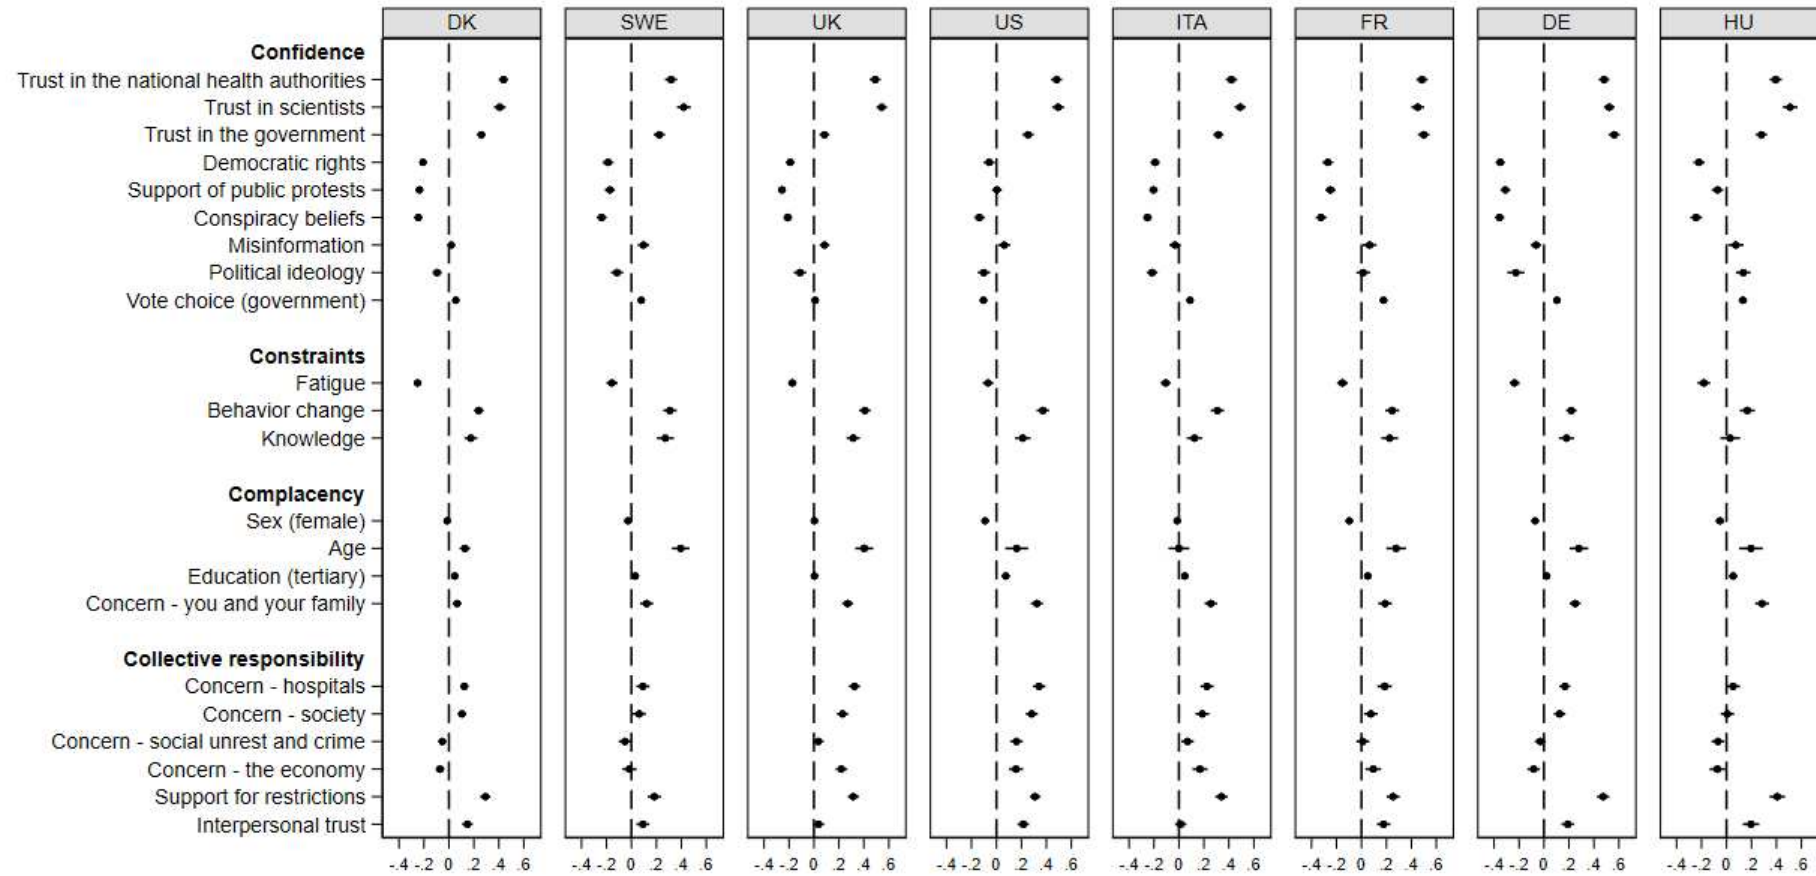

Note: N = 18,231. Black circles are the estimated bivariate correlations. Horizontal bars are the associated 95 % confidence intervals.



Figure A13: Subgroup analysis – sex

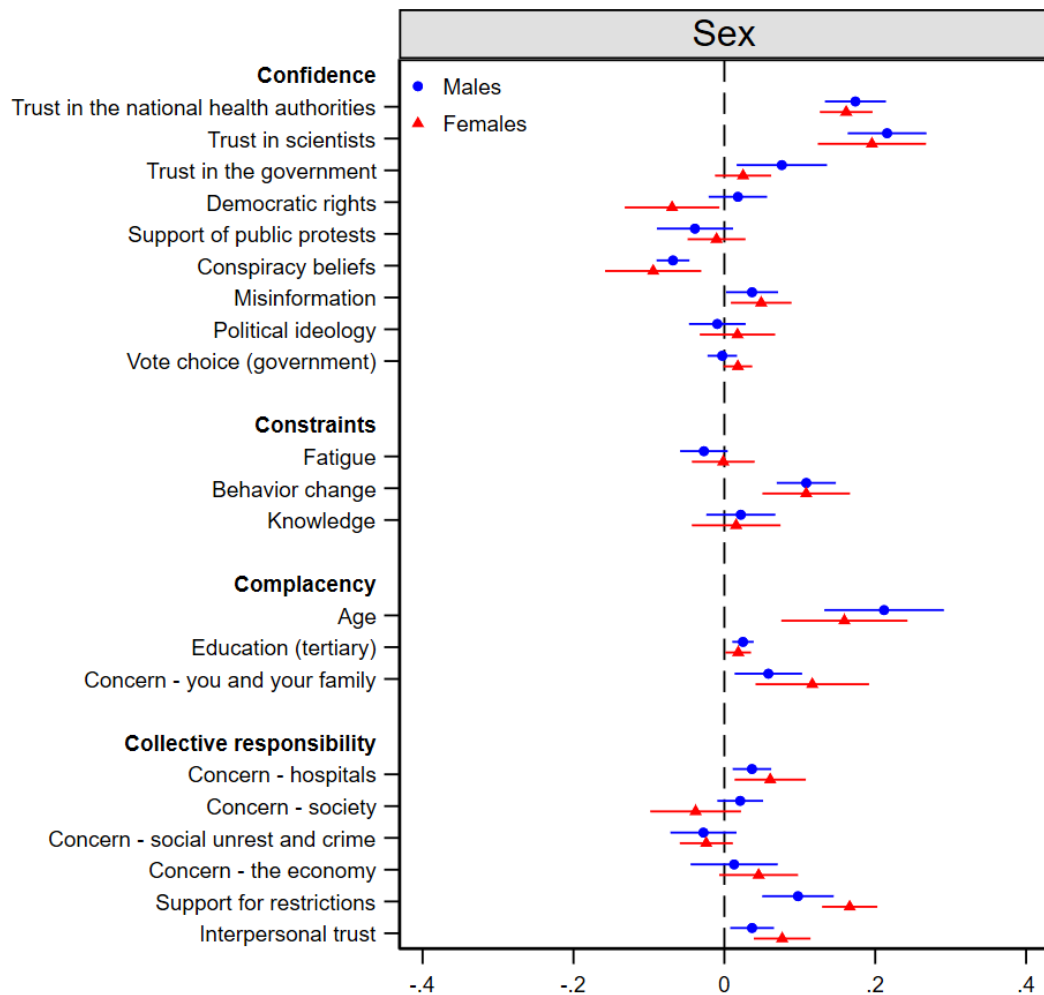

Note: N = 18,231. Blue circles and red triangles are the estimated correlations. Horizontal lines are the associated 95 % confidence intervals.

Figure A14: Subgroup analysis – age

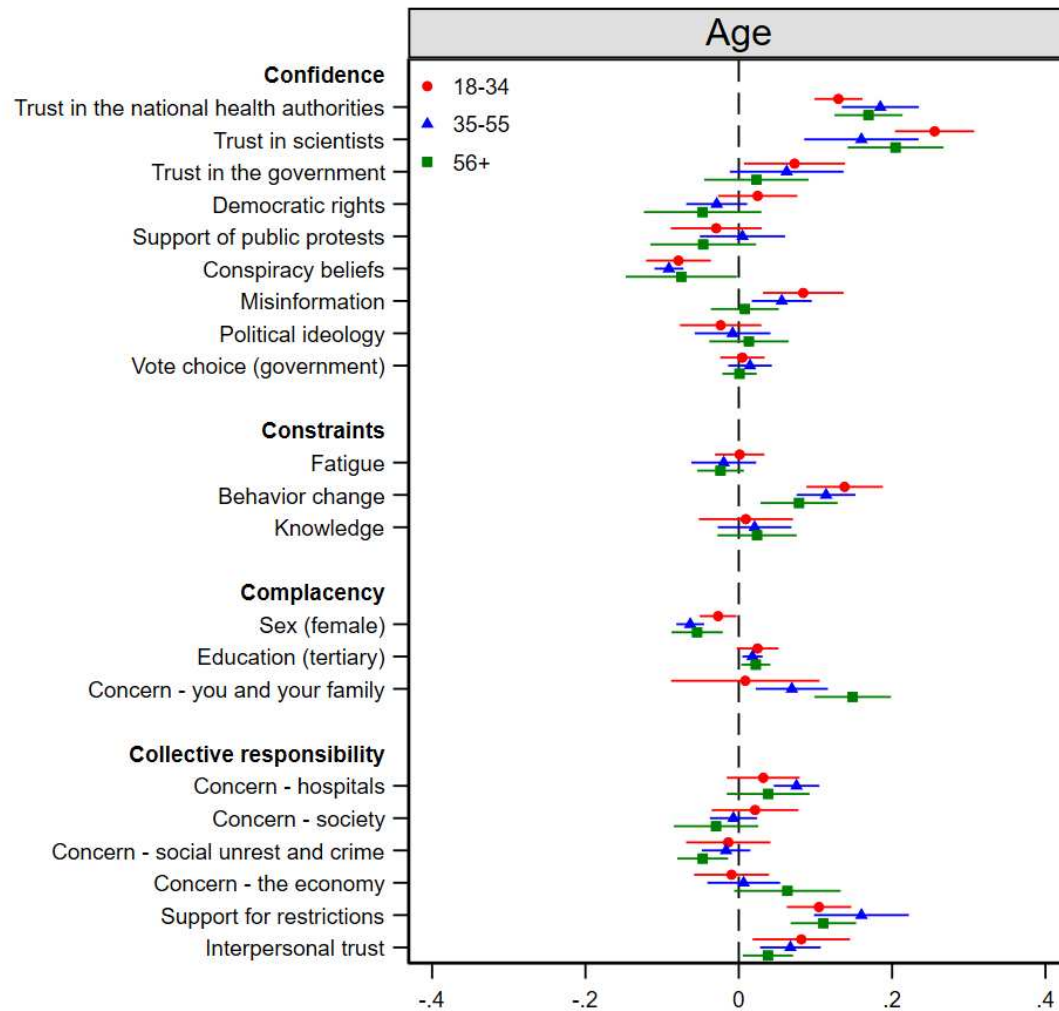

Note: N = 18,231. Red circles, blue triangles and green squares are the estimated correlations. Horizontal lines are the associated 95 % confidence intervals.

**Figure A15:** Subgroup analysis – education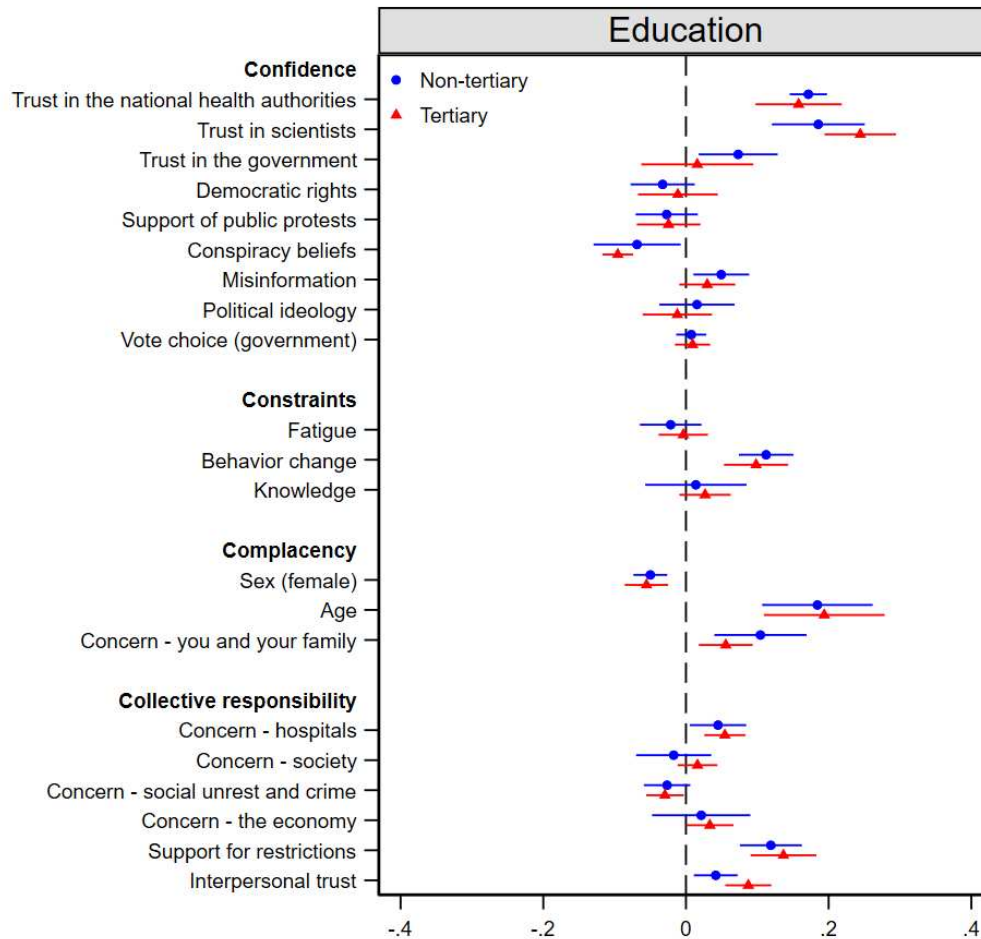

Note: N = 18,231. Blue circles and red triangles are the estimated correlations. Horizontal lines are the associated 95 % confidence intervals.

Figure A16: Macro-level correlations of vaccine acceptance

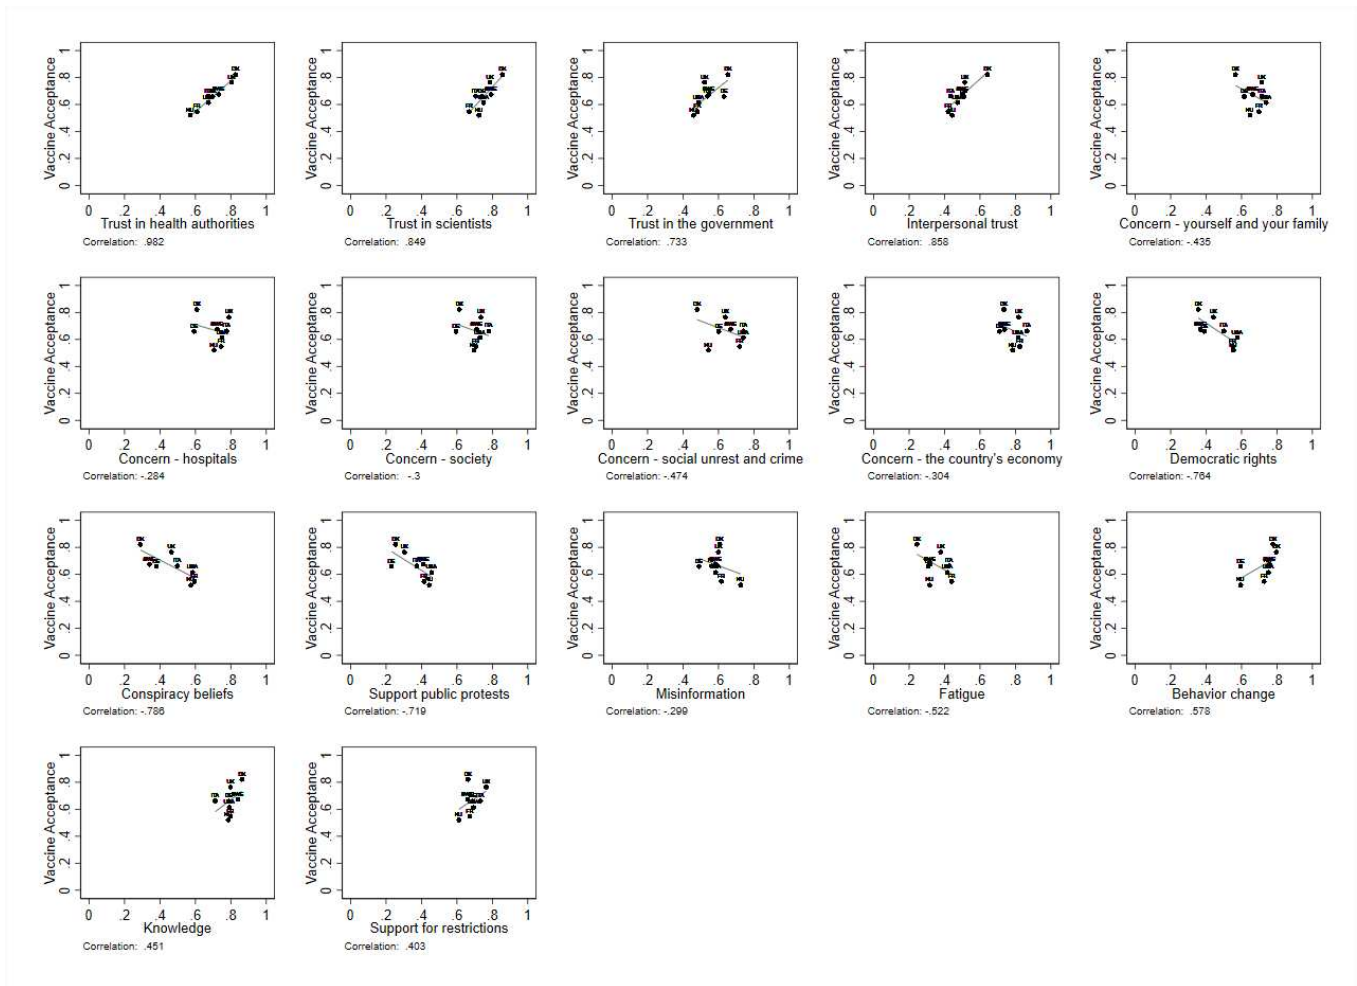

Note: The figure plots country averages for vaccine acceptance and country averages for the range of non-background measures. Reported correlations are Pearson's  $r$ .
